# Supplementary material for: Towards novel tacrine analogues: Pd(dppf)Cl2·CH2Cl2catalyzed improved synthesis,in silicodocking and hepatotoxicity studies
Source: Royal Society of Chemistry journal article supplement (doi:10.1039/d2ra03225b), 2022-01-01
Supplement: d2ra03225b1.pdf [file d2ra03225b1.pdf]

## Supporting Information

### **Towards novel tacrine analogues: Pd(dppf)Cl<sub>2</sub>·CH<sub>2</sub>Cl<sub>2</sub> catalyzed improved synthesis, *in Silico* docking and hepatotoxicity studies**

Aravinda Babu<sup>a</sup>, Muthipeedika Nibin Joy<sup>b</sup>, K. Sunil<sup>a\*</sup>, Ayyiliath Meleveetil Sajith<sup>a\*</sup>, Sougata Santra<sup>b</sup>, Grigory V. Zyryanov<sup>b,c</sup>, Olga A. Konovalova<sup>b</sup>, Ilya I. Butorin<sup>b</sup>, Keesaram Muniraju<sup>d</sup>

<sup>a</sup>Department of Chemistry, SSIT, Sri Siddhartha Academy of Higher Education, Tumkur, Karnataka, India-572107.

<sup>b</sup>Institute of Chemical Technology, Ural Federal University, 19 Mira Street, Yekaterinburg, Russia-620002.

<sup>c</sup>I. Ya. Postovskiy Institute of Organic Synthesis, Ural Division of the Russian Academy of Sciences, 22 S. Kovalevskoy Street, Yekaterinburg, Russia-620219.

<sup>d</sup>Government Degree College-Puttur (Affiliated to S.V. University, Tirupati), Narayanavanam Road, Puttur, Chittoor (Dt), Andhra Pradesh, India-517583.

Address of the corresponding author: Dr. K. Sunil; Dr. Ayyiliath Meleveetil Sajith

Email: sunilk999@gmail.com; sajithmeleveetil@gmail.com

Ph: +91-9480146151

## Contents:

|                               |       |
|-------------------------------|-------|
| 1. General information .....  | 2-3   |
| 2. Experimental section ..... | 3-28  |
| 3. References .....           | 28    |
| 4. Spectral Data .....        | 29-76 |

### General information

All experiments were set-up on fume hoods and were carried out under nitrogen atmosphere in Schlenk tubes unless otherwise noted. All solvents and reagents were procured from commercially available sources like Aldrich, Combi-bolcks and Spectrochem. Commercially available neutral alumina was used for column chromatography and all the synthesized molecules were purified by using solvents such as hexane, ethyl acetate, dichloromethane or methanol.  $^1\text{H}$  NMR was recorded on Bruker 400MHz AVANCE series or Bruker300 MHz DPX Spectrometer with  $\text{DMSO-}d_6$  or  $\text{CD}_3\text{OD}$  as the solvent. All NMR chemical shifts were reported in parts per million (ppm) and all coupling constants are reported in Hertz (Hz). Tetramethylsilane (TMS) ( $\delta = 0.00$  ppm) or residual solvent peak in  $\text{DMSO-}d_6$  ( $\delta = 2.50$  ppm) and  $\text{CDCl}_3$  ( $\delta = 7.26$  ppm) served as internal standard for recording [1]. Multiplicities are abbreviated as follows: singlet (s), doublet (d), triplet

(t), quartet (q), doublet-doublet (dd), multiplet (m), and broad (br). Liquid chromatography-mass spectrometry (LC-MS) was used for reaction monitoring and identification for product mass on Agilent 1100 Series LC/MSD mass spectrometer. Microanalyses were performed on PerkinElmer Series II CHNS/O 2400 elemental analyzer. Melting points were determined using a Stuart SMP 3 apparatus. Thin-layer chromatography (TLC) was performed using Merck silica gel 60 F<sub>254</sub> TLC plates.

## **Experimental section**

### **Synthesis of 6-bromo tacrine 1**

The synthesis of 6-bromo tacrine scaffold **1** was carried out according to the previously reported procedure [2].

### **Procedure for the synthesis of 6-borylated tacrine derivative 3**

To a solution of **1** (0.27 g, 1 mmol, 1.0 equiv) in 1,4-dioxane (2 mL) and water (1 mL), 4,4,4',4',5,5,5',5'-octamethyl-2,2'-bi(1,3,2-dioxaborolane) (**2**) (0.38 g, 1.5 mmol, 1.5 equiv) and K<sub>2</sub>CO<sub>3</sub> (0.35 g, 2.5 mmol, 2.5 equiv) was added. The mixture was degassed for 10 min under N<sub>2</sub> atmosphere and then Pd(dppf)Cl<sub>2</sub>.DCM (0.04 g, 0.05 mmol, 0.05 equiv) was added. The reaction mixture was heated at 100°C for 8h. After the specified time, the reaction mixture was filtered through celite bed,

the filtrate was diluted with water (10 mL) and extracted with ethyl acetate (2 x 10 mL). The organic layers separated was dried over anhydrous Na<sub>2</sub>SO<sub>4</sub>, filtered and concentrated under reduced pressure. The crude was washed with dichloromethane to yield *B6-(4,4,5,5-tetramethyl-1,3,2-dioxaborolan-2-yl)-1,2,3,4-tetrahydroacridin-9-amine* **3** (0.24 g, 73%) as off-white solid.

Mp 117-120°C.

<sup>1</sup>H NMR (400 MHz, DMSO-*d*<sub>6</sub>): δ 8.11 (d, *J* = 8.6 Hz, 1H, ArH), 7.90 (s, 1H, ArH), 7.51 (dd, *J* = 8.5, 1.2 Hz, 1H, ArH), 6.78 (s, 2H, NH<sub>2</sub>), 2.85 (t, *J* = 5.8 Hz, 2H, CH<sub>2</sub>), 2.55 (s, 2H, CH<sub>2</sub>), 1.81 (m, 4H, CH<sub>2</sub>), 1.05 (s, 12H, CH<sub>3</sub>).

<sup>13</sup>C NMR (100 MHz, DMSO-*d*<sub>6</sub>): δ 159.7, 155.6, 151, 136.7, 131.2, 128.6, 119.9, 115.5, 114.8, 109.4, 55.7, 28.1, 23.0, 21.2.

LC-MS: 325.43 (M+H).

Anal. Calculated for C<sub>19</sub>H<sub>25</sub>BN<sub>2</sub>O<sub>2</sub>: C, 74.08; H, 6.09; N, 10.02; Found: C, 73.9; H, 6.45; N, 9.75%.

**Procedure for Suzuki-Miyaura coupling of 3 with aryl bromides for the synthesis of 6-arylated tacrine derivatives**

**7a-c**

To a mixture of **3** (0.32 g, 1 mmol, 1.0 equiv) in 1,4-dioxane (2 mL) and water (1 mL), different aryl bromides **4a-c** (1.2 mmol, 1.2 equiv) and K<sub>2</sub>CO<sub>3</sub> (0.35 g, 2.5 mmol, 2.5 equiv) were added. The mixture was degassed for 10 min. under N<sub>2</sub> atmosphere and Pd(dppf)Cl<sub>2</sub>.DCM (0.04 g, 0.05 mmol, 0.05 equiv) was then added. The reaction mixture was heated at 100°C for 8-10 hours. After the completion of the reaction as monitored by TLC, the reaction mixture was filtered through celite bed and the filtrate was diluted with water (20 mL) and extracted with ethyl acetate (2 x 20 mL). The combined organic layers was dried over anhydrous Na<sub>2</sub>SO<sub>4</sub>, filtered and distilled under reduced pressure. The crude was washed with dichloromethane (DCM) twice to afford the titled 6-arylated tacrine derivatives **7a-c** in varying yields (The products were partially soluble in DCM, however this method was convenient as column chromatography was not required).

*6-(3-Fluorophenyl)-1,2,3,4-tetrahydroacridin-9-amine (7a)*

Yield=78% (0.23 g); off white solid.

Mp 160-164°C.

<sup>1</sup>H NMR (400 MHz, DMSO-*d*<sub>6</sub>): δ 14.11 (d, *J* = 33.5 Hz, 1H, ArH), 9.09 (s, 1H, ArH), 8.79 (s, 1H, ArH), 8.11 (d, *J* = 8.6 Hz, 1H, ArH), 7.97 (d, *J* = 8.2 Hz, 1H, ArH), 7.74 (s, 2H, NH<sub>2</sub>), 7.48 (dt, *J* = 14.3, 7.1 Hz, 1H, ArH), 7.18 (t, *J* = 7.7 Hz, 1H, ArH), 2.93 (s, 2H, CH<sub>2</sub>), 2.55 (s, 2H, CH<sub>2</sub>), 1.78 (s, 4H, CH<sub>2</sub>).

$^{13}\text{C}$  NMR (100 MHz, DMSO- $d_6$ ):  $\delta$  164.3 ( $J = 242$  Hz), 155.7, 151.3, 141.0 ( $J = 8$  Hz), 136.9, 135.5, 131.3, 131.2 ( $J = 8$  Hz), 123.3, 121.2, 120.1, 115.3, 114.9, 113.9, 109.5, 28.1, 23.0, 21.1.

LC-MS: 293.4 (M+H).

Anal. Calculated for  $\text{C}_{19}\text{H}_{17}\text{FN}_2$ : C, 78.06; H, 5.86; N, 9.58; Found: C, 78.41; H, 6.06; N, 9.20%.

*6-(3,5-Difluorophenyl)-1,2,3,4-tetrahydroacridin-9-amine (7b)*

Yield=78% (0.24 g); off white solid.

Mp 152-155°C.

$^1\text{H}$  NMR (400 MHz, DMSO- $d_6$ ):  $\delta$  14.07 (s, 1H, ArH), 9.02 (d,  $J = 48.9$  Hz, 1H, ArH), 8.78 (d,  $J = 19.9$  Hz, 1H, ArH), 8.14 (d,  $J = 8.9$  Hz, 2H, ArH), 7.90 (d,  $J = 8.7$  Hz, 1H, ArH), 7.63 (d,  $J = 7.6$  Hz, 2H,  $\text{NH}_2$ ), 7.21 (t,  $J = 8.8$  Hz, 1H, ArH), 2.94 (s, 2H,  $\text{CH}_2$ ), 2.48 (s, 2H,  $\text{CH}_2$ ), 1.81 (s, 4H,  $\text{CH}_2$ ).

$^{13}\text{C}$  NMR (100 MHz, DMSO- $d_6$ ):  $\delta$  164.5 ( $J = 14$  Hz, 244 Hz), 155.7, 151.5, 141.9, 137.2, 134.1, 131.2, 121.5, 120.0, 115.1, 110.4 ( $J = 26$  Hz), 109.7, 103.6 ( $J = 26$  Hz), 28.1, 22.9, 21.4, 20.9.

LC-MS: 311.4 (M+H).

Anal. Calculated for  $\text{C}_{19}\text{H}_{16}\text{F}_2\text{N}_2$ : C, 73.53; H, 5.20; N, 9.03; Found: C, 73.33; H, 4.82; N, 9.01%.

*6-(4-Chlorophenyl)-1,2,3,4-tetrahydroacridin-9-amine (7c)*

Yield=73% (0.23 g); off white solid.

Mp 168-172°C.

<sup>1</sup>H NMR (400 MHz, DMSO-*d*<sub>6</sub>): δ 14.09 (s, 1H, ArH), 9.14 (s, 1H, ArH), 8.87 (s, 1H, ArH), 8.20 (d, *J* = 8.6 Hz, 1H, ArH), 8.03 (t, *J* = 8.7 Hz, 1H, ArH), 7.94 (d, *J* = 8.3 Hz, 2H, ArH), 7.58 (d, *J* = 8.3 Hz, 2H, NH<sub>2</sub>), 3.00 (s, 2H, CH<sub>2</sub>), 2.55 (s, 2H, CH<sub>2</sub>), 1.85 (s, 4H, CH<sub>2</sub>).

<sup>13</sup>C NMR (100 MHz, DMSO-*d*<sub>6</sub>): δ 155.8, 151.6, 137.5, 136.9, 135.9, 133.4, 131.6, 129.2, 121.2, 120.1, 115.5, 109.7, 28.1, 23.1, 21.2.

LC-MS: 310.8 (M+2H).

Anal. Calculated for C<sub>19</sub>H<sub>17</sub>ClN<sub>2</sub>: C, 73.90; H, 5.55; N, 9.07; Found: C, 74.03; H, 5.19; N, 9.08%.

**Procedure for Suzuki-Miyaura coupling of 1 with aryl boronic acids for the synthesis of 6-arylated tacrine derivatives 7a-e**

To a solution of **1** (0.27 g, 1 mmol, 1.0 equiv) in 1,4-dioxane (2 mL) and water (1 mL), various boronic acids **5a-e** (1.2 mmol, 1.2 equiv) and K<sub>2</sub>CO<sub>3</sub> (0.35 g, 2.5 mmol, 2.5 equiv) was added. The mixture was degassed for 10 min. under N<sub>2</sub>

atmosphere and Pd(dppf)Cl<sub>2</sub>.DCM (0.04 g, 0.05 mmol, 0.05 equiv) was then added. The reaction mixture was heated at 100°C for 8-10 hours. After the completion of the reaction as monitored by TLC, the reaction mixture was filtered through celite bed and the filtrate was diluted with water (20 mL) and extracted with ethyl acetate (2 x 20 mL). The combined organic layers was dried over anhydrous Na<sub>2</sub>SO<sub>4</sub>, filtered and distilled off under reduced pressure to obtain the crude product. The crude was washed with dichloromethane to obtain the entitled 6-arylated tacrine derivatives **7a-e** in varying yields (The products were partially soluble in DCM, however this method was convenient as column chromatography was not required).

*6-(3-Fluorophenyl)-1,2,3,4-tetrahydroacridin-9-amine (7a)*

Yield=84% (0.25 g); off white solid.

*6-(3,5-Difluorophenyl)-1,2,3,4-tetrahydroacridin-9-amine (7b)*

Yield=80% (0.25 g); off white solid.

*6-(4-Chlorophenyl)-1,2,3,4-tetrahydroacridin-9-amine (7c)*

Yield=87% (0.27 g); off white solid.



*6-(4-Methoxyphenyl)-1,2,3,4-tetrahydroacridin-9-amine (7d)*

Yield=80% (0.24 g); off white solid.

Mp 170-173°C.

<sup>1</sup>H NMR (400 MHz, DMSO-*d*<sub>6</sub>): δ 14.02 (s, 1H, ArH), 8.91 (s, 1H, ArH), 8.55 (d, *J* = 8.8 Hz, 1H, ArH), 8.11 (s, 1H, ArH), 8.02 (dd, *J* = 18.8, 8.4 Hz, 1H, ArH), 7.84 (d, *J* = 8.8 Hz, 1H, ArH), 7.71 (d, *J* = 8.6 Hz, 2H, ArH), 7.07 (t, *J* = 9.9 Hz, 2H, ArH), 3.82 (s, 3H, OCH<sub>3</sub>), 2.98 (s, 2H, CH<sub>2</sub>), 2.52 (s, 2H, CH<sub>2</sub>), 1.83 (s, 4H, CH<sub>2</sub>).

<sup>13</sup>C NMR (100 MHz, DMSO-*d*<sub>6</sub>): δ 160.5, 155.5, 151.7, 143.9, 138.1, 130.6, 128.7, 124.4 (d, *J* = 30.8 Hz), 115.2, 113.8, 109.3, 55.8, 28.2, 21.1 (d, *J* = 53.8 Hz).

LC-MS: 305.2 (M+H).

Anal. Calculated for C<sub>20</sub>H<sub>20</sub>N<sub>2</sub>O: C, 78.92; H, 6.62; N, 9.20; Found: C, 79.12; H, 6.98; N, 9.60%.

*6-(3-Methoxyphenyl)-1,2,3,4-tetrahydroacridin-9-amine (7e)*

Yield=78% (0.23 g); off white solid.

Mp 171-174°C.

$^1\text{H}$  NMR (400 MHz,  $\text{DMSO-}d_6$ ):  $\delta$  14.11 (s, 1H, ArH), 9.05 (s, 1H, ArH), 8.76 (s, 1H, ArH), 8.12 (d,  $J = 8.7$  Hz, 1H, ArH), 7.99 (d,  $J = 8.8$  Hz, 1H, ArH), 7.85 (d,  $J = 8.4$  Hz, 2H, ArH), 7.05 (d,  $J = 8.4$  Hz, 2H, ArH), 3.82 (s, 3H,  $\text{OCH}_3$ ), 2.97 (s, 2H,  $\text{CH}_2$ ), 2.52 (d,  $J = 7.2$  Hz, 2H,  $\text{CH}_2$ ), 1.82 (d,  $J = 3.2$  Hz, 4H,  $\text{CH}_2$ ).

$^{13}\text{C}$  NMR (100 MHz,  $\text{DMSO-}d_6$ ):  $\delta$  159.8, 155.7, 151.1, 136.7 (d,  $J = 74.1$  Hz), 131.2 (d,  $J = 33.9$  Hz), 128.6, 120.0, 115.6, 114.8, 109.4, 55.7, 28.1, 23.1, 21.2 (d,  $J = 55.8$  Hz).

LC-MS: 305.2 (M+H).

Anal. Calculated for  $\text{C}_{20}\text{H}_{20}\text{N}_2\text{O}$ : C, 78.92; H, 6.62; N, 9.20; Found: C, 78.84; H, 6.85; N, 9.62%.

**Procedure for Stille coupling of 1 with tributyl(aryl/vinyl)stannanes for the synthesis of 6-arylated tacrine derivatives 7d-h**

To a solution of **1** (0.27 g, 1 mmol, 1.0 equiv) in DMF (2 mL), different tributyl(aryl/vinyl)stannanes **6d-h** (1 mmol, 1.0 equiv) and NaCl (0.09 g, 1.5 mmol, 1.5 equiv) was added. The mixture was degassed for 10 min. under  $\text{N}_2$  atmosphere and  $\text{Pd}(\text{dppf})\text{Cl}_2\cdot\text{DCM}$  (0.04 g, 0.05 mmol, 0.05 equiv) was then added. The reaction mixture was heated at  $100^\circ\text{C}$  for 8-10 hours. After the completion of the reaction as indicated by TLC, the reaction mixture was filtered through celite bed and the filtrate was distilled off under reduced pressure. The residue obtained was purified by column chromatography in neutral

alumina using 1-5% methanol in dichloromethane as eluent to obtain the entitled 6-arylated tacrine derivatives **7d-h** in varying yields.

*6-(4-Methoxyphenyl)-1,2,3,4-tetrahydroacridin-9-amine (7d)*

Yield=80% (0.24 g); off white solid.

*6-(3-Methoxyphenyl)-1,2,3,4-tetrahydroacridin-9-amine (7e)*

Yield=78% (0.23 g); off white solid.

*6-(1-Ethoxyvinyl)-1,2,3,4-tetrahydroacridin-9-amine (7f)*

Yield=88% (0.24 g); off white solid.

Mp 160-163°C.

$^1\text{H}$  NMR (400 MHz, DMSO- $d_6$ ):  $\delta$  8.08 (d,  $J$  = 8.8 Hz, 1H, ArH), 7.84 (s, 1H, ArH), 7.48 (t,  $J$  = 11.4 Hz, 1H, ArH), 6.30 (s, 2H, NH<sub>2</sub>), 4.88 (d,  $J$  = 2.0 Hz, 1H, CH<sub>2</sub>), 4.33 (d,  $J$  = 2.0 Hz, 1H, CH<sub>2</sub>), 3.90 (q,  $J$  = 6.8 Hz, 2H, OCH<sub>2</sub>), 2.79 (d,  $J$  = 5.7 Hz, 2H, CH<sub>2</sub>), 2.52 (d,  $J$  = 5.5 Hz, 2H, CH<sub>2</sub>), 1.79 (d,  $J$  = 4.9 Hz, 4H, CH<sub>2</sub>), 1.41 (t,  $J$  = 7.0 Hz, 3H, CH<sub>3</sub>).

$^{13}\text{C}$  NMR (100 MHz, DMSO- $d_6$ ):  $\delta$  158.2, 148.2, 146.7, 135.4, 124.3, 122.2, 120.1, 117.2, 109.6, 83.9, 63.3, 34.2, 24.1, 23.1, 14.8.

LC-MS: 269.4 (M+H).

Anal. Calculated for C<sub>17</sub>H<sub>20</sub>N<sub>2</sub>O: C, 76.09; H, 7.51; N, 10.44; Found: C, 76.03; H, 7.72; N, 10.24%.

*6-Allyl-1,2,3,4-tetrahydroacridin-9-amine (7g)*

Yield=73% (0.17 g); Off-white solid.

Mp 136-143°C.

<sup>1</sup>H NMR (400 MHz, DMSO-*d*<sub>6</sub>): δ 8.08 (d, *J* = 8.6 Hz, 1H, ArH), 7.42 (d, *J* = 1.7 Hz, 1H, ArH), 7.14 (dd, *J* = 8.6 Hz, 1.8 Hz, 1H, ArH), 6.4 (m, 2H, NH<sub>2</sub>), 6.03 (m, 1H, CH), 5.19-5.06 (m, 2H, CH<sub>2</sub>), 3.48 (d, *J* = 6.8 Hz, 1H, CH<sub>2</sub>), 2.81 (t, *J* = 5.8 Hz, 2H, CH<sub>2</sub>), 2.54 (t, *J* = 5.8 Hz, 2H, CH<sub>2</sub>), 1.89 (p, *J* = 6.1, 5.7 Hz, 4H, CH<sub>2</sub>).

<sup>13</sup>C NMR (100 MHz, DMSO-*d*<sub>6</sub>): δ 157.3, 148.9, 140.3, 137.9, 126.4, 124.5, 122.5, 116.5, 115.8, 109.1, 37.7, 33.6, 25.1, 24.2, 23.9, 22.9, 22.9, 21.4.

LC-MS: 239.2 (M+H).

Anal. Calculated for C<sub>16</sub>H<sub>18</sub>N<sub>2</sub>: C, 80.63; H, 7.61; N, 11.75; Found: C, 80.99; H, 7.44; N, 11.92%.

*6-(3-Fluoropyridin-2-yl)-1,2,3,4-tetrahydroacridin-9-amine (7h)*

Yield=70% (0.205 g); Brown solid.

Mp 121-123°C.

<sup>1</sup>H NMR (400 MHz, DMSO-*d*<sub>6</sub>): δ 8.37 - 8.34 (m, 2H, ArH), 8.29 (d, *J* = 8.8 Hz, 1H, ArH), 7.91 - 7.78 (m, 2H, ArH), 7.44 (m, 1H, ArH), 6.51 (s, 2H, NH<sub>2</sub>), 2.88 (t, *J* = 5.8 Hz, 2H, CH<sub>2</sub>), 2.57 (t, *J* = 5.8 Hz, 2H, CH<sub>2</sub>), 1.82 (p, *J* = 6.1, 5.7 Hz, 4H, CH<sub>2</sub>).

<sup>13</sup>C NMR (100 MHz, DMSO-*d*<sub>6</sub>): δ 162.1, 158.1, 148.5, 146.1, 145.8, 136.2, 134.3, 133.2, 129.4, 126.7, 125.7, 125, 119.5, 114.7, 110.9, 34.1, 24.3, 23, 22.8.

LC-MS: 294.2 (M+H).

Anal. Calculated for C<sub>18</sub>H<sub>16</sub>FN<sub>3</sub>: C, 73.70; H, 5.50; N, 14.32; Found: C, 73.75; H, 5.64; N, 14.5%.

**Procedure for Sonogashira coupling of 1 with alkynes for the synthesis of 6-alkynyl tacrine derivatives 9a-d**

To a solution of **1** (0.27 g, 1 mmol, 1.0 equiv) in DMF (2 mL), different alkynes **8a-d** (1.2 mmol, 1.2 equiv), CuI (0.19 g, 1 mmol, 1.0 equiv) and triethylamine (0.28 mL, 2 mmol, 2.0 equiv) was added. The mixture was degassed for 10 min. under

N<sub>2</sub> atmosphere and Pd(dppf)Cl<sub>2</sub>.DCM (0.04 g, 0.05 mmol, 0.05 equiv) was then added. The reaction mixture was heated at 100°C for 8-10 hours. After the completion of the reaction as indicated by TLC, the reaction mixture was filtered through celite bed and the filtrate was concentrated under reduced pressure. The residue obtained was purified by column chromatography in neutral alumina using 1-5% methanol in dichloromethane as eluent to obtain the entitled 6-alkynyl tacrine derivatives **9a-d** in varying yields.

*6-((4-Fluorophenyl)ethynyl)-1,2,3,4-tetrahydroacridin-9-amine (9a)*

Yield=88% (0.28 g); off white solid.

Mp 132-135°C.

<sup>1</sup>H NMR (400 MHz, DMSO-*d*<sub>6</sub>): δ 8.16 (d, *J* = 8.5 Hz, 1H, ArH), 7.77 (s, 1H), 7.62 (d, *J* = 5.6 Hz, 2H, ArH), 7.36 (d, *J* = 8.3 Hz, 1H, ArH), 7.26 (t, *J* = 8.4 Hz, 2H, ArH), 6.39 (s, 2H, NH<sub>2</sub>), 2.81 (s, 2H, CH<sub>2</sub>), 2.53 (s, 2H, CH<sub>2</sub>), 1.79 (d, *J* = 4.7 Hz, 4H, CH<sub>2</sub>).

<sup>13</sup>C NMR (100 MHz, DMSO-*d*<sub>6</sub>): δ 163.7 (*J* = 246 Hz), 158.9, 148.4, 146.4, 134.2 (*J* = 8 Hz), 131.5, 125.1, 123.1, 121.8, 119.2, 117.3, 116.5 (*J* = 21 Hz), 110.3, 89.8, 89.2, 34.1, 24.1, 23.0, 22.9.

LC-MS: 305.4 (M+H).

Anal. Calculated for C<sub>21</sub>H<sub>17</sub>FN<sub>2</sub>: C, 79.72; H, 5.42; N, 8.85; Found: C, 79.84; H, 5.50; N, 8.47%.

*6-((3-Chlorophenyl)ethynyl)-1,2,3,4-tetrahydroacridin-9-amine (9b)*

Yield=81% (0.27 g); off white solid.

Mp 139-142°C.

<sup>1</sup>H NMR (400 MHz, DMSO-*d*<sub>6</sub>): δ 8.18 (d, *J* = 8.7 Hz, 1H, ArH), 7.80 (s, 1H, ArH), 7.65 (s, 1H, ArH), 7.54 (d, *J* = 7.1 Hz, 1H, ArH), 7.50 – 7.41 (m, 2H, ArH), 7.38 (dd, *J* = 8.6, 1.1 Hz, 1H, ArH), 6.39 (s, 2H, NH<sub>2</sub>), 2.82 (d, *J* = 5.6 Hz, 2H, CH<sub>2</sub>), 2.53 (d, *J* = 5.8 Hz, 2H, CH<sub>2</sub>), 1.80 (d, *J* = 4.9 Hz, 4H, CH<sub>2</sub>).

<sup>13</sup>C NMR (100 MHz, DMSO-*d*<sub>6</sub>): δ 159.1, 148.4, 146.4, 133.7, 131.8, 131.1, 131.1, 130.5, 129.3, 125.1, 124.7, 123.2, 121.4, 91.4, 88.7, 63.2, 34.1, 24.2, 22.9.

LC-MS: 334.4 (M+2H).

Anal. Calculated for C<sub>21</sub>H<sub>17</sub>ClN<sub>2</sub>: C, 75.78; H, 5.15; N, 8.42; Found: C, 76.16; H, 5.28; N, 8.20%.

*6-((4-Chlorophenyl)ethynyl)-1,2,3,4-tetrahydroacridin-9-amine (9c)*

Yield=84% (0.28 g); off white solid.

Mp 141-144°C.

<sup>1</sup>H NMR (400 MHz, DMSO-*d*<sub>6</sub>): δ 8.17 (d, *J* = 8.6 Hz, 1H, ArH), 7.79 (s, 1H, ArH), 7.58 (d, *J* = 8.2 Hz, 2H, ArH), 7.47 (d, *J* = 8.3 Hz, 2H, ArH), 7.37 (d, *J* = 8.4 Hz, 1H, ArH), 6.41 (s, 2H, NH<sub>2</sub>), 2.81 (d, *J* = 5.6 Hz, 2H, CH<sub>2</sub>), 2.53 (d, *J* = 5.6 Hz, 2H, CH<sub>2</sub>), 1.79 (d, *J* = 4.8 Hz, 4H, CH<sub>2</sub>).

<sup>13</sup>C NMR (100 MHz, DMSO-*d*<sub>6</sub>): δ 159.1, 148.4, 146.4, 133.8, 131.8, 131.3, 131.1, 130.5, 129.3, 125.1, 124.8, 123.2, 121.4, 91.4, 88.7, 63.2, 34.1, 24.2, 22.9.

LC-MS: 334.4 (M+2H).

Anal. Calculated for C<sub>21</sub>H<sub>17</sub>ClN<sub>2</sub>: C, 75.78; H, 5.15; N, 8.42; Found: C, 76.16; H, 5.28; N, 8.20%.

*6-(Pyridin-2-ylethynyl)-1,2,3,4-tetrahydroacridin-9-amine (9d)*

Yield=78% (0.23 g); off white solid.



Mp 130-133°C.

<sup>1</sup>H NMR (400 MHz, DMSO-*d*<sub>6</sub>): δ 8.60 (d, *J* = 4.2 Hz, 1H, ArH), 8.20 (d, *J* = 8.6 Hz, 1H, ArH), 7.84 (t, *J* = 6.6 Hz, 2H, ArH), 7.66 (d, *J* = 7.7 Hz, 1H, ArH), 7.40 (t, *J* = 7.1 Hz, 2H, ArH), 6.44 (s, 2H, NH<sub>2</sub>), 2.82 (d, *J* = 5.5 Hz, 2H, CH<sub>2</sub>), 2.54 (d, *J* = 5.7 Hz, 2H, CH<sub>2</sub>), 1.79 (d, *J* = 4.9 Hz, 4H, CH<sub>2</sub>).

<sup>13</sup>C NMR (100 MHz, DMSO-*d*<sub>6</sub>): δ 159.1, 150.5, 148.4, 146.3, 142.7, 137.2, 132.1, 127.8, 125.1, 123.9, 123.3, 121.1, 117.7, 110.6, 89.8, 89.1, 34.1, 24.2, 22.9.

LC-MS: 300.4 (M+2H).

Anal. Calculated for C<sub>20</sub>H<sub>17</sub>N<sub>3</sub>: C, 80.24; H, 5.72; N, 14.04; Found: C, 80.31; H, 6.01; N, 13.95%.

### **Procedure for Heck coupling of 1 with alkenes for the synthesis of 6-alkenyl tacrine derivatives 11a-d**

A mixture of **1** (0.27 g, 1 mmol, 1.0 equiv), alkenes **10a-d** (1.2 mmol, 1.2 equiv), triethylamine (0.42 mL, 3 mmol, 3.0 equiv) and Pd(dppf)Cl<sub>2</sub>.DCM (0.04 g, 0.05 mmol, 0.05 equiv) in DMF (2 mL) was heated at 100°C for 8-10 hours. After the completion of the reaction as indicated by TLC, the reaction mixture was filtered through celite bed and the filtrate was

concentrated under reduced pressure. The residue obtained was purified by column chromatography in neutral alumina using 1-6% methanol in dichloromethane as eluent to obtain the titled compounds **11a-d** in varying yields.

*Methyl 3-(9-amino-5,6,7,8-tetrahydroacridin-3-yl)acrylate (11a)*

Yield=77% (0.22 g); off white solid.

Mp 128 -131°C.

<sup>1</sup>H NMR (400 MHz, DMSO-*d*<sub>6</sub>): δ 8.15 (d, *J* = 8.8 Hz, 1H, ArH), 7.85 (s, 1H, ArH), 7.75 (d, *J* = 16.0 Hz, 1H, CH), 7.64 (d, *J* = 8.6 Hz, 1H, ArH), 6.72 (d, *J* = 16.0 Hz, 1H, CH), 6.35 (s, 2H, NH<sub>2</sub>), 3.72 (s, 3H), 2.80 (d, *J* = 6.1 Hz, 2H, CH<sub>2</sub>), 2.53 (d, *J* = 5.7 Hz, 2H, CH<sub>2</sub>), 1.80 (d, *J* = 5.1 Hz, 4H, CH<sub>2</sub>).

<sup>13</sup>C NMR (100 MHz, DMSO-*d*<sub>6</sub>): δ 167.1, 158.6, 148.3, 146.7, 145.3, 133.8, 130.4, 123.2, 120.8, 118.5, 110.5, 51.8, 33.9, 24.2, 22.9.

LC-MS: 283.4 (M+H).

Anal. Calculated for C<sub>17</sub>H<sub>18</sub>N<sub>2</sub>O<sub>2</sub>: C, 72.32; H, 6.43; N, 9.92; Found: C, 72.49; H, 6.39; N, 9.55%.

*Ethyl 3-(9-amino-5,6,7,8-tetrahydroacridin-3-yl)acrylate (11b)*

Yield=80% (0.24 g); off white solid.

Mp 131-134°C.

<sup>1</sup>H NMR (400 MHz, DMSO-*d*<sub>6</sub>): δ 8.13 (d, *J* = 8.8 Hz, 1H, ArH), 7.84 (s, 1H, ArH), 7.73 (d, *J* = 16.0 Hz, 1H, CH), 7.65 (d, *J* = 8.6 Hz, 1H, ArH), 6.71 (d, *J* = 16.0 Hz, 1H, CH), 6.37 (s, 2H, NH<sub>2</sub>), 4.18 (q, *J* = 7.0 Hz, 2H, OCH<sub>2</sub>), 2.80 (d, *J* = 5.4 Hz, 2H, CH<sub>2</sub>), 2.53 (d, *J* = 5.6 Hz, 2H, CH), 1.79 (d, *J* = 4.9 Hz, 4H, CH<sub>2</sub>), 1.24 (t, *J* = 7.0 Hz, 3H, CH<sub>3</sub>).

<sup>13</sup>C NMR (100 MHz, DMSO-*d*<sub>6</sub>): δ 166.7, 158.6, 148.3, 146.8, 144.9, 133.9, 130.5, 123.2, 120.8, 118.8, 118.3, 110.5, 60.4, 34.1, 24.1, 22.9, 14.6.

LC-MS: 297.4 (M+H).

Anal. Calculated for C<sub>18</sub>H<sub>20</sub>N<sub>2</sub>O<sub>2</sub>: C, 72.95; H, 6.80; N, 9.45; Found: C, 72.75; H, 7.08; N, 9.57%.

*Tert-butyl 3-(9-amino-5,6,7,8-tetrahydroacridin-3-yl)acrylate (11c)*

Yield=75% (0.24 g); off white solid.

Mp 133-135°C.

<sup>1</sup>H NMR (400 MHz, DMSO-*d*<sub>6</sub>): δ 8.16 (d, *J* = 8.8 Hz, 1H, ArH), 7.84 (s, 1H, ArH), 7.73 (d, *J* = 16.0 Hz, 1H, CH), 7.65 (d, *J* = 8.6 Hz, 1H, ArH), 6.63 (d, *J* = 16.0 Hz, 1H, CH), 6.39 (s, 2H, NH<sub>2</sub>), 2.80 (d, *J* = 5.4 Hz, 2H, CH<sub>2</sub>), 2.53 (d, *J* = 5.6 Hz, 2H, CH<sub>2</sub>), 1.79 (d, *J* = 4.9 Hz, 4H, CH<sub>2</sub>), 1.5 (s, 9H, CH<sub>3</sub>).

<sup>13</sup>C NMR (100 MHz, DMSO-*d*<sub>6</sub>): δ 166.1, 158.7, 144.2, 134.1, 130.4, 120.7, 120.6, 118.3, 110.5, 80.4, 34.1, 28.4, 24.2, 23.1, 22.9.

LC-MS: 325.2 (M+H).

Anal. Calculated for C<sub>20</sub>H<sub>24</sub>N<sub>2</sub>O<sub>2</sub>: C, 74.04; H, 7.46; N, 8.64; Found: C, 73.96; H, 7.08; N, 8.81%.

*6-Styryl-1,2,3,4-tetrahydroacridin-9-amine (11d)*

Yield=78% (0.23 g); off white solid.

Mp 135-137°C.

$^1\text{H}$  NMR (400 MHz, DMSO- $d_6$ ):  $\delta$  8.16 (d,  $J = 8.8$  Hz, 1H, CH), 7.75 (s, 1H, ArH), 7.66 (d,  $J = 7.5$  Hz, 3H, ArH), 7.44-7.37 (m, 4H, ArH), 7.29 (t,  $J = 7.5$  Hz, 1H, CH), 6.63 (s, 2H, NH<sub>2</sub>), 2.88 (d,  $J = 5.4$  Hz, 2H, CH<sub>2</sub>), 2.55 (d,  $J = 6.3$  Hz, 2H, CH<sub>2</sub>), 1.83 (d,  $J = 4.9$  Hz, 4H, CH<sub>2</sub>).

$^{13}\text{C}$  NMR (100 MHz, DMSO- $d_6$ ):  $\delta$  158.3, 148.4, 147.4, 137.6, 136.9, 129.4, 129.2, 129.1, 128.1, 127.1, 127.1, 122.8, 120.5, 116.9, 109.7, 34.1, 24.2, 23.3, 23.1.

LC-MS: 301.4 (M+H).

Anal. Calculated for C<sub>21</sub>H<sub>20</sub>N<sub>2</sub>: C, 83.96; H, 6.71; N, 9.33; Found: C, 84.33; H, 6.92; N, 9.71%.

### **Procedure for Buchwald coupling of 1 with amines for the synthesis of 6-amino tacrine derivatives 13a-g**

To a solution of **1** (0.27 g, 1 mmol, 1.0 equiv) in 1,4-dioxane (2 mL), amines **12a-g** (1.3 mmol, 1.3 equiv) and KO $t$ -Bu (0.45 g, 4 mmol, 4.0 equiv) was added. The reaction mixture was degassed for 10 min. under N<sub>2</sub> atmosphere and then Pd(dppf)Cl<sub>2</sub>.DCM (0.04 g, 0.05 mmol, 0.05 equiv) was added. The reaction mixture was heated at 100°C for 8-10 hours. After completion of the reaction as indicated by TLC, the reaction mixture was filtered through celite bed and the filtrate

was concentrated under reduced pressure. The residue obtained was purified by column chromatography in neutral alumina using 5-8% methanol in dichloromethane as eluent to obtain the entitled 6-amino tacrine derivatives **13a-g** in varying yields.

*N*3-(4-methoxybenzyl)-5,6,7,8-tetrahydroacridine-3,9-diamine (**13a**)

Yield=72% (0.24 g); brown solid.

Mp 146-149°C.

<sup>1</sup>H NMR (400 MHz, DMSO-*d*<sub>6</sub>): δ 8.44 (s, 1H, NH), 8.10 (d, *J* = 9.2 Hz, 1H, ArH), 7.84 (s, 2H, ArH), 7.52 – 7.43 (m, 1H, ArH), 7.27 (d, *J* = 8.4 Hz, 2H, ArH), 6.92 (d, *J* = 9.1 Hz, 1H, ArH), 6.86 (d, *J* = 8.5 Hz, 2H, ArH), 6.64 (s, 2H, NH<sub>2</sub>), 4.24 (d, *J* = 5.2 Hz, 2H, CH<sub>2</sub>), 3.69 (s, 3H, OCH<sub>3</sub>), 2.75 (d, *J* = 5.6 Hz, 2H, CH<sub>2</sub>), 2.41 (d, *J* = 5.6 Hz, 2H, CH<sub>2</sub>), 1.74 (d, *J* = 4.7 Hz, 4H, CH<sub>2</sub>).

<sup>13</sup>C NMR (100 MHz, DMSO-*d*<sub>6</sub>): δ 158.7, 154.7, 152.1, 149.9, 141.0, 130.9, 129.1, 124.4, 116.2, 114.2, 106.6 (d, *J* = 42.0 Hz), 94.8, 55.5, 45.9, 28.1, 22.7, 21.5 (d, *J* = 57.2 Hz).

LC-MS: 334.4 (M+H).

Anal. Calculated for C<sub>21</sub>H<sub>23</sub>N<sub>3</sub>O: C, 75.65; H, 6.95; N, 12.60; Found: C, 75.50; H, 6.84; N, 12.20%.

*N*-(4-(trifluoromethyl)benzyl)-5,6,7,8-tetrahydroacridine-3,9-diamine (**13b**)

Yield=80% (0.30 g); off white solid.

Mp 151-154°C.

<sup>1</sup>H NMR (400 MHz, DMSO-*d*<sub>6</sub>): δ 7.84 (s, 1H, NH), 7.69 (d, *J* = 8.0 Hz, 2H, ArH), 7.60 (d, *J* = 8.2 Hz, 2H, ArH), 6.8 (dd, *J* = 9.0 Hz, 1H, ArH), 6.67 (t, *J* = 6.1 Hz, 1H, ArH), 6.37 (d, *J* = 2.3 Hz, 1H, ArH), 6.08 (s, 2H, NH<sub>2</sub>), 4.24 (d, *J* = 5.2 Hz, 2H, CH<sub>2</sub>), 2.88 (d, *J* = 5.4 Hz, 2H, CH<sub>2</sub>), 2.45 (d, *J* = 6.3 Hz, 2H, CH<sub>2</sub>), 1.78 (m, 4H, CH<sub>2</sub>).

<sup>13</sup>C NMR (100 MHz, DMSO-*d*<sub>6</sub>): δ 166.9, 158.9, 148.4, 146.3, 145.1, 133.7, 128.4 (*J* = 32 Hz), 126.2, 125.6 (*J* = 292 Hz), 123.5, 121.2, 119.1, 110.6, 42.9, 34.1, 24.2, 23.0, 22.9.

LC-MS: 372.2 (M+H).

Anal. Calculated for C<sub>21</sub>H<sub>20</sub>F<sub>3</sub>N<sub>3</sub>: C, 67.91; H, 5.47; N, 11.31; Found: C, 67.93; H, 5.75; N, 11.62%.

*N*-(3-(trifluoromethyl)benzyl)-5,6,7,8-tetrahydroacridine-3,9-diamine (**13c**)

Yield=75% (0.28 g); off white solid.

Mp 150-152°C.

<sup>1</sup>H NMR (400 MHz, DMSO-*d*<sub>6</sub>): δ 7.84 (s, 1H, NH), 7.73 (d, *J* = 8.0 Hz, 2H, ArH), 7.62-7.56 (m, 3H, ArH), 6.81 (dd, *J* = 9.0 Hz, 1H, ArH), 6.68-6.57 ((m, 1H, ArH), 6.41 (d, *J* = 2.3 Hz, 1H, ArH), 6.06 (s, 2H, NH<sub>2</sub>), 4.45 (d, *J* = 6.0 Hz, 2H, CH<sub>2</sub>), 2.66 (d, *J* = 5.4 Hz, 2H, CH<sub>2</sub>), 2.45 (d, *J* = 6.3 Hz, 2H, CH<sub>2</sub>), 1.78 (m, 4H, CH<sub>2</sub>).

<sup>13</sup>C NMR (100 MHz, DMSO-*d*<sub>6</sub>): δ 170.1, 160.6, 160.1, 157.4, 145.9, 142.7, 141.9, 137.0, 136.7, 134.8 (*J* = 28 Hz), 129.1, 128.7, 124.0 (*J* = 274 Hz), 115.0, 47.6, 33.0, 27.8, 26.1, 25.6, 13.5.

LC-MS: 371.9 (M+H).

Anal. Calculated for C<sub>18</sub>H<sub>20</sub>N<sub>2</sub>O<sub>2</sub>: C, 67.91; H, 5.43; N, 11.31; Found: C, 67.55; H, 5.91; N, 12.15%.

*N*-(3,5-difluorobenzyl)-5,6,7,8-tetrahydroacridine-3,9-diamine (**13d**)

Yield=84% (0.28 g); off white solid.

Mp 139-143°C.



$^1\text{H}$  NMR (400 MHz, DMSO- $d_6$ ):  $\delta$  7.84 (s, 1H, NH), 7.09 (m, 3H, ArH), 6.79 (dd,  $J = 9.0$  Hz, 1H, ArH), 6.64-6.57 ((m, 1H, ArH), 6.41 (d,  $J = 2.4$  Hz, 1H, ArH), 6.03 (s, 2H, NH<sub>2</sub>), 4.39 (d,  $J = 6.0$  Hz, 2H, CH<sub>2</sub>), 2.67 (d,  $J = 5.4$  Hz, 2H, CH<sub>2</sub>), 2.45 (d,  $J = 6.3$  Hz, 2H, CH<sub>2</sub>), 1.78 (m, 4H, CH<sub>2</sub>).

$^{13}\text{C}$  NMR (100 MHz, DMSO- $d_6$ ):  $\delta$  163.6 ( $J = 242$  Hz), 158.9, 157.0, 156.5, 148.1, 147.8, 145.6, 122.5, 114.8 ( $J = 37$  Hz), 110.1, 109.7 ( $J = 32$  Hz), 106.1, 103.8, 45.6, 33.3, 24.2, 23.3, 22.7.

LC-MS: 339.8 (M+H).

Anal. Calculated for C<sub>20</sub>H<sub>19</sub>F<sub>2</sub>N<sub>3</sub>: C, 70.78; H, 5.64; N, 12.38; Found: C, 70.52; H, 5.94; N, 12.42%.

*N3-phenyl-5,6,7,8-tetrahydroacridine-3,9-diamine (13e)*

Yield=70% (0.20 g); Yellow solid.

Mp 140-144°C.

$^1\text{H}$  NMR (400 MHz,  $\text{DMSO-}d_6$ ):  $\delta$  8.78 (s, 1H, NH), 8.13 (d,  $J = 9.1$  Hz, 1H, ArH), 7.35 (dd,  $J = 8.2$  Hz, 7.2 Hz, 2H, ArH), 7.29-7.22 (m, 3H, ArH), 7.1 (m, 3H, ArH,  $\text{NH}_2$ ), 6.99 (t,  $J = 7.3$  Hz, 1H, ArH), 2.84 (d,  $J = 5.4$  Hz, 2H,  $\text{CH}_2$ ), 2.48 (d,  $J = 6.3$  Hz, 2H,  $\text{CH}_2$ ), 1.8 (m, 4H,  $\text{CH}_2$ ).

$^{13}\text{C}$  NMR (100 MHz,  $\text{DMSO-}d_6$ ):  $\delta$  153.8, 151.2, 146.2, 144.1, 142.3, 129.7, 124.3, 121.9, 119.3, 116.9, 109.8, 107.6, 103.2, 30.8, 23.3, 22.4, 22.1.

LC-MS: 290.2 (M+H).

Anal. Calculated for  $\text{C}_{19}\text{H}_{19}\text{N}_3$ : C, 78.86; H, 6.62; N, 14.52; Found: C, 79.18; H, 6.35; N, 14.63%.

*N3-methyl-N3-phenyl-5,6,7,8-tetrahydroacridine-3,9-diamine (13f)*

Yield=68% (0.21 g); Pale yellow solid.

Mp 143-146°C.

$^1\text{H}$  NMR (400 MHz,  $\text{DMSO-}d_6$ ):  $\delta$  8.04 (d,  $J = 9.1$  Hz, 1H, ArH), 7.41 (dd,  $J = 8.5$  Hz, 7.3 Hz, 2H, ArH), 7.23-7.19 (m, 3H, ArH), 6.96-6.92 (m, 3H, ArH,  $\text{NH}_2$ ), 3.36 (s, 3H,  $\text{CH}_3$ ), 2.78 (d,  $J = 5.9$  Hz, 2H,  $\text{CH}_2$ ), 2.48 (d,  $J = 6.3$  Hz, 2H,  $\text{CH}_2$ ), 1.82 (m, 4H,  $\text{CH}_2$ ).

$^{13}\text{C}$  NMR (100 MHz,  $\text{DMSO-}d_6$ ):  $\delta$  150.9, 149.8, 148.2, 130.1, 124.27, 124.3, 124.1, 123.6, 116.6, 107.8, 48.1, 31.8, 24.2, 23.4, 22.6, 22.4.

LC-MS: 304.2 (M+H).

Anal. Calculated for  $\text{C}_{20}\text{H}_{21}\text{N}_3$ : C, 79.17; H, 6.98; N, 13.85; Found: 78.91; H, 7.08; N, 13.46%.

*N*3-(3,5-difluoropyridin-2-yl)-5,6,7,8-tetrahydroacridine-3,9-diamine (**13g**)

Yield=79% (0.25 g); Off-white solid.

Mp 151-154°C.

$^1\text{H}$  NMR (400 MHz, DMSO- $d_6$ ):  $\delta$  9.07 (s, 1H, NH), 8.28 (d,  $J = 2.2$  Hz, 1H, ArH), 8.17 (d,  $J = 2.5$  Hz, 1H, ArH), 8.04 (d,  $J = 9.2$  Hz, 1H, ArH), 7.89 (m, 1H, ArH), 7.53 (dd,  $J = 9.1$  Hz, 2.3 Hz, 1H, ArH), 7.51 (t,  $J = 7.3$  Hz, 1H, ArH), 6.45 (s, 2H, NH<sub>2</sub>), 2.8 (d,  $J = 5.4$  Hz, 2H, CH<sub>2</sub>), 2.54 (d,  $J = 6.3$  Hz, 2H, CH<sub>2</sub>), 1.81 (m, 4H, CH<sub>2</sub>).

$^{13}\text{C}$  NMR (100 MHz, DMSO- $d_6$ ):  $\delta$  156.8 ( $J = 283$  Hz), 151.5 (2C), 149.3, 146.7, 145.1 ( $J = 282$  Hz), 142.3 ( $J = 9$  Hz), 141.2, 129.3 ( $J = 16$  Hz, 5 Hz), 122.6, 117.5, 112.6, 112.3, 108.1, 33.3, 23.8, 22.9.

LC-MS: 327.2 (M+H).

Anal. Calculated for C<sub>18</sub>H<sub>16</sub>F<sub>2</sub>N<sub>4</sub>: C, 66.25; H, 4.94; N, 17.17; Found: C, 65.99; H, 4.58; N, 17.14%.

## References

- (1) G. R. Fulmer, A. J. M. Miller, N. H. Sherden, H. E. Gottlieb, A. Nudelman, B. M. Stoltz, J. E. Bercaw and K. I. Goldberg, *Organometallics*, 2010, **29**, 2176-2179.
- (2) E. K. Reddy, C. Remya, K. Mantosh, A. M. Sajith, R. V. Omkumar, C. Sadasivan and S. Anwar, *Eur. J. Med. Chem.*, 2017, **139**, 367-377.



<sup>13</sup>C NMR of Compound 3

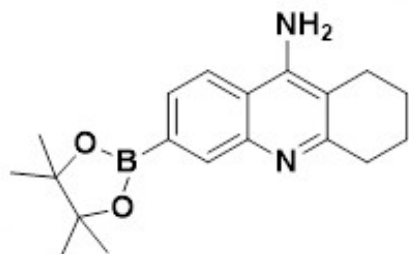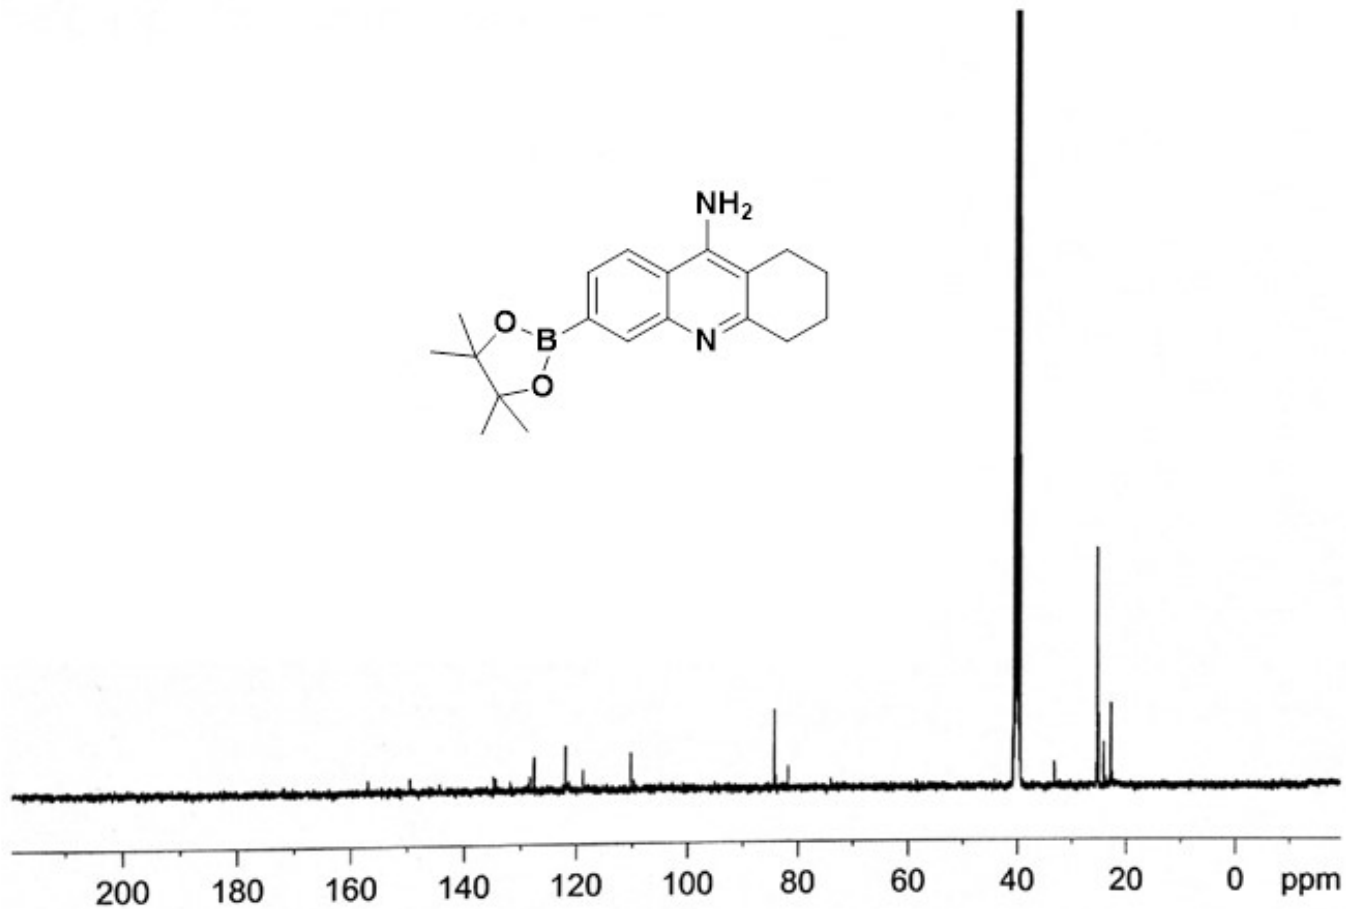

Current Data Parameters  
EXPNO 2  
PROCNO 1  
F2 - Acquisition Parameters  
INSTRUM spect  
PROBHD 5 mm PABBO BB-  
PULPROG zgpg30  
TD 32768  
SOLVENT DMSO  
NS 2200  
DS 4  
SWH 24038.461 Hz  
FIDRES 0.733596 Hz  
AQ 0.6815744 sec  
RG 2050  
DW 20.800 usec  
DE 6.50 usec  
TE 300.0 K  
D1 2.00000000 sec  
D11 0.03000000 sec  
TD0 1

----- CHANNEL f1 -----  
SFO1 100.6680949 MHz  
NUC1 13C  
P1 8.25 usec  
PLW1 58.00000000 W

----- CHANNEL f2 -----  
SFO2 400.3116012 MHz  
NUC2 1H  
CPDPRG[2] waltz16  
PCPD2 80.00 usec  
PLW2 16.00000000 W  
PLW12 0.52563000 W  
PLW13 0.20890000 W

F2 - Processing parameters  
SI 32768  
SF 100.6580296 MHz  
WDW EM  
SSB 0  
LB 1.00 Hz  
GB 0  
PC 1.40

<sup>1</sup>H NMR of Compound 7a

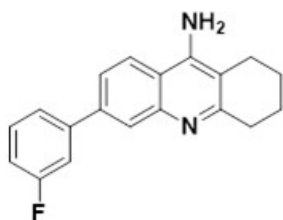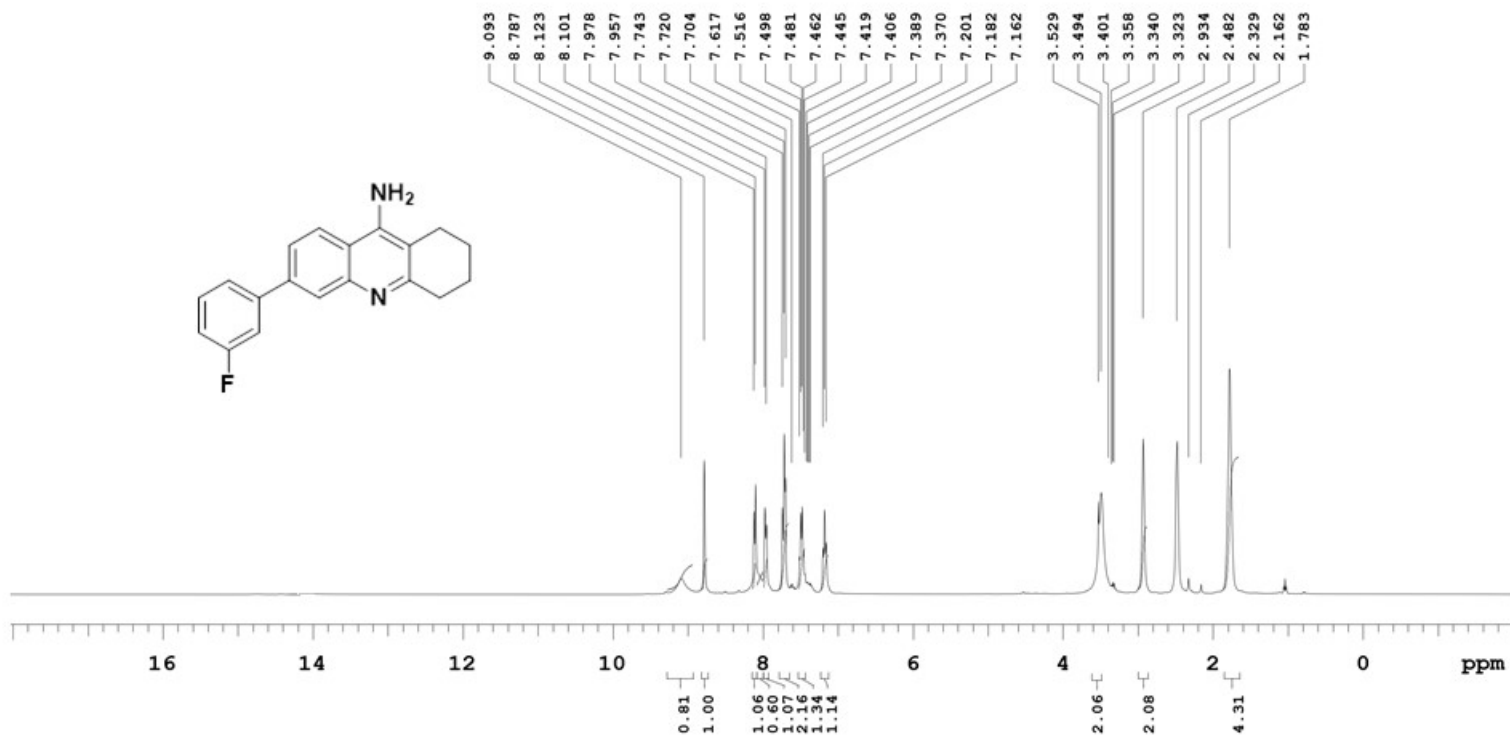

|                                                                                                                                   |                                |                                                                                          |                                                                                                      |
|-----------------------------------------------------------------------------------------------------------------------------------|--------------------------------|------------------------------------------------------------------------------------------|------------------------------------------------------------------------------------------------------|
| <b>PULSE SEQUENCE</b><br>Relax. delay 1.000 sec<br>Pulse 45.0 degrees<br>Acq. time 4.089 sec<br>Width 8012.8 Hz<br>16 repetitions | <b>OBSERVE</b> H1, 399.8231846 | <b>DATA PROCESSING</b><br>Line broadening 1.0 Hz<br>FT size 65536<br>Total time 1 minute | Solvent: dmsc<br>Ambient temperature<br>Operator: vnmr1<br>File: TAD-1-1H<br>VNMR5-400 "Agilent-NMR" |
|-----------------------------------------------------------------------------------------------------------------------------------|--------------------------------|------------------------------------------------------------------------------------------|------------------------------------------------------------------------------------------------------|

<sup>13</sup>C NMR of Compound 7a

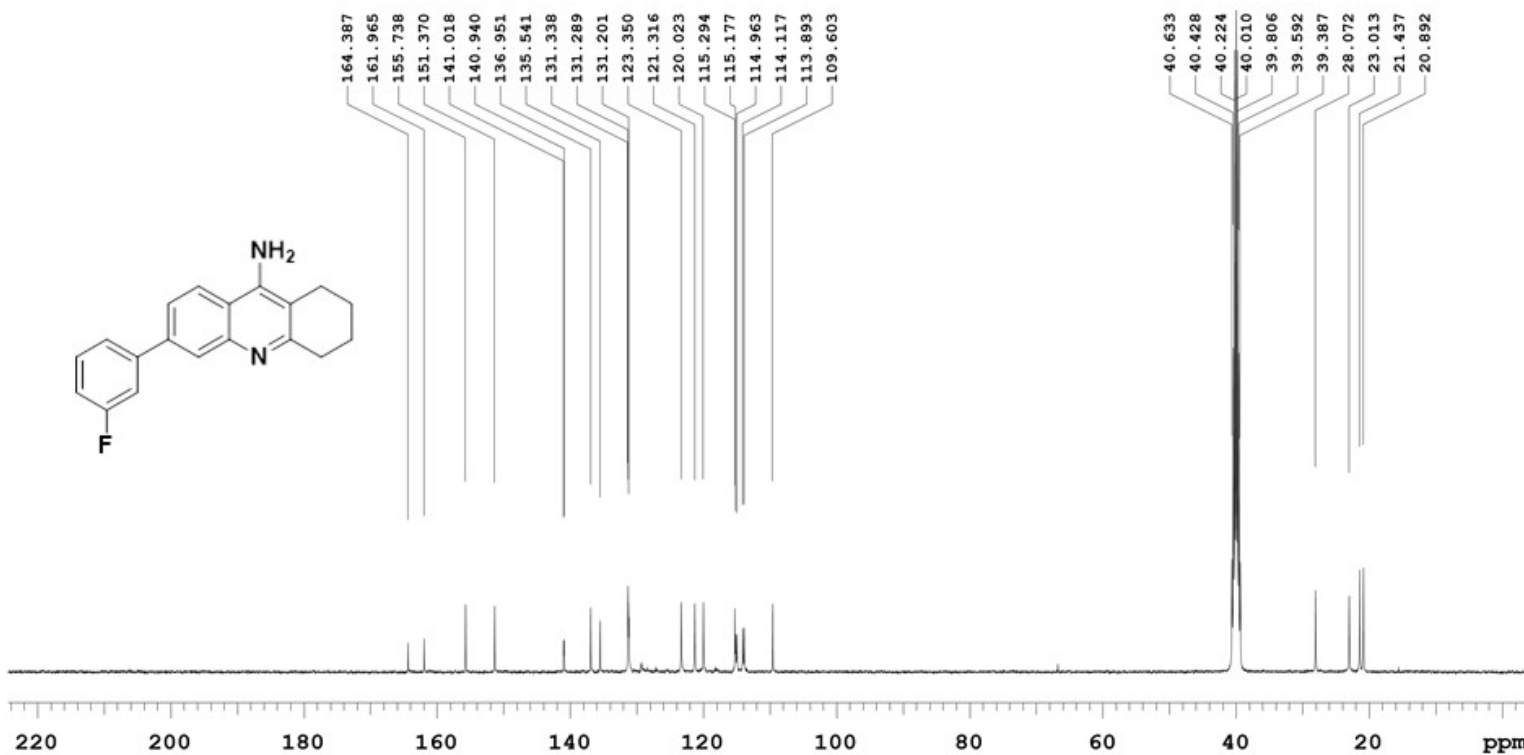

|                                                                                                                                      |                                                                                                                            |                                                                                            |                                                                                                       |
|--------------------------------------------------------------------------------------------------------------------------------------|----------------------------------------------------------------------------------------------------------------------------|--------------------------------------------------------------------------------------------|-------------------------------------------------------------------------------------------------------|
| <b>PULSE SEQUENCE</b><br>Relax. delay 1.000 sec<br>Pulse 45.0 degrees<br>Acq. time 1.022 sec<br>Width 32051.3 Hz<br>2048 repetitions | <b>OBSERVE</b> C13, 100.5356212<br><b>DECOUPLE</b> H1, 399.8251894<br>Power 39 dB<br>continuously on<br>WALTZ-16 modulated | <b>DATA PROCESSING</b><br>Line broadening 2.5 Hz<br>FT size 65536<br>Total time 69 minutes | Solvent: dmsd<br>Ambient temperature<br>Operator: vnmr1<br>File: TAD-1-13C<br>VNMRS-400 "Agilent-NMR" |
|--------------------------------------------------------------------------------------------------------------------------------------|----------------------------------------------------------------------------------------------------------------------------|--------------------------------------------------------------------------------------------|-------------------------------------------------------------------------------------------------------|



<sup>1</sup>H NMR of Compound **7b**

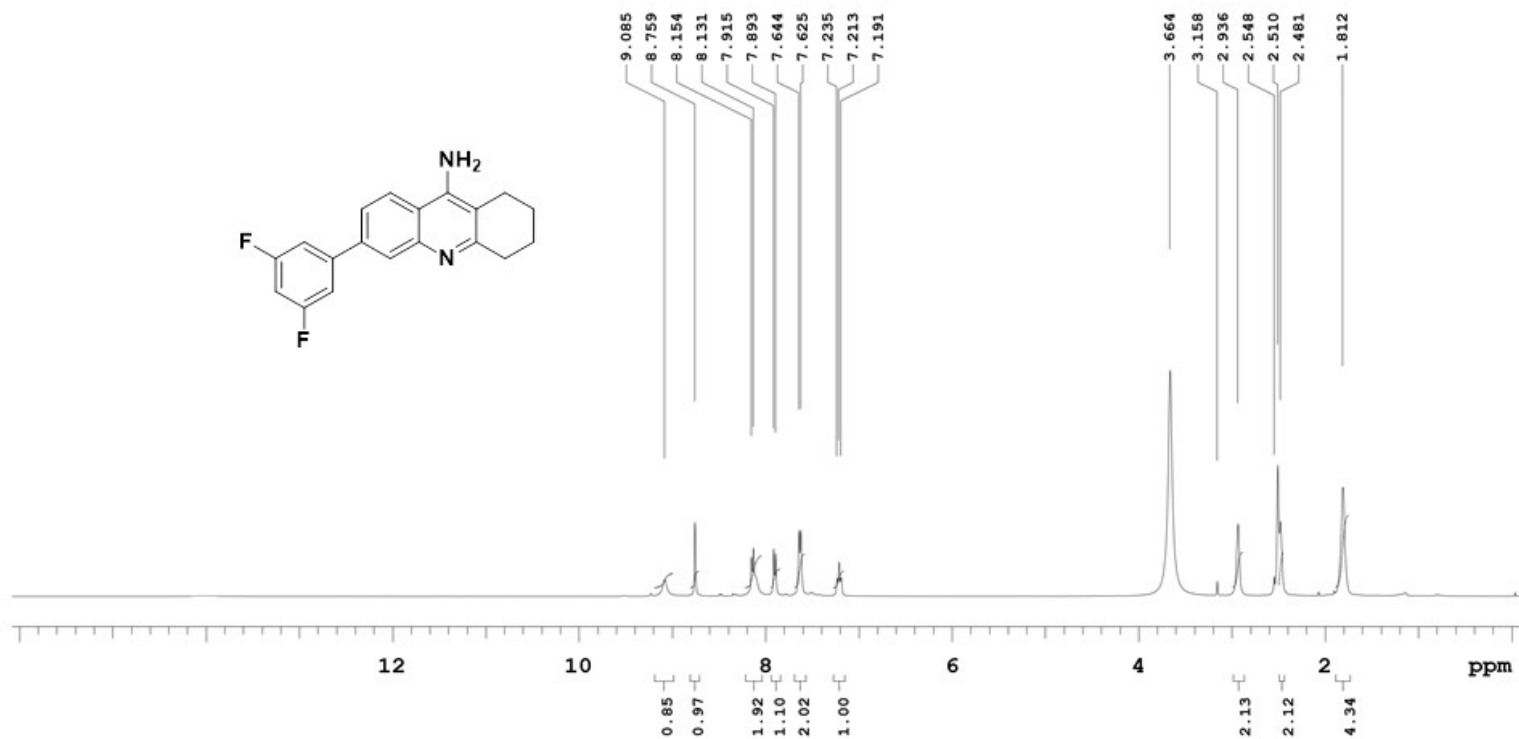

|                                                                                                                                                       |                                |                                                                                                      |                                                                                                                             |
|-------------------------------------------------------------------------------------------------------------------------------------------------------|--------------------------------|------------------------------------------------------------------------------------------------------|-----------------------------------------------------------------------------------------------------------------------------|
| <p>PULSE SEQUENCE</p> <p>Relax. delay 2.000 sec</p> <p>Pulse 45.0 degrees</p> <p>Acq. time 3.408 sec</p> <p>Width 9615.4 Hz</p> <p>16 repetitions</p> | <p>OBSERVE H1, 399.8231781</p> | <p>DATA PROCESSING</p> <p>Line broadening 0.5 Hz</p> <p>FT size 65536</p> <p>Total time 1 minute</p> | <p>Solvent: dms0</p> <p>Ambient temperature</p> <p>Operator: vnmr1</p> <p>File: TAD-2-1H</p> <p>VNMRS-400 "Agilent-NMR"</p> |
|-------------------------------------------------------------------------------------------------------------------------------------------------------|--------------------------------|------------------------------------------------------------------------------------------------------|-----------------------------------------------------------------------------------------------------------------------------|

<sup>13</sup>C NMR of Compound 7b

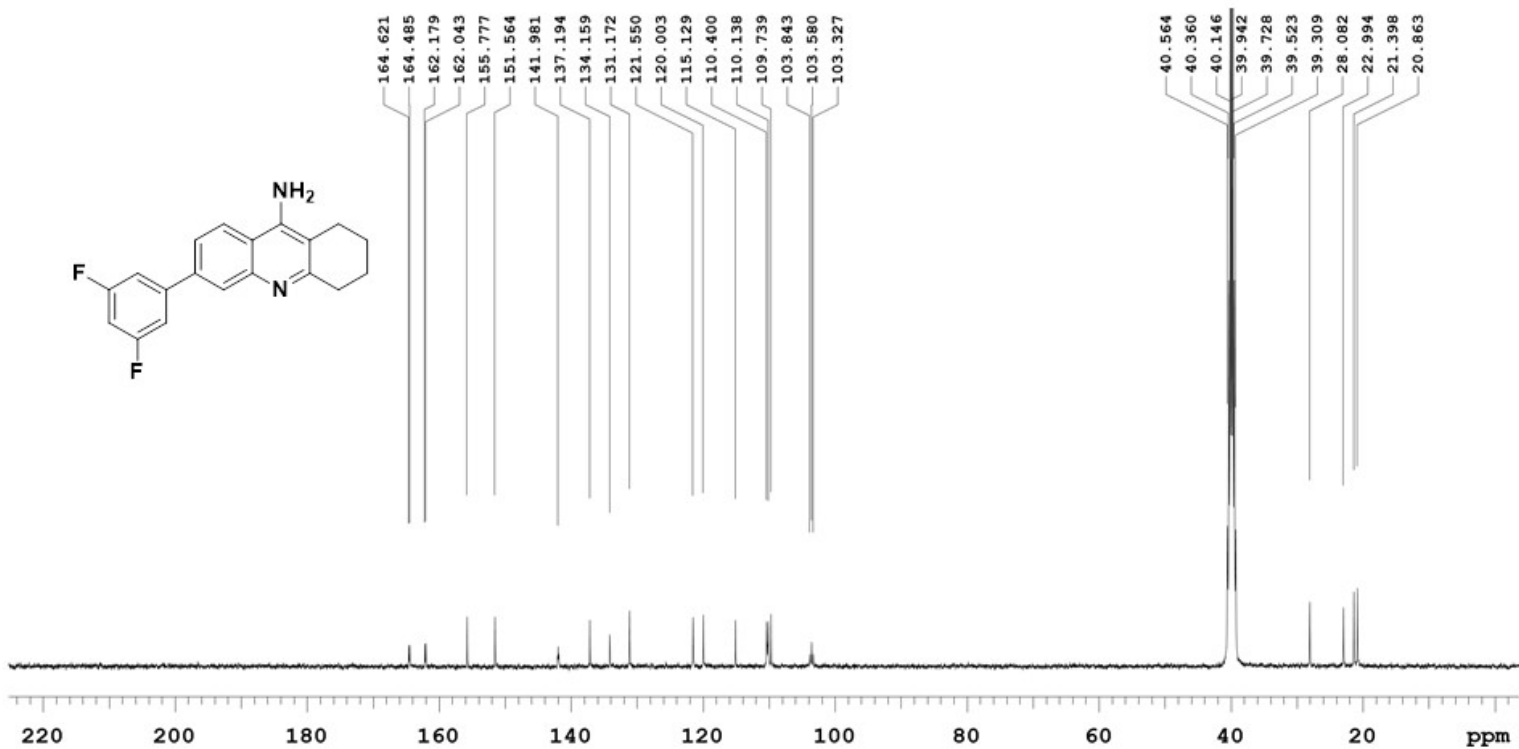

|                                                                                                                                                                                                                                      |                                                                                                                                                                                           |                                                                                                                                                         |                                                                                                                                                                                      |
|--------------------------------------------------------------------------------------------------------------------------------------------------------------------------------------------------------------------------------------|-------------------------------------------------------------------------------------------------------------------------------------------------------------------------------------------|---------------------------------------------------------------------------------------------------------------------------------------------------------|--------------------------------------------------------------------------------------------------------------------------------------------------------------------------------------|
| <p><b>PULSE SEQUENCE</b><br/>                 Relax. delay 1.000 sec<br/>                 Pulse 45.0 degrees<br/>                 Acq. time 1.022 sec<br/>                 Width 32051.3 Hz<br/>                 712 repetitions</p> | <p><b>OBSERVE</b> C13, 100.5356212<br/> <b>DECOUPLE</b> H1, 399.8251894<br/>                 Power 39 dB<br/>                 continuously on<br/>                 WALTZ-16 modulated</p> | <p><b>DATA PROCESSING</b><br/>                 Line broadening 2.5 Hz<br/>                 FT size 65536<br/>                 Total time 24 minutes</p> | <p>Solvent: dmsd<br/>                 Ambient temperature<br/>                 Operator: vnmr1<br/>                 File: TAD-2-13C<br/>                 VNMR5-400 "Agilent-NMR"</p> |
|--------------------------------------------------------------------------------------------------------------------------------------------------------------------------------------------------------------------------------------|-------------------------------------------------------------------------------------------------------------------------------------------------------------------------------------------|---------------------------------------------------------------------------------------------------------------------------------------------------------|--------------------------------------------------------------------------------------------------------------------------------------------------------------------------------------|

<sup>1</sup>H NMR of Compound 7c

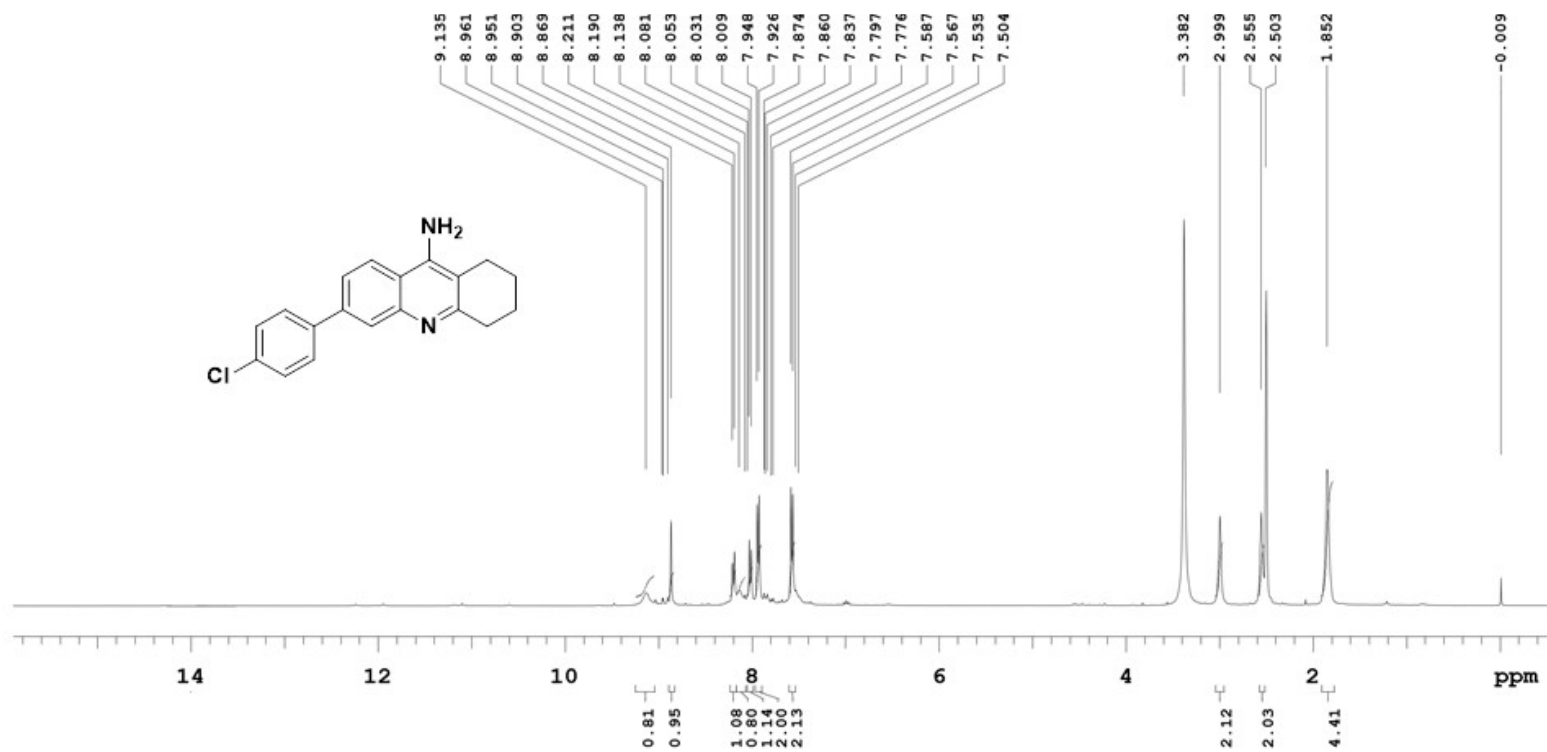

|                                                                                                                                                                                           |                                |                                                                                                                               |                                                                                                                                                     |
|-------------------------------------------------------------------------------------------------------------------------------------------------------------------------------------------|--------------------------------|-------------------------------------------------------------------------------------------------------------------------------|-----------------------------------------------------------------------------------------------------------------------------------------------------|
| <p><b>PULSE SEQUENCE</b><br/>         Relax. delay 2.000 sec<br/>         Pulse 45.0 degrees<br/>         Acq. time 3.408 sec<br/>         Width 9615.4 Hz<br/>         8 repetitions</p> | <p>OBSERVE H1, 399.8231813</p> | <p><b>DATA PROCESSING</b><br/>         Line broadening 1.0 Hz<br/>         FT size 65536<br/>         Total time 1 minute</p> | <p>Solvent: dmsd<br/>         Ambient temperature<br/>         Operator: vnmr1<br/>         File: TAD-3-1H<br/>         VNMR5-400 "Agilent-NMR"</p> |
|-------------------------------------------------------------------------------------------------------------------------------------------------------------------------------------------|--------------------------------|-------------------------------------------------------------------------------------------------------------------------------|-----------------------------------------------------------------------------------------------------------------------------------------------------|

<sup>13</sup>C NMR of Compound 7c

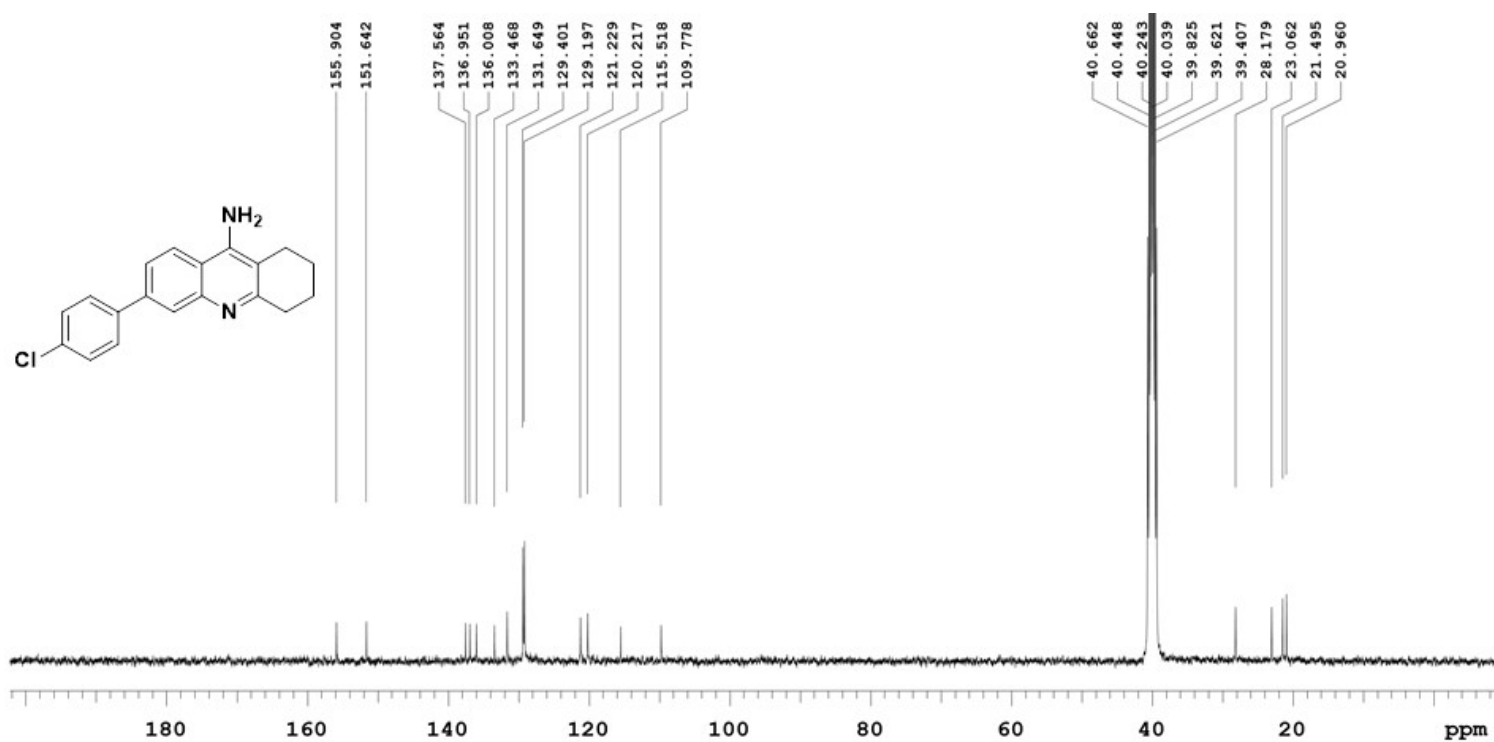

|                                                                                                                                                                                                                                       |                                                                                                                                                                                           |                                                                                                                                                         |                                                                                                                                                                                      |
|---------------------------------------------------------------------------------------------------------------------------------------------------------------------------------------------------------------------------------------|-------------------------------------------------------------------------------------------------------------------------------------------------------------------------------------------|---------------------------------------------------------------------------------------------------------------------------------------------------------|--------------------------------------------------------------------------------------------------------------------------------------------------------------------------------------|
| <p><b>PULSE SEQUENCE</b><br/>                 Relax. delay 1.000 sec<br/>                 Pulse 45.0 degrees<br/>                 Acq. time 1.022 sec<br/>                 Width 32051.3 Hz<br/>                 2048 repetitions</p> | <p><b>OBSERVE</b> C13, 100.5356212<br/> <b>DECOUPLE</b> H1, 399.8251894<br/>                 Power 39 dB<br/>                 continuously on<br/>                 WALTZ-16 modulated</p> | <p><b>DATA PROCESSING</b><br/>                 Line broadening 2.5 Hz<br/>                 FT size 65536<br/>                 Total time 69 minutes</p> | <p>Solvent: dms0<br/>                 Ambient temperature<br/>                 Operator: vnmr1<br/>                 File: TAD-3-13C<br/>                 VNMRS-400 "Agilent-NMR"</p> |
|---------------------------------------------------------------------------------------------------------------------------------------------------------------------------------------------------------------------------------------|-------------------------------------------------------------------------------------------------------------------------------------------------------------------------------------------|---------------------------------------------------------------------------------------------------------------------------------------------------------|--------------------------------------------------------------------------------------------------------------------------------------------------------------------------------------|

<sup>1</sup>H NMR of Compound 7d

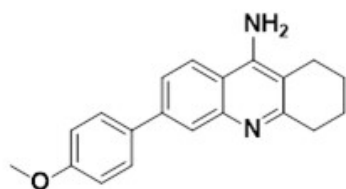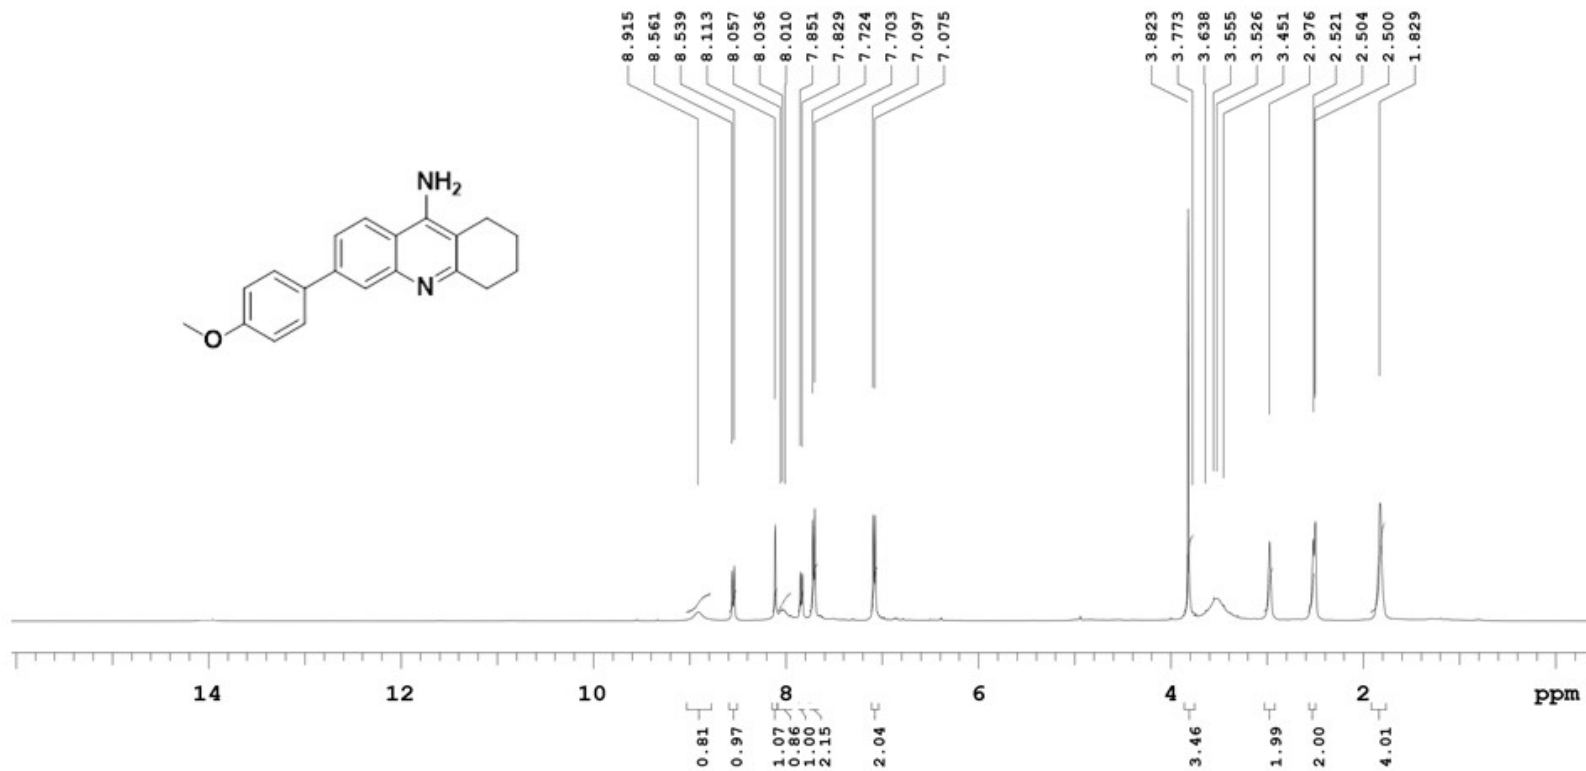

|                                                                                                                                   |                                |                                                                                          |                                                                                                      |
|-----------------------------------------------------------------------------------------------------------------------------------|--------------------------------|------------------------------------------------------------------------------------------|------------------------------------------------------------------------------------------------------|
| <b>PULSE SEQUENCE</b><br>Relax. delay 2.000 sec<br>Pulse 45.0 degrees<br>Acq. time 3.408 sec<br>Width 9615.4 Hz<br>16 repetitions | <b>OBSERVE</b> H1, 399.8231829 | <b>DATA PROCESSING</b><br>Line broadening 0.5 Hz<br>FT size 65536<br>Total time 1 minute | Solvent: dms0<br>Ambient temperature<br>Operator: vnmr1<br>File: TAD-4-1H<br>VNMR5-400 "Agilent-NMR" |
|-----------------------------------------------------------------------------------------------------------------------------------|--------------------------------|------------------------------------------------------------------------------------------|------------------------------------------------------------------------------------------------------|

<sup>13</sup>C NMR of Compound 7d

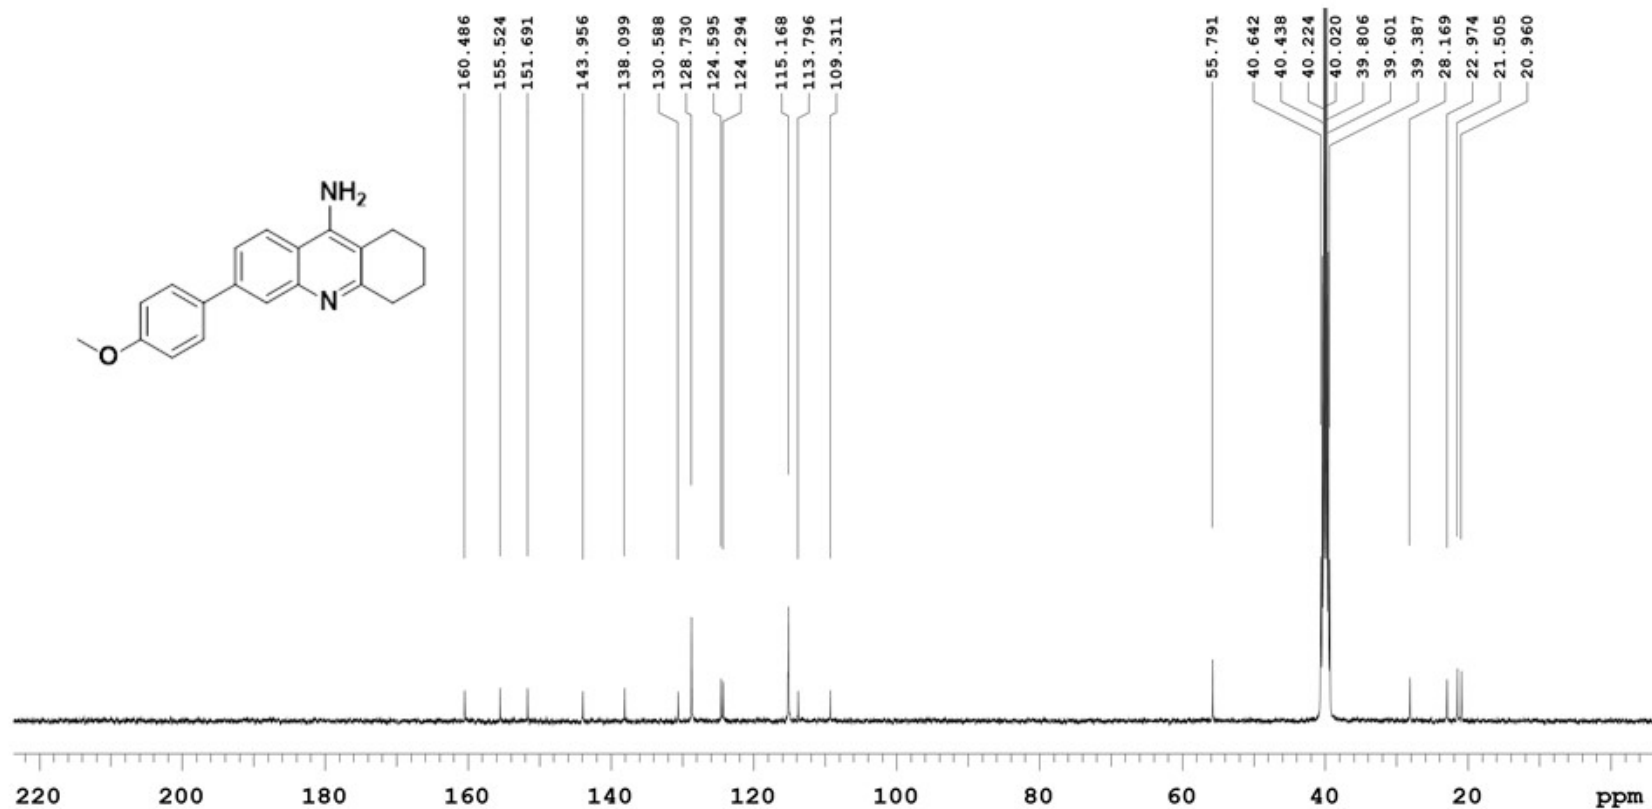

PULSE SEQUENCE

Relax. delay 1.000 sec  
Pulse 45.0 degrees  
Acq. time 1.022 sec  
Width 32051.3 Hz  
1024 repetitions

OBSERVE C13, 100.5356212

DECOUPLE H1, 399.8251894  
Power 39 dB  
continuously on  
WALTZ-16 modulated

DATA PROCESSING

Line broadening 2.5 Hz  
FT size 65536  
Total time 34 minutes

Solvent: dmsd  
Ambient temperature  
Operator: vnmr1  
File: TAD-4-13C  
VNMR-400 "Agilent-NMR"

<sup>1</sup>H NMR of Compound 7e

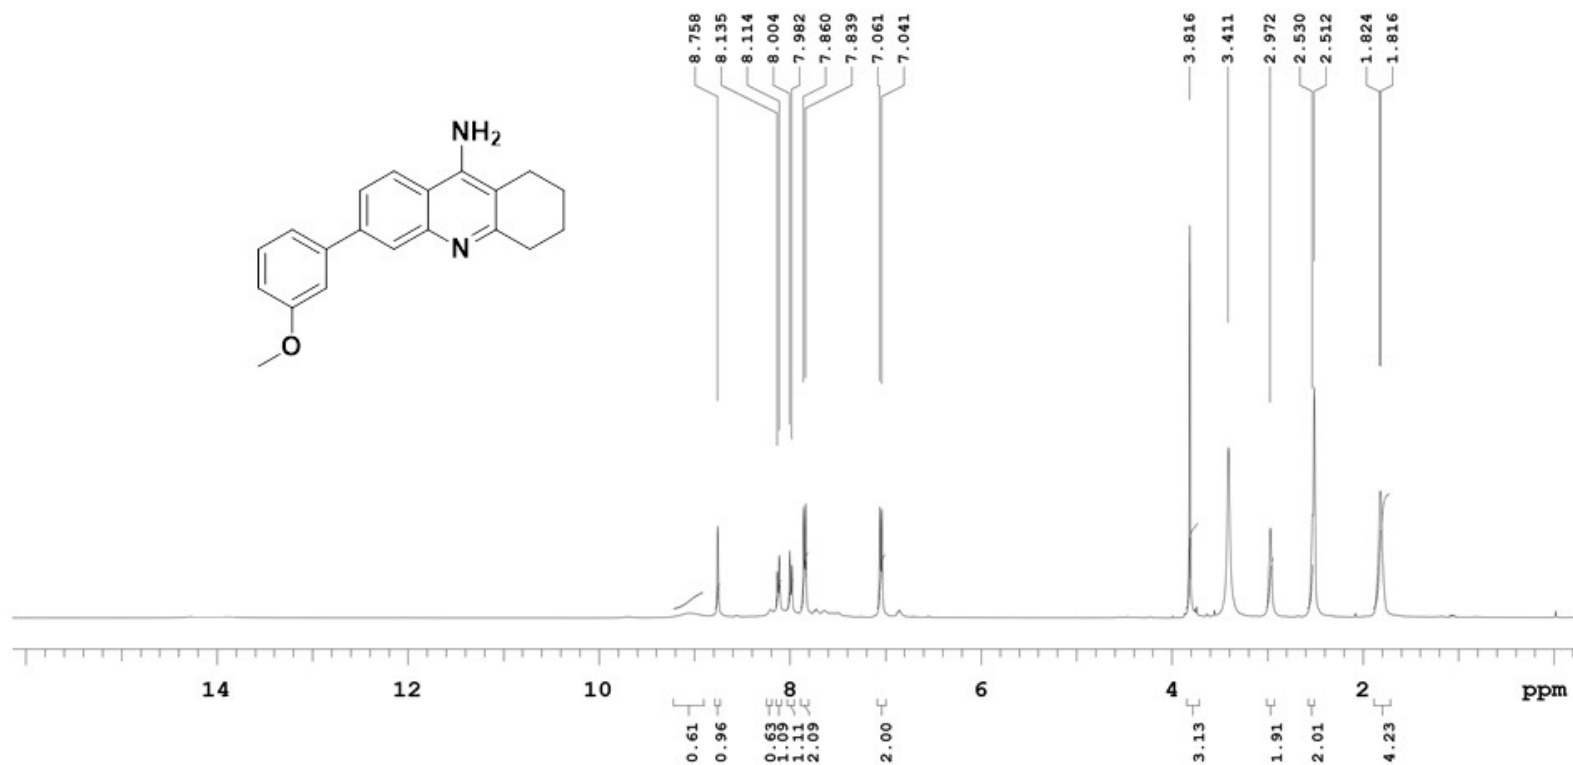

|                                                                                                                                   |                                |                                                                                          |                                                                                                       |
|-----------------------------------------------------------------------------------------------------------------------------------|--------------------------------|------------------------------------------------------------------------------------------|-------------------------------------------------------------------------------------------------------|
| <b>PULSE SEQUENCE</b><br>Relax. delay 2.000 sec<br>Pulse 45.0 degrees<br>Acq. time 3.408 sec<br>Width 9615.4 Hz<br>16 repetitions | <b>OBSERVE</b> H1, 399.8231781 | <b>DATA PROCESSING</b><br>Line broadening 0.5 Hz<br>FT size 65536<br>Total time 1 minute | Solvent: dmso<br>Ambient temperature<br>Operator: vnmr1<br>File: TAD-05-1H<br>VNMR5-400 "Agilent-NMR" |
|-----------------------------------------------------------------------------------------------------------------------------------|--------------------------------|------------------------------------------------------------------------------------------|-------------------------------------------------------------------------------------------------------|

<sup>13</sup>C NMR of Compound 7e

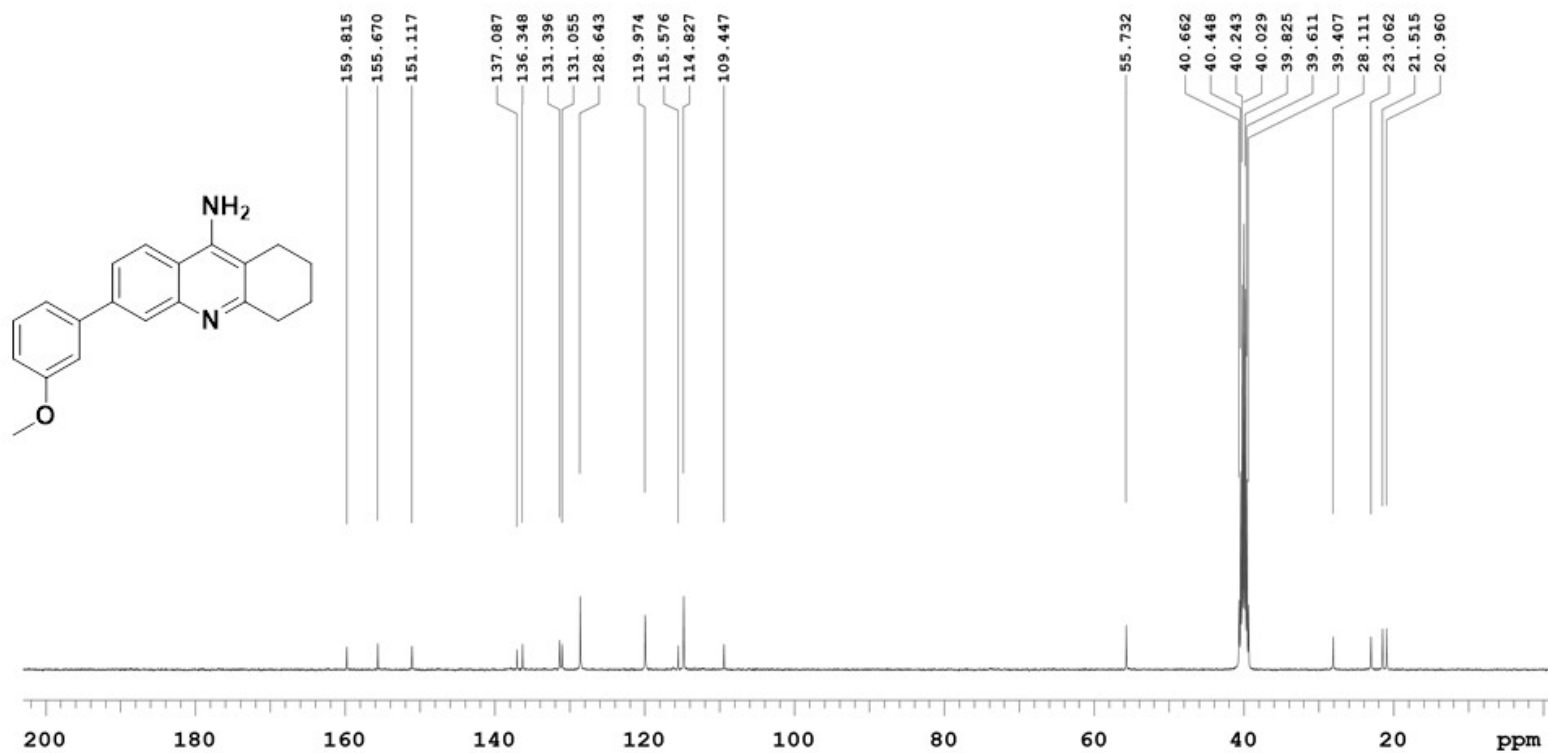

|                                                                                                                                      |                                                                                                                            |                                                                                            |                                                                                                        |
|--------------------------------------------------------------------------------------------------------------------------------------|----------------------------------------------------------------------------------------------------------------------------|--------------------------------------------------------------------------------------------|--------------------------------------------------------------------------------------------------------|
| <b>PULSE SEQUENCE</b><br>Relax. delay 1.000 sec<br>Pulse 45.0 degrees<br>Acq. time 1.022 sec<br>Width 32051.3 Hz<br>2048 repetitions | <b>OBSERVE</b> C13, 100.5356212<br><b>DECOUPLE</b> H1, 399.8251894<br>Power 39 dB<br>continuously on<br>WALTZ-16 modulated | <b>DATA PROCESSING</b><br>Line broadening 2.5 Hz<br>FT size 65536<br>Total time 69 minutes | Solvent: dmsd<br>Ambient temperature<br>Operator: vnmr1<br>File: TAD-05-13C<br>VNMRS-400 "Agilent-NMR" |
|--------------------------------------------------------------------------------------------------------------------------------------|----------------------------------------------------------------------------------------------------------------------------|--------------------------------------------------------------------------------------------|--------------------------------------------------------------------------------------------------------|



<sup>1</sup>H NMR of Compound 7f

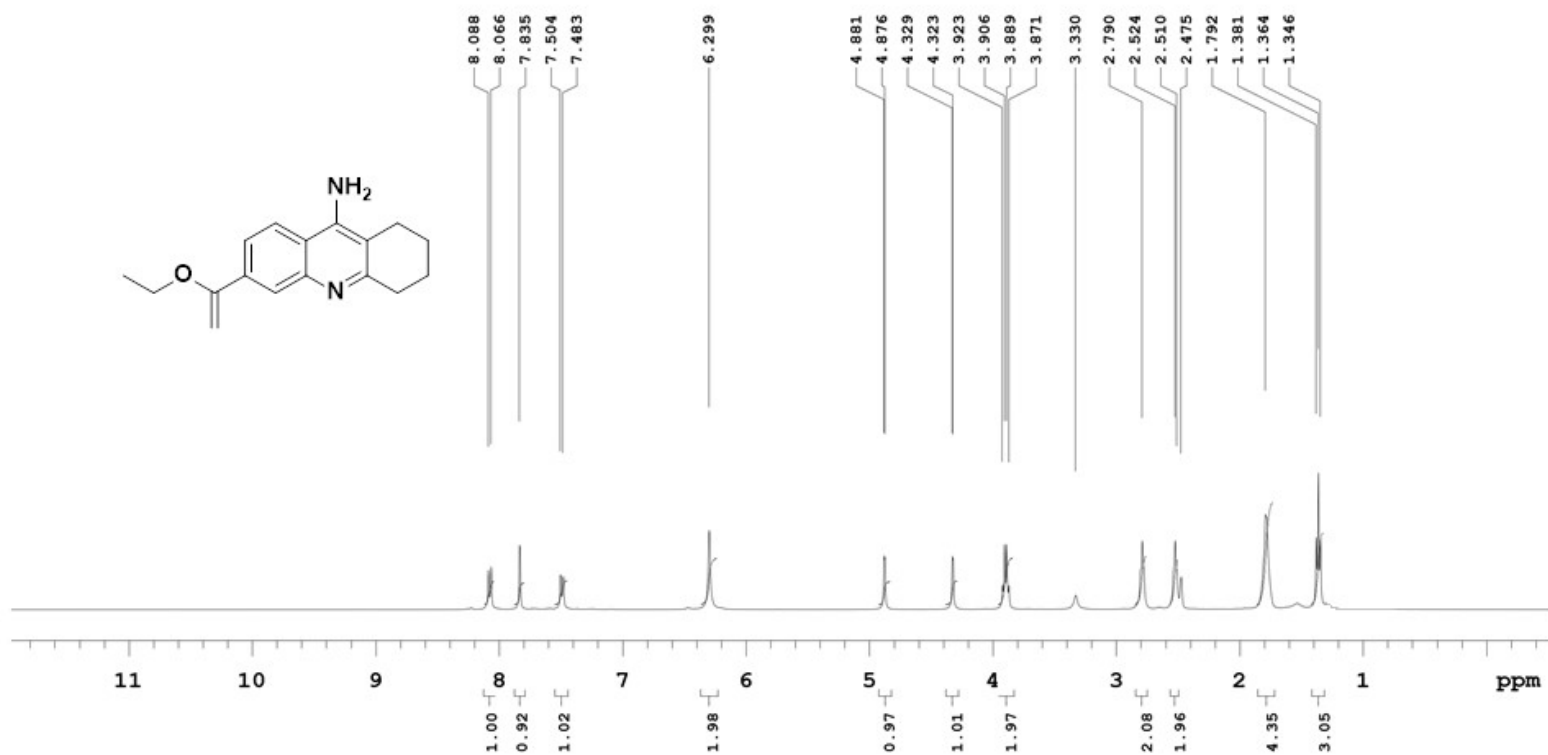

|                                                                                                                                   |                                |                                                                                          |                                                                                                       |
|-----------------------------------------------------------------------------------------------------------------------------------|--------------------------------|------------------------------------------------------------------------------------------|-------------------------------------------------------------------------------------------------------|
| <b>PULSE SEQUENCE</b><br>Relax. delay 1.000 sec<br>Pulse 45.0 degrees<br>Acq. time 3.146 sec<br>Width 10416.7 Hz<br>8 repetitions | <b>OBSERVE</b> H1, 399.8231903 | <b>DATA PROCESSING</b><br>Line broadening 1.0 Hz<br>FT size 65536<br>Total time 1 minute | Solvent: dmsd<br>Ambient temperature<br>Operator: vnmr1<br>File: TAD-57-1H<br>VNMR5-400 "Agilent-NMR" |
|-----------------------------------------------------------------------------------------------------------------------------------|--------------------------------|------------------------------------------------------------------------------------------|-------------------------------------------------------------------------------------------------------|

<sup>13</sup>C NMR of Compound 7f

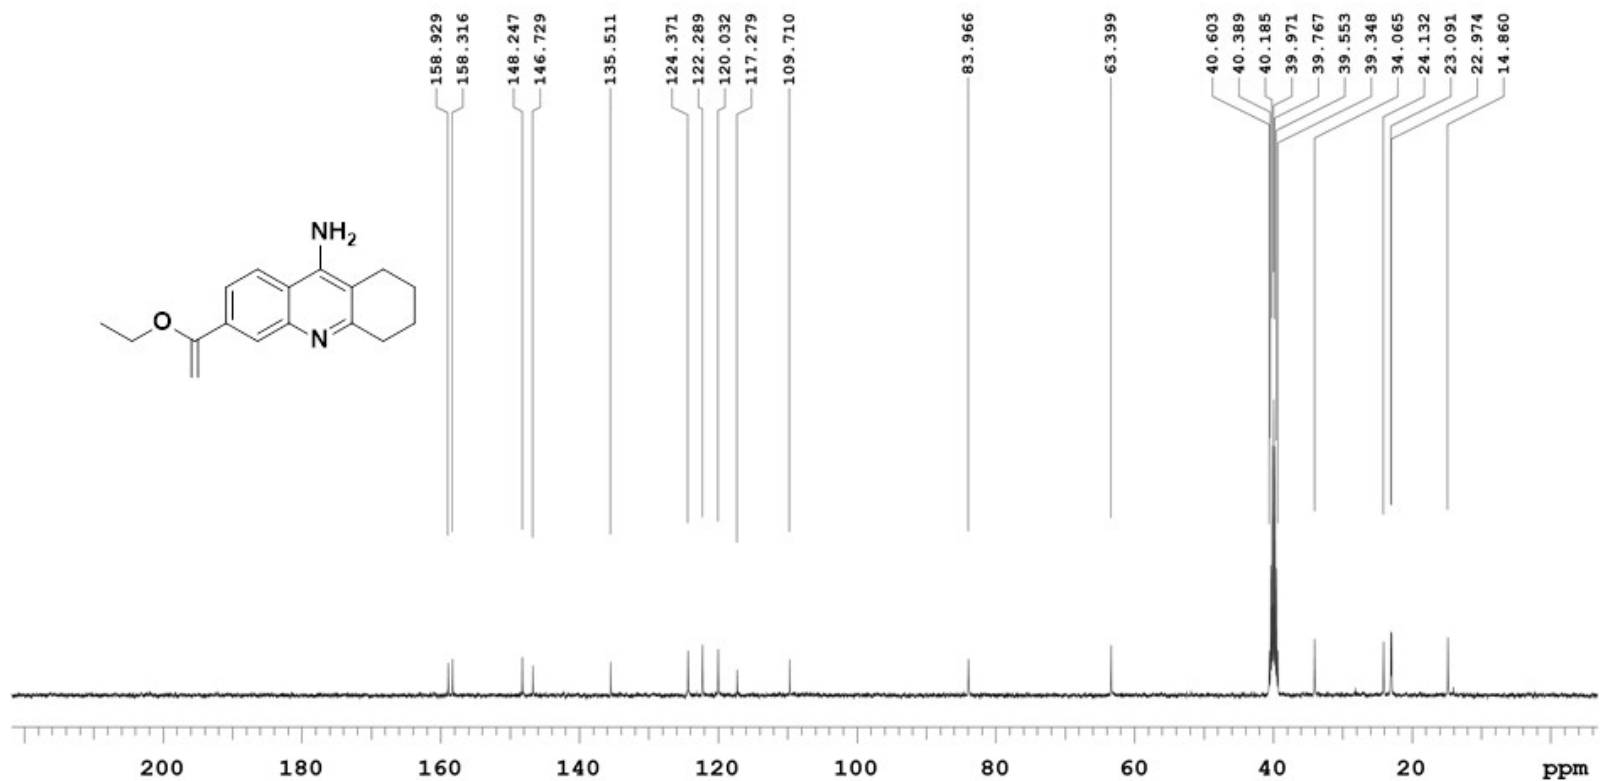

|                                                                                                                                                                                                                                      |                                                                                                                                                                                           |                                                                                                                                                         |                                                                                                                                                                                       |
|--------------------------------------------------------------------------------------------------------------------------------------------------------------------------------------------------------------------------------------|-------------------------------------------------------------------------------------------------------------------------------------------------------------------------------------------|---------------------------------------------------------------------------------------------------------------------------------------------------------|---------------------------------------------------------------------------------------------------------------------------------------------------------------------------------------|
| <p><b>PULSE SEQUENCE</b><br/>                 Relax. delay 1.000 sec<br/>                 Pulse 45.0 degrees<br/>                 Acq. time 1.022 sec<br/>                 Width 32051.3 Hz<br/>                 334 repetitions</p> | <p><b>OBSERVE</b> C13, 100.5356212<br/> <b>DECOUPLE</b> H1, 399.8251894<br/>                 Power 39 dB<br/>                 continuously on<br/>                 WALTZ-16 modulated</p> | <p><b>DATA PROCESSING</b><br/>                 Line broadening 2.5 Hz<br/>                 FT size 65536<br/>                 Total time 11 minutes</p> | <p>Solvent: dmsd<br/>                 Ambient temperature<br/>                 Operator: vnmr1<br/>                 File: TAD-57-13C<br/>                 VNMRS-400 "Agilent-NMR"</p> |
|--------------------------------------------------------------------------------------------------------------------------------------------------------------------------------------------------------------------------------------|-------------------------------------------------------------------------------------------------------------------------------------------------------------------------------------------|---------------------------------------------------------------------------------------------------------------------------------------------------------|---------------------------------------------------------------------------------------------------------------------------------------------------------------------------------------|

<sup>1</sup>H NMR of Compound 7g

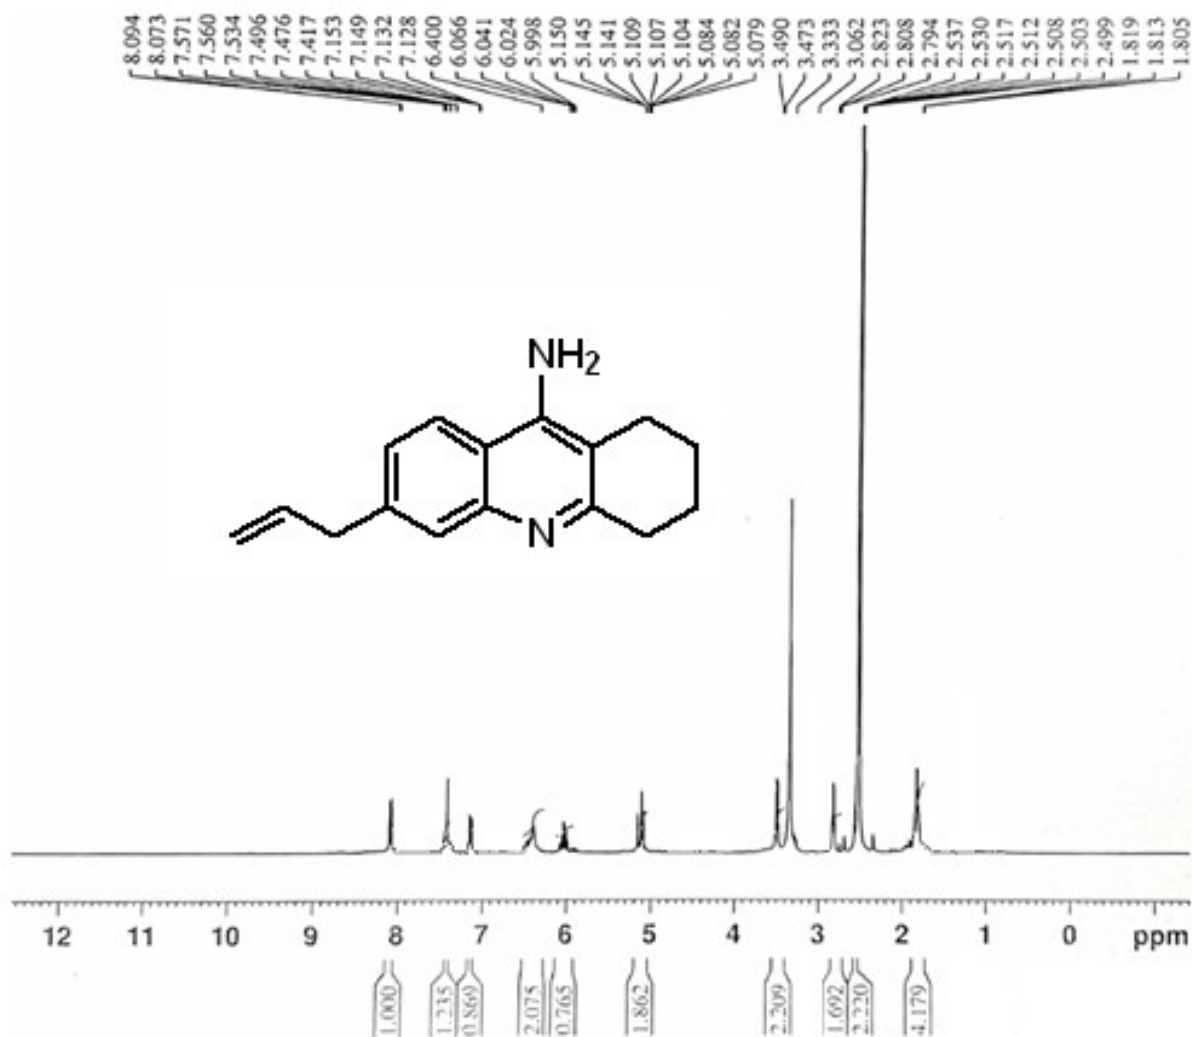

```

INSTRUM  AVNeo 400 Nanobay
PROBHD    Z163739_0178 (
PULPROG   zg30
TD         32768
SOLVENT    DMSO
NS         16
DS         2
SWH        8196.722 Hz
FIDRES     0.500288 Hz
AQ         1.9988480 sec
RG         101
DW         61.000 usec
DE         13.89 usec
TE         298.0 K
D1         2.00000000 sec
TDO        1
SFO1       400.5324733 MHz
NUC1       1H
PO         2.67 usec
P1         8.00 usec
PLW1       21.64200020 W

F2 - Processing parameters
SI         65536
SF         400.5300000 MHz
WDW        EM
SSB        0
LB         0.30 Hz
GB         0
PN         1.00
    
```

<sup>13</sup>C NMR of Compound 7g

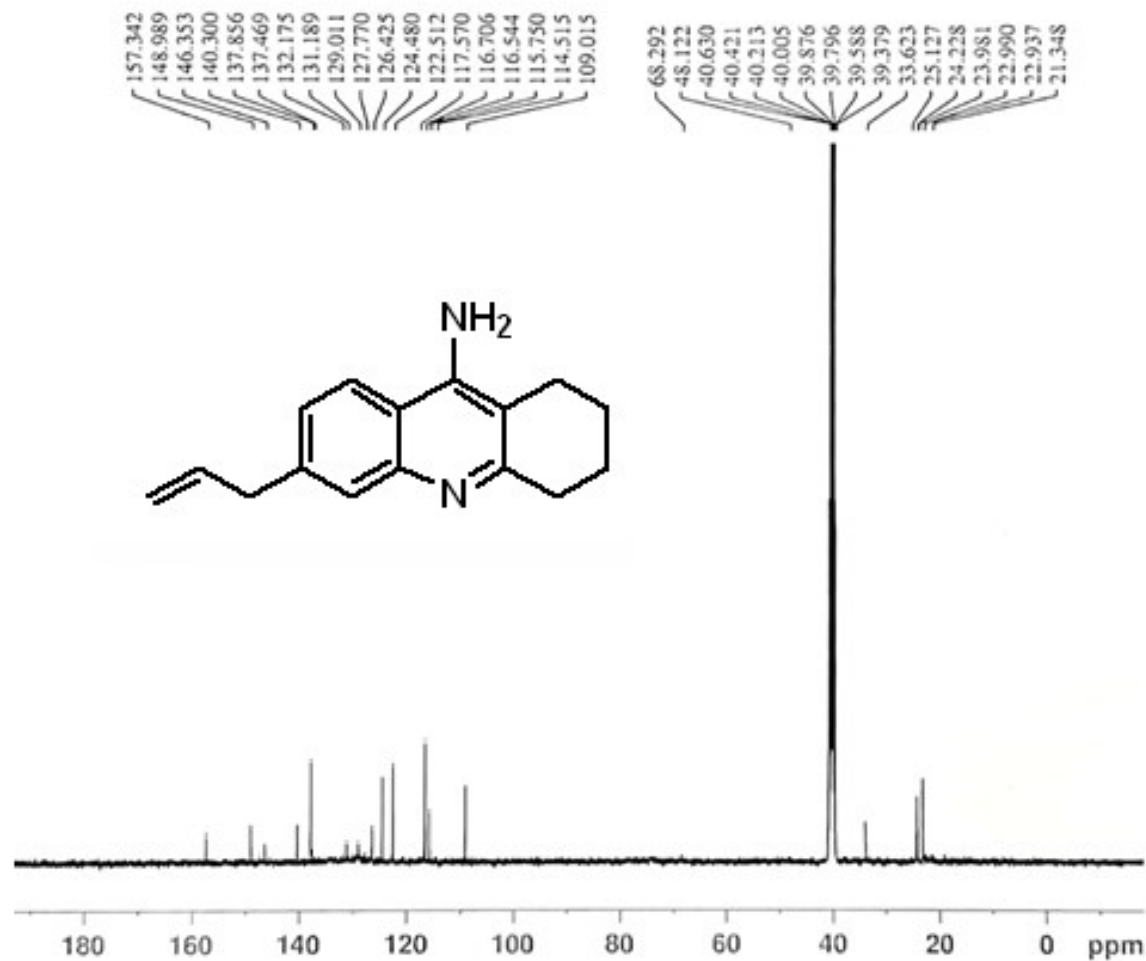

```

INSTRUM  AVNec 400 Nanobay
PROBHD    Z163739_0178 (
PULPROG   zgpg30
TD         32768
SOLVENT    DMSO
NS         1024
DS         4
SWH        23809.523 Hz
FIDRES     1.453218 Hz
AQ         0.6881280 sec
RG         101
DM         21.000 usec
DE         6.50 usec
TE         298.0 K
D1         2.00000000 sec
D11        0.03000000 sec
TD0        1
SFO1       100.7234199 MHz
NUC1       13C
PO         2.67 usec
P1         8.00 usec
PLW1       90.91000366 W
SFO2       400.5316021 MHz
NUC2       1H
CPDPRG[2]  waltz165
PCPD2      90.00 usec
PLW2       21.64200020 W
PLW12      0.17100000 W
PLW13      0.08587700 W

F2 - Processing parameters
SI         32768
SF         100.7133486 MHz
WDW        EM
SSB        0
LB         1.00 Hz
GB         0
PC         1.40
    
```

<sup>1</sup>H NMR of Compound 7h

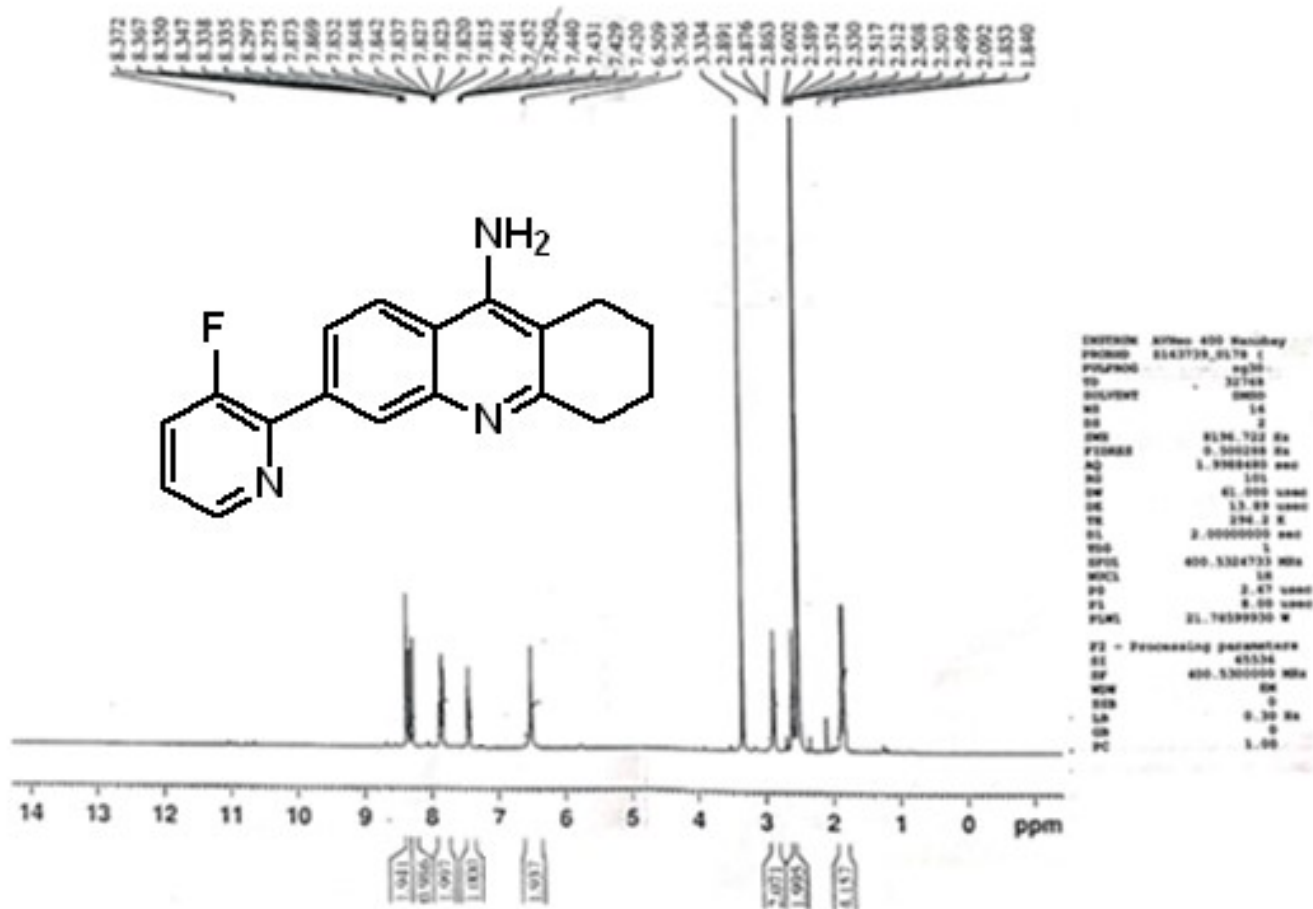

# <sup>13</sup>C NMR of Compound 7h

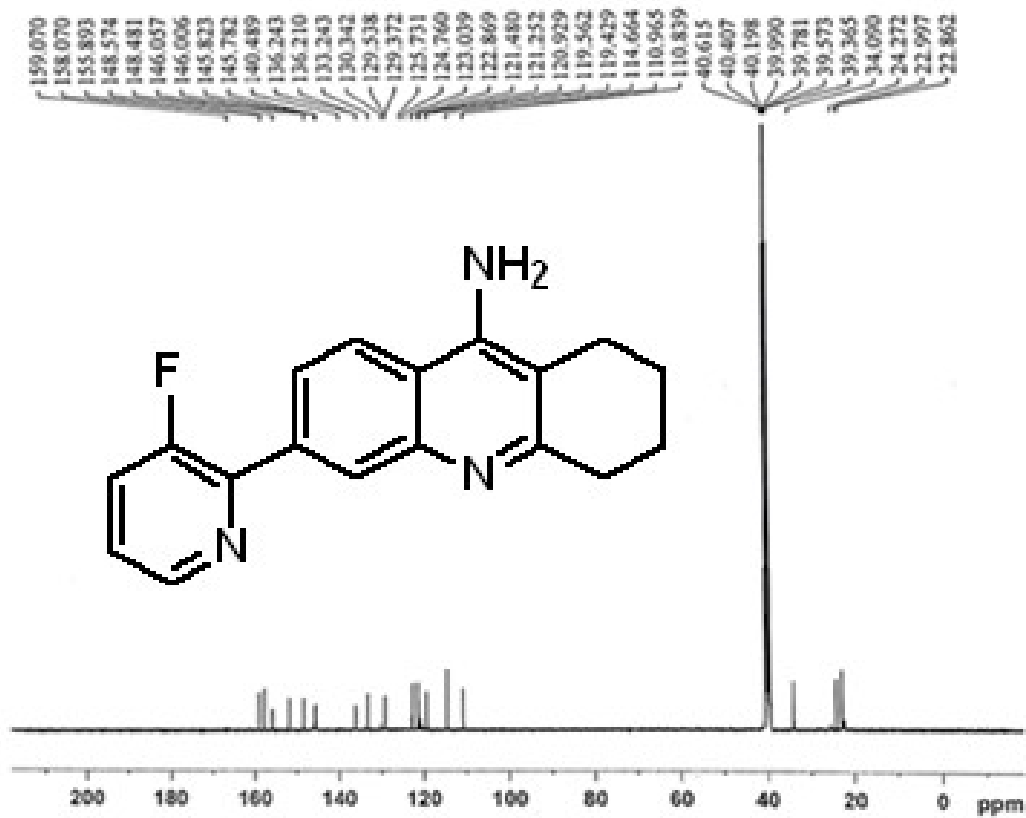

```
EXPNO1 400 MHz Bruker  
PROCNO 114213a_0110_1  
F2 - Processing parameters  
SI 32768  
SF 100.625000 MHz  
WDW EM  
SSB 0  
LB 1.00 Hz  
GB 0  
PC 1.40
```

<sup>1</sup>H NMR of Compound 9a

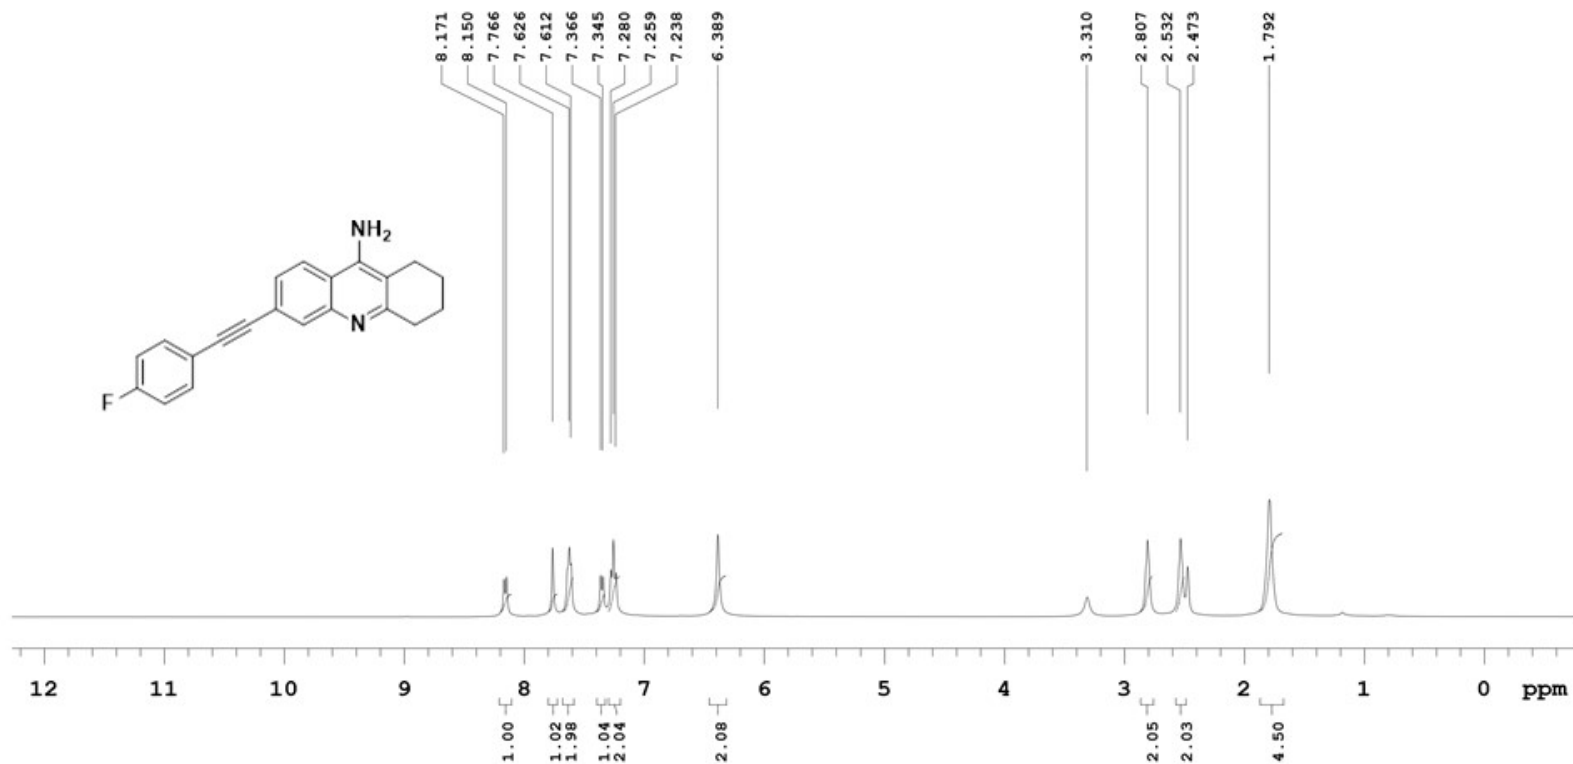

|                                                                                                                                                                                                                                    |                                |                                                                                                                                                       |                                                                                                                                                                                      |
|------------------------------------------------------------------------------------------------------------------------------------------------------------------------------------------------------------------------------------|--------------------------------|-------------------------------------------------------------------------------------------------------------------------------------------------------|--------------------------------------------------------------------------------------------------------------------------------------------------------------------------------------|
| <p><b>PULSE SEQUENCE</b><br/>                 Relax. delay 1.000 sec<br/>                 Pulse 45.0 degrees<br/>                 Acq. time 3.146 sec<br/>                 Width 10416.7 Hz<br/>                 8 repetitions</p> | <p>OBSERVE H1, 399.8231903</p> | <p><b>DATA PROCESSING</b><br/>                 Line broadening 1.0 Hz<br/>                 FT size 65536<br/>                 Total time 1 minute</p> | <p>Solvent: dmsc<br/>                 Ambient temperature<br/>                 Operator: vnmr1<br/>                 File: TAD-51-1H<br/>                 VNMRS-400 "Agilent-NMR"</p> |
|------------------------------------------------------------------------------------------------------------------------------------------------------------------------------------------------------------------------------------|--------------------------------|-------------------------------------------------------------------------------------------------------------------------------------------------------|--------------------------------------------------------------------------------------------------------------------------------------------------------------------------------------|

<sup>13</sup>C NMR of Compound 9a

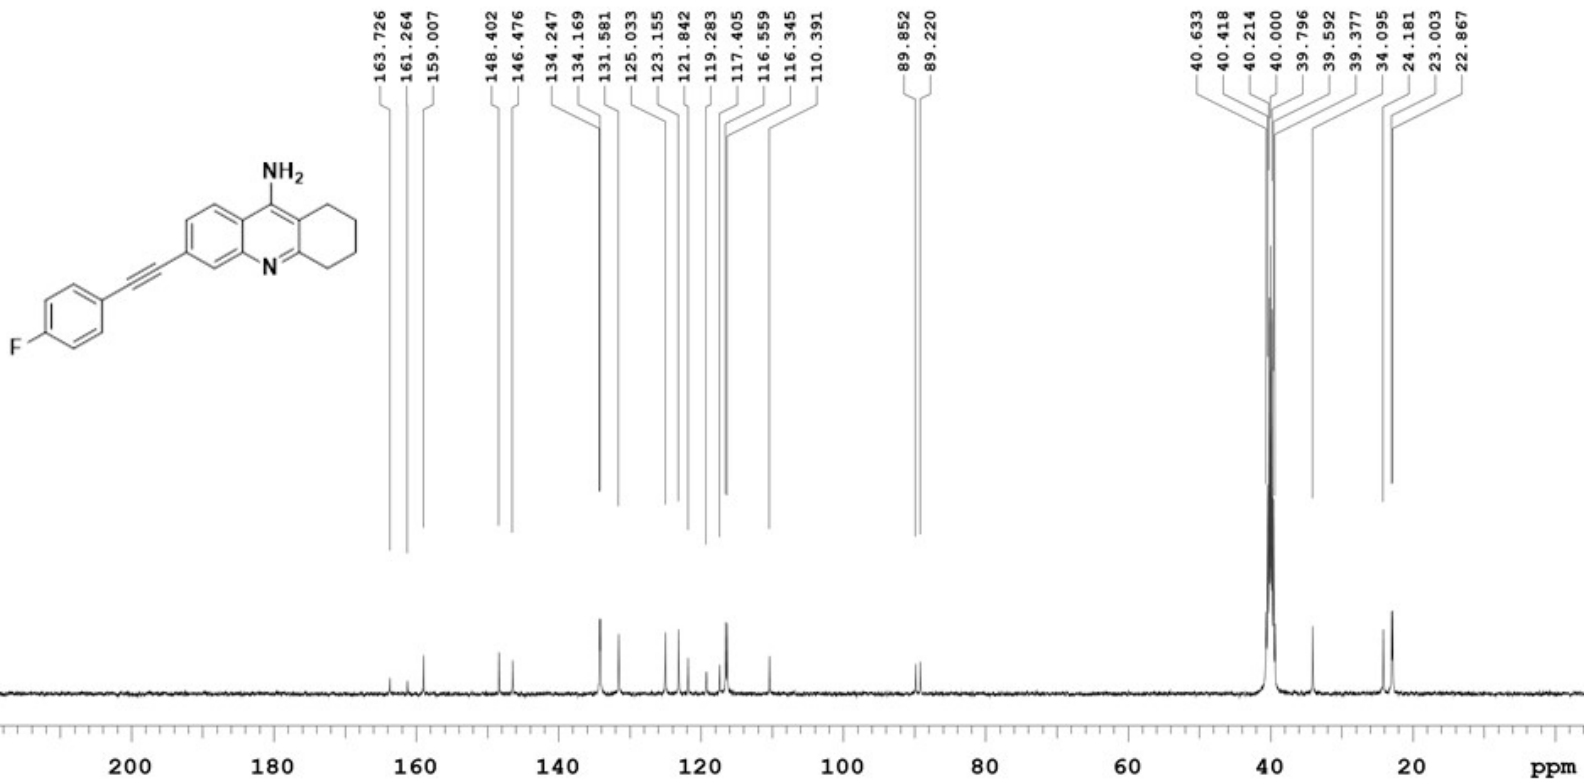

|                                                                                                                                                          |                                                                                                                                     |                                                                                                         |                                                                                                                               |
|----------------------------------------------------------------------------------------------------------------------------------------------------------|-------------------------------------------------------------------------------------------------------------------------------------|---------------------------------------------------------------------------------------------------------|-------------------------------------------------------------------------------------------------------------------------------|
| <p>PULSE SEQUENCE</p> <p>Relax. delay 1.000 sec</p> <p>Pulse 45.0 degrees</p> <p>Acq. time 1.022 sec</p> <p>Width 32051.3 Hz</p> <p>3000 repetitions</p> | <p>OBSERVE C13, 100.5356212</p> <p>DECOUPLE H1, 399.8251894</p> <p>Power 39 dB</p> <p>continuously on</p> <p>WALTZ-16 modulated</p> | <p>DATA PROCESSING</p> <p>Line broadening 2.5 Hz</p> <p>FT size 65536</p> <p>Total time 101 minutes</p> | <p>Solvent: dmsc</p> <p>Ambient temperature</p> <p>Operator: vnmr1</p> <p>File: TAD-51-13C</p> <p>VNMRS-400 "Agilent-NMR"</p> |
|----------------------------------------------------------------------------------------------------------------------------------------------------------|-------------------------------------------------------------------------------------------------------------------------------------|---------------------------------------------------------------------------------------------------------|-------------------------------------------------------------------------------------------------------------------------------|



<sup>1</sup>H NMR of Compound **9b**

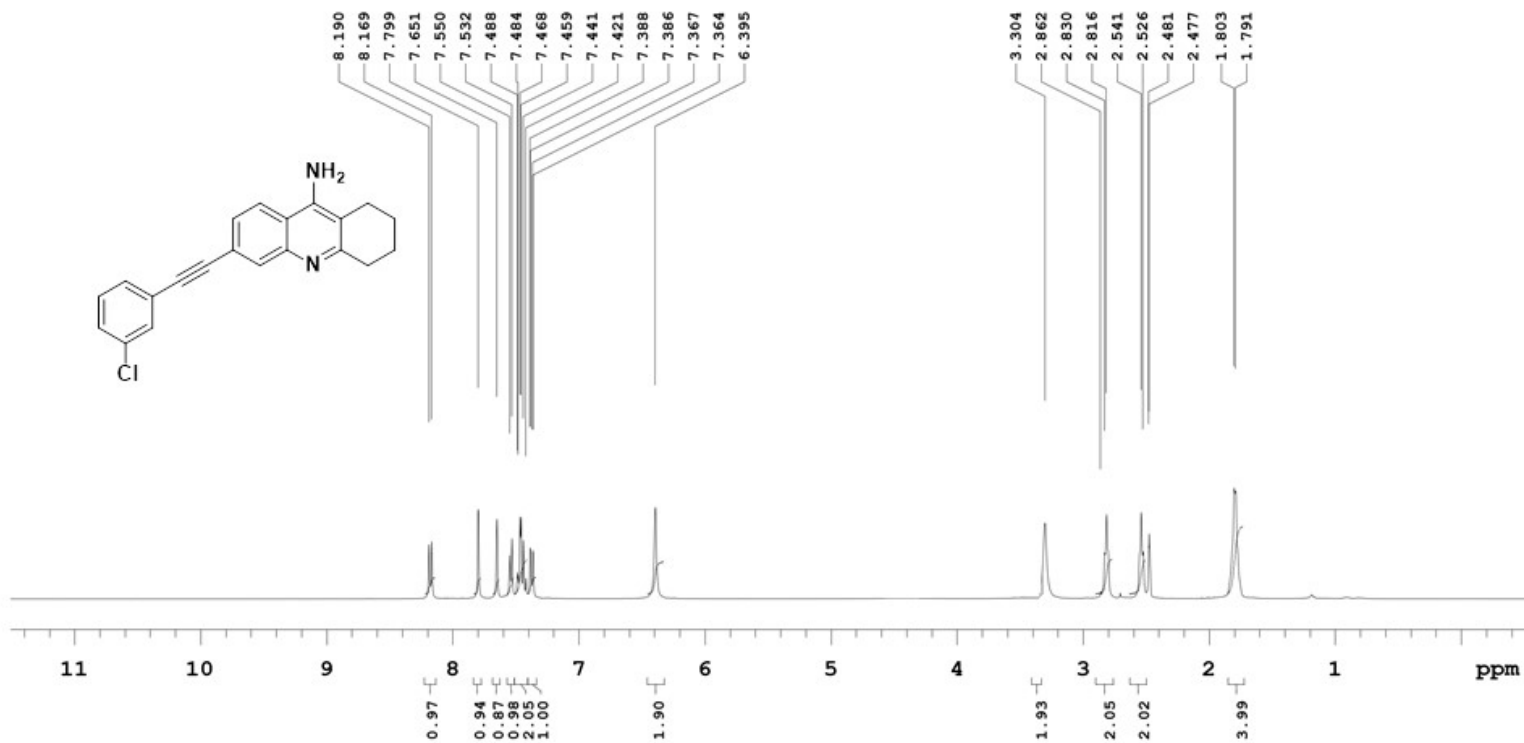

|                                                                                                                                                                                                                                    |                                       |                                                                                                                                                       |                                                                                                                                                                                      |
|------------------------------------------------------------------------------------------------------------------------------------------------------------------------------------------------------------------------------------|---------------------------------------|-------------------------------------------------------------------------------------------------------------------------------------------------------|--------------------------------------------------------------------------------------------------------------------------------------------------------------------------------------|
| <p><b>PULSE SEQUENCE</b><br/>                 Relax. delay 1.000 sec<br/>                 Pulse 45.0 degrees<br/>                 Acq. time 3.146 sec<br/>                 Width 10416.7 Hz<br/>                 8 repetitions</p> | <p><b>OBSERVE</b> H1, 399.8231903</p> | <p><b>DATA PROCESSING</b><br/>                 Line broadening 1.0 Hz<br/>                 FT size 65536<br/>                 Total time 1 minute</p> | <p>Solvent: dms0<br/>                 Ambient temperature<br/>                 Operator: vnmr1<br/>                 File: TAD-52-1H<br/>                 VNMR5-400 "Agilent-NMR"</p> |
|------------------------------------------------------------------------------------------------------------------------------------------------------------------------------------------------------------------------------------|---------------------------------------|-------------------------------------------------------------------------------------------------------------------------------------------------------|--------------------------------------------------------------------------------------------------------------------------------------------------------------------------------------|

<sup>13</sup>C NMR of Compound **9b**

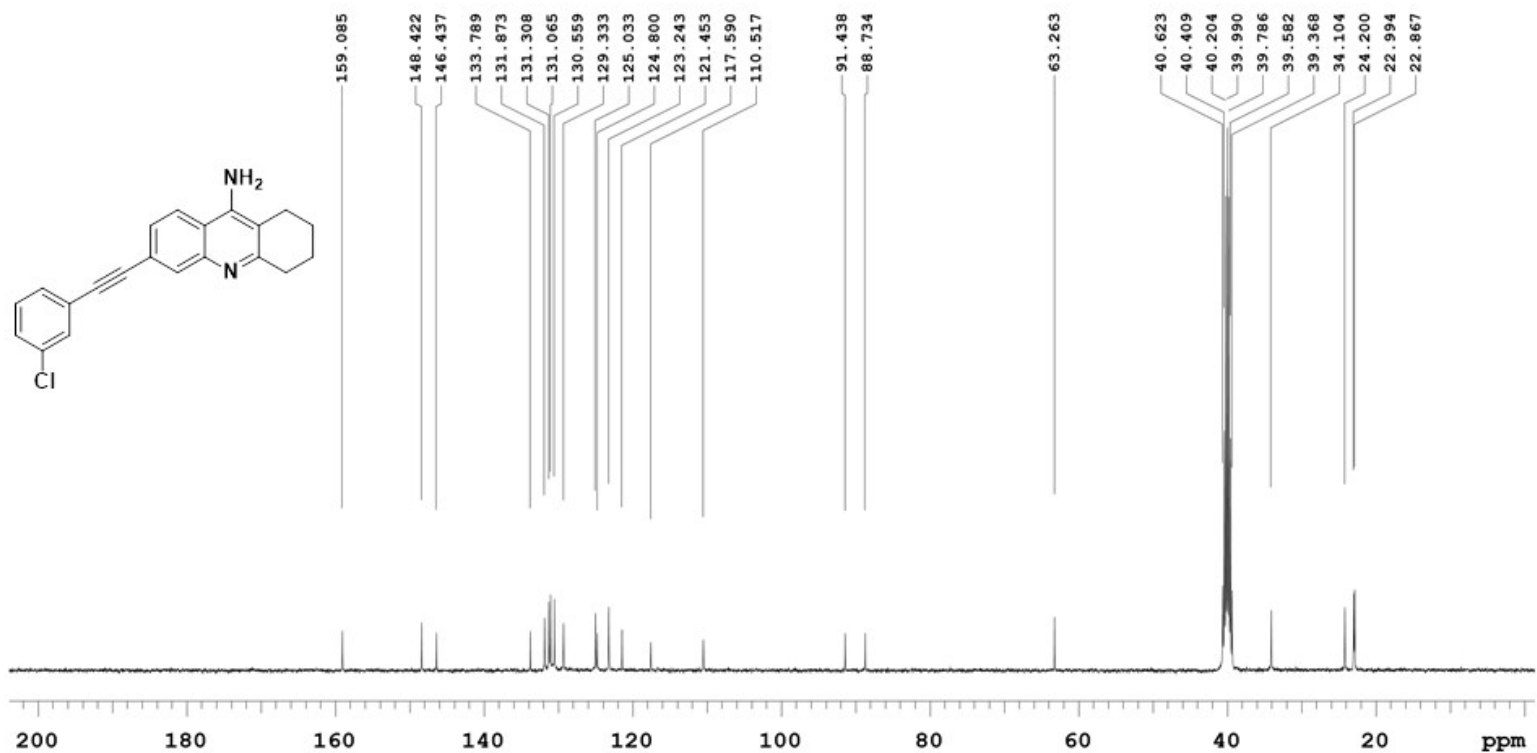

|                                                                                                                                      |                                                                                                                                   |                                                                                            |                                                                                                        |
|--------------------------------------------------------------------------------------------------------------------------------------|-----------------------------------------------------------------------------------------------------------------------------------|--------------------------------------------------------------------------------------------|--------------------------------------------------------------------------------------------------------|
| <b>PULSE SEQUENCE</b><br>Relax. delay 1.000 sec<br>Pulse 45.0 degrees<br>Acq. time 1.022 sec<br>Width 32051.3 Hz<br>2048 repetitions | <b>OBSERVE</b> C13, 100.5356212<br><b>DECOUPLE</b> H1, 399.8251894<br>Power 39 dB<br>continuously on<br><b>WALTZ-16</b> modulated | <b>DATA PROCESSING</b><br>Line broadening 2.5 Hz<br>FT size 65536<br>Total time 69 minutes | Solvent: dmso<br>Ambient temperature<br>Operator: vnmr1<br>File: TAD-52-13C<br>VNMR5-400 "Agilent-NMR" |
|--------------------------------------------------------------------------------------------------------------------------------------|-----------------------------------------------------------------------------------------------------------------------------------|--------------------------------------------------------------------------------------------|--------------------------------------------------------------------------------------------------------|

<sup>1</sup>H NMR of Compound 9c

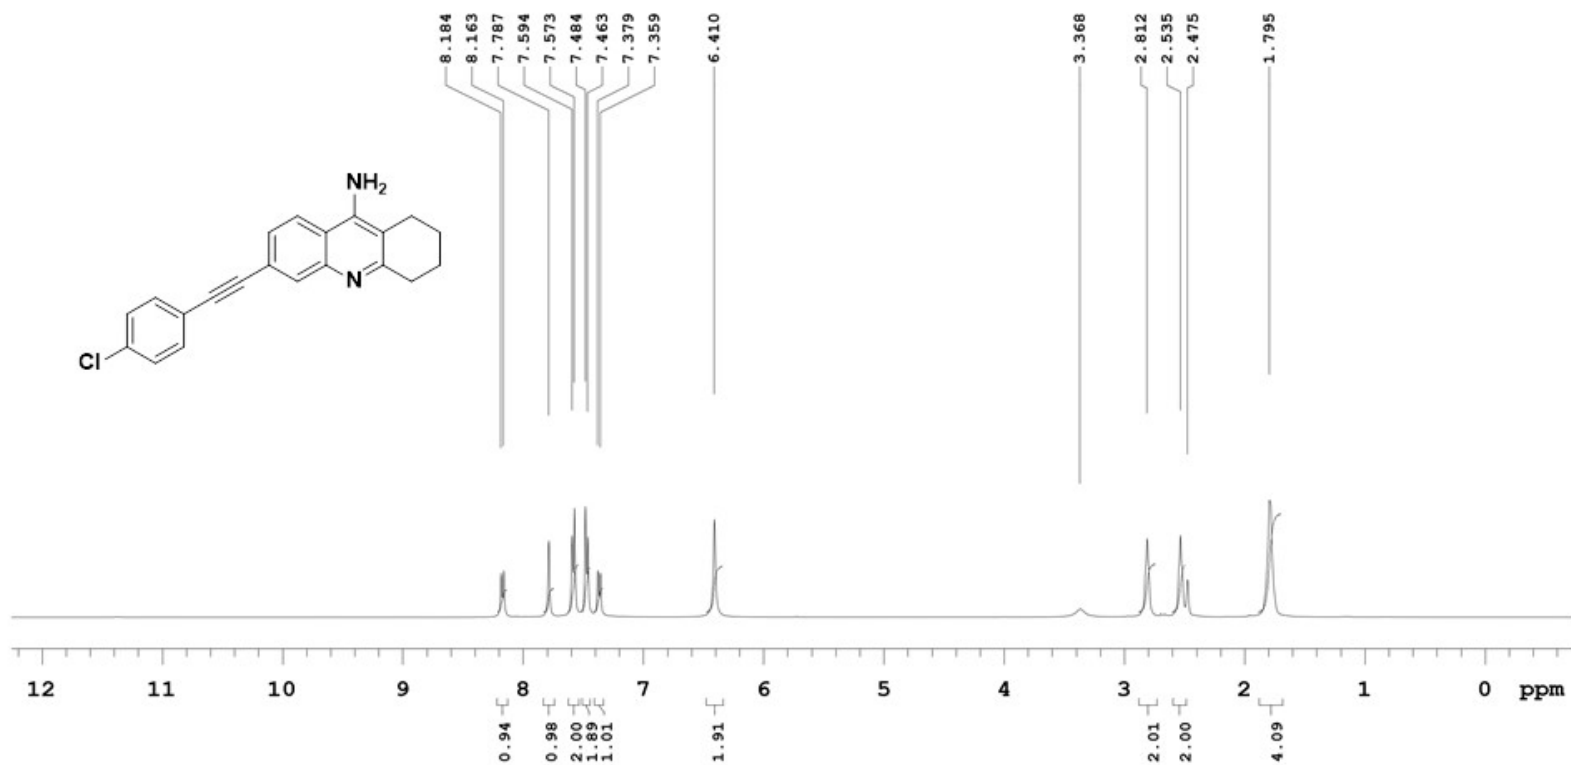

|                                                                                                                                                                                                                                    |                                       |                                                                                                                                                       |                                                                                                                                                                                      |
|------------------------------------------------------------------------------------------------------------------------------------------------------------------------------------------------------------------------------------|---------------------------------------|-------------------------------------------------------------------------------------------------------------------------------------------------------|--------------------------------------------------------------------------------------------------------------------------------------------------------------------------------------|
| <p><b>PULSE SEQUENCE</b><br/>                 Relax. delay 1.000 sec<br/>                 Pulse 45.0 degrees<br/>                 Acq. time 3.146 sec<br/>                 Width 10416.7 Hz<br/>                 8 repetitions</p> | <p><b>OBSERVE</b> H1, 399.8231903</p> | <p><b>DATA PROCESSING</b><br/>                 Line broadening 1.0 Hz<br/>                 FT size 65536<br/>                 Total time 1 minute</p> | <p>Solvent: dmsc<br/>                 Ambient temperature<br/>                 Operator: vnmr1<br/>                 File: TAD-53-1H<br/>                 VNMRS-400 "Agilent-NMR"</p> |
|------------------------------------------------------------------------------------------------------------------------------------------------------------------------------------------------------------------------------------|---------------------------------------|-------------------------------------------------------------------------------------------------------------------------------------------------------|--------------------------------------------------------------------------------------------------------------------------------------------------------------------------------------|

<sup>13</sup>C NMR of Compound **9c**

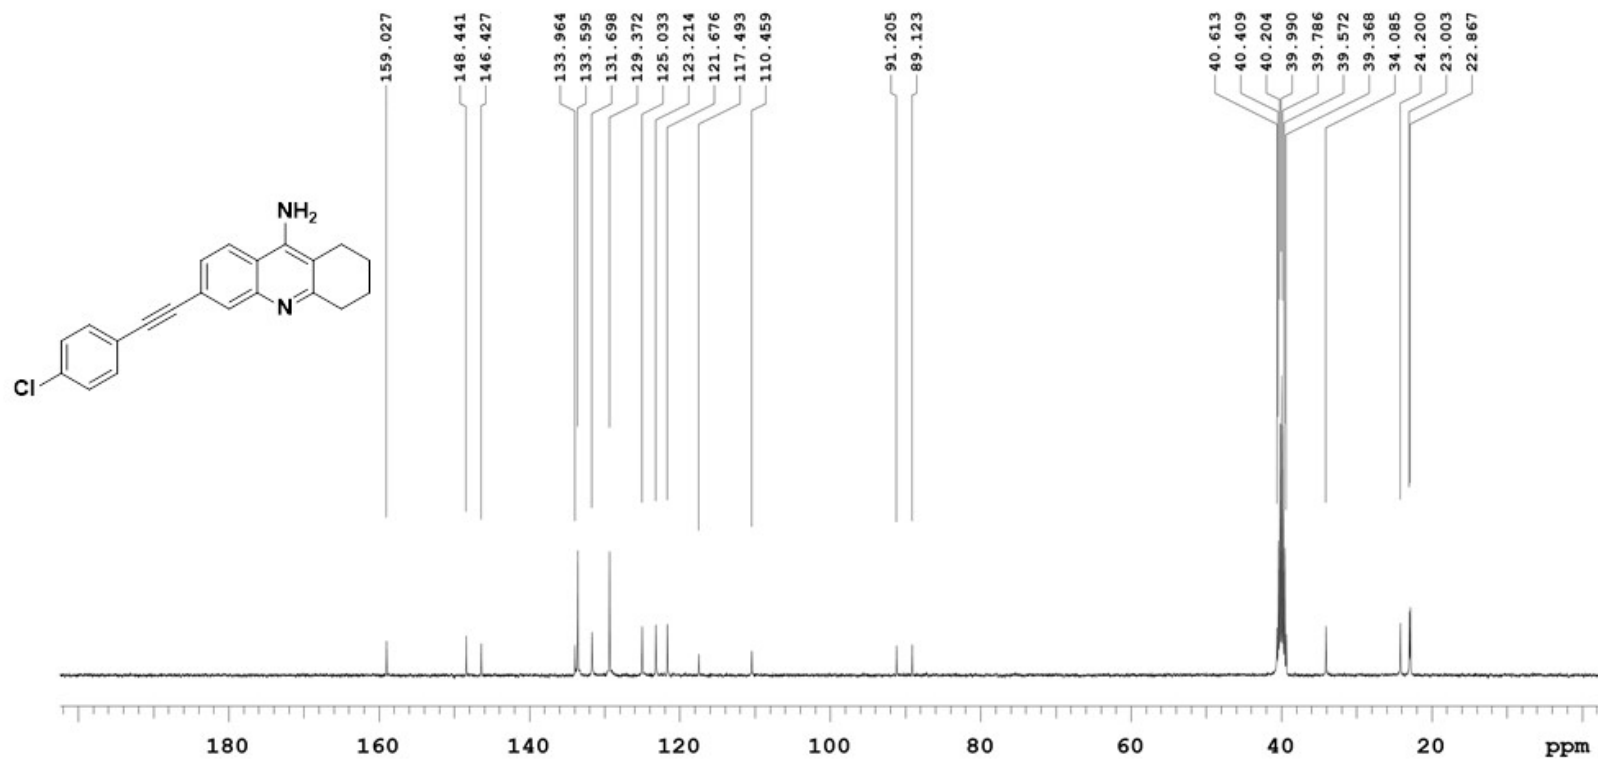

|                                                                                                                                                                                                                                      |                                                                                                                                                                                           |                                                                                                                                                         |                                                                                                                                                                                       |
|--------------------------------------------------------------------------------------------------------------------------------------------------------------------------------------------------------------------------------------|-------------------------------------------------------------------------------------------------------------------------------------------------------------------------------------------|---------------------------------------------------------------------------------------------------------------------------------------------------------|---------------------------------------------------------------------------------------------------------------------------------------------------------------------------------------|
| <p><b>PULSE SEQUENCE</b><br/>                 Relax. delay 1.000 sec<br/>                 Pulse 45.0 degrees<br/>                 Acq. time 1.022 sec<br/>                 Width 32051.3 Hz<br/>                 854 repetitions</p> | <p><b>OBSERVE</b> C13, 100.5356212<br/> <b>DECOUPLE</b> H1, 399.8251894<br/>                 Power 39 dB<br/>                 continuously on<br/>                 WALTZ-16 modulated</p> | <p><b>DATA PROCESSING</b><br/>                 Line broadening 2.5 Hz<br/>                 FT size 65536<br/>                 Total time 28 minutes</p> | <p>Solvent: dmsd<br/>                 Ambient temperature<br/>                 Operator: vnmr1<br/>                 File: TAD-53-13C<br/>                 VNMR5-400 "Agilent-NMR"</p> |
|--------------------------------------------------------------------------------------------------------------------------------------------------------------------------------------------------------------------------------------|-------------------------------------------------------------------------------------------------------------------------------------------------------------------------------------------|---------------------------------------------------------------------------------------------------------------------------------------------------------|---------------------------------------------------------------------------------------------------------------------------------------------------------------------------------------|

<sup>1</sup>H NMR of Compound **9d**

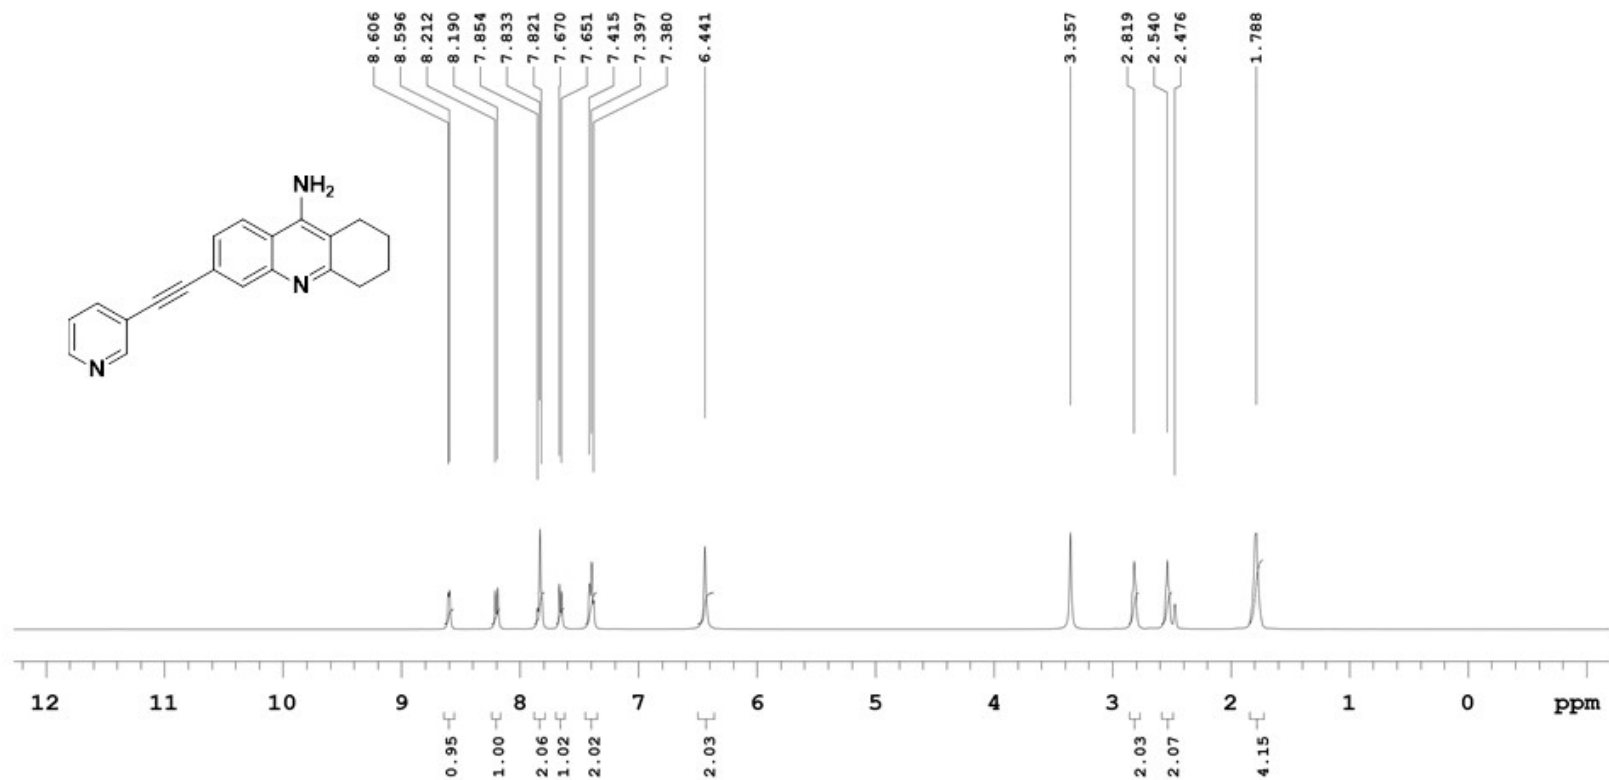

|                                                                                                                                                                                                                             |                                |                                                                                                                                                |                                                                                                                                                                                      |
|-----------------------------------------------------------------------------------------------------------------------------------------------------------------------------------------------------------------------------|--------------------------------|------------------------------------------------------------------------------------------------------------------------------------------------|--------------------------------------------------------------------------------------------------------------------------------------------------------------------------------------|
| <p>PULSE SEQUENCE<br/>                 Relax. delay 1.000 sec<br/>                 Pulse 45.0 degrees<br/>                 Acq. time 3.146 sec<br/>                 Width 10416.7 Hz<br/>                 8 repetitions</p> | <p>OBSERVE H1, 399.8231903</p> | <p>DATA PROCESSING<br/>                 Line broadening 1.0 Hz<br/>                 FT size 65536<br/>                 Total time 1 minute</p> | <p>Solvent: dms0<br/>                 Ambient temperature<br/>                 Operator: vnmr1<br/>                 File: TAD-54-1H<br/>                 VNMRS-400 "Agilent-NMR"</p> |
|-----------------------------------------------------------------------------------------------------------------------------------------------------------------------------------------------------------------------------|--------------------------------|------------------------------------------------------------------------------------------------------------------------------------------------|--------------------------------------------------------------------------------------------------------------------------------------------------------------------------------------|

<sup>13</sup>C NMR of Compound 9d

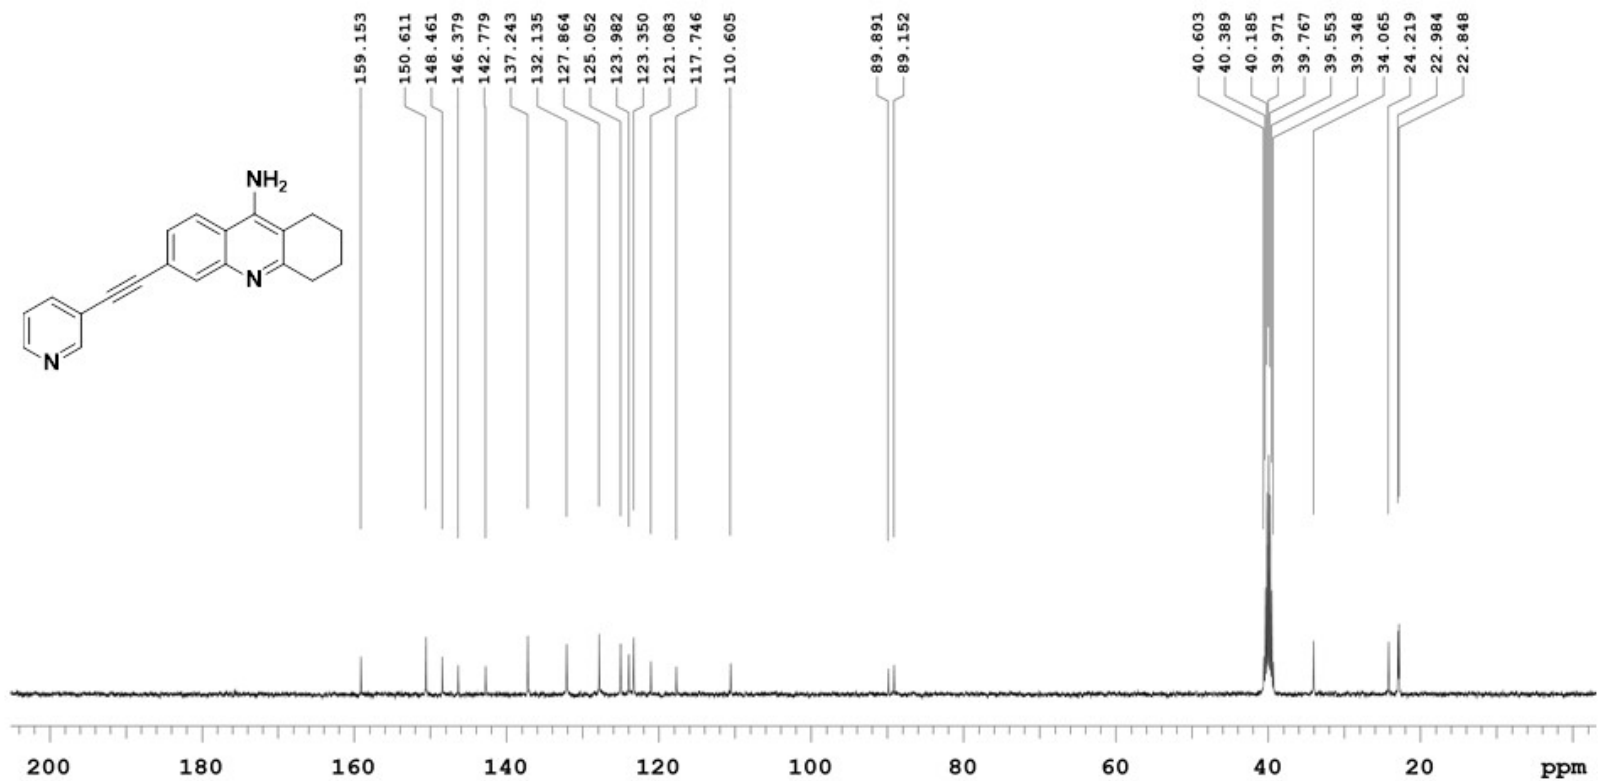

|                                                                                                                                                                                                                                      |                                                                                                                                                                                           |                                                                                                                                                        |                                                                                                                                                                                       |
|--------------------------------------------------------------------------------------------------------------------------------------------------------------------------------------------------------------------------------------|-------------------------------------------------------------------------------------------------------------------------------------------------------------------------------------------|--------------------------------------------------------------------------------------------------------------------------------------------------------|---------------------------------------------------------------------------------------------------------------------------------------------------------------------------------------|
| <p><b>PULSE SEQUENCE</b><br/>                 Relax. delay 1.000 sec<br/>                 Pulse 45.0 degrees<br/>                 Acq. time 1.022 sec<br/>                 Width 32051.3 Hz<br/>                 216 repetitions</p> | <p><b>OBSERVE</b> C13, 100.5356212<br/> <b>DECOUPLE</b> H1, 399.8251894<br/>                 Power 39 dB<br/>                 continuously on<br/>                 WALTZ-16 modulated</p> | <p><b>DATA PROCESSING</b><br/>                 Line broadening 2.5 Hz<br/>                 FT size 65536<br/>                 Total time 7 minutes</p> | <p>Solvent: dmsd<br/>                 Ambient temperature<br/>                 Operator: vnmr1<br/>                 File: TAD-54-13C<br/>                 VNMR5-400 "Agilent-NMR"</p> |
|--------------------------------------------------------------------------------------------------------------------------------------------------------------------------------------------------------------------------------------|-------------------------------------------------------------------------------------------------------------------------------------------------------------------------------------------|--------------------------------------------------------------------------------------------------------------------------------------------------------|---------------------------------------------------------------------------------------------------------------------------------------------------------------------------------------|

<sup>1</sup>H NMR of Compound **11a**

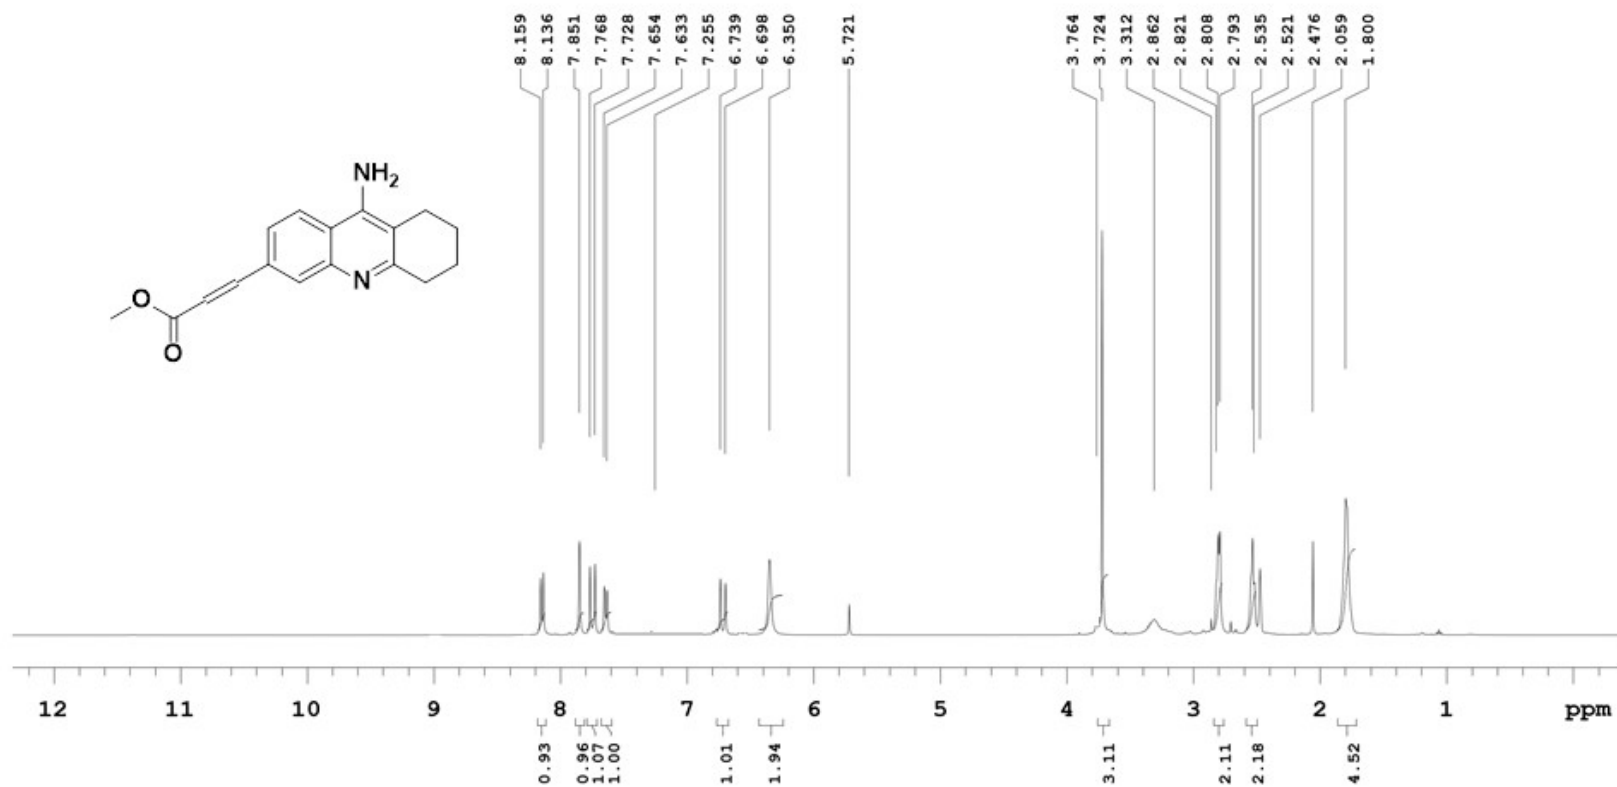

|                                                                                                                                    |                                |                                                                                          |                                                                                                       |
|------------------------------------------------------------------------------------------------------------------------------------|--------------------------------|------------------------------------------------------------------------------------------|-------------------------------------------------------------------------------------------------------|
| <b>PULSE SEQUENCE</b><br>Relax. delay 2.000 sec<br>Pulse 45.0 degrees<br>Acq. time 3.146 sec<br>Width 10416.7 Hz<br>16 repetitions | <b>OBSERVE</b> H1, 399.8231903 | <b>DATA PROCESSING</b><br>Line broadening 1.0 Hz<br>FT size 65536<br>Total time 1 minute | Solvent: dmsd<br>Ambient temperature<br>Operator: vnmr1<br>File: TAD-55-1H<br>VNMR5-400 "Agilent-NMR" |
|------------------------------------------------------------------------------------------------------------------------------------|--------------------------------|------------------------------------------------------------------------------------------|-------------------------------------------------------------------------------------------------------|

<sup>13</sup>C NMR of Compound 11a

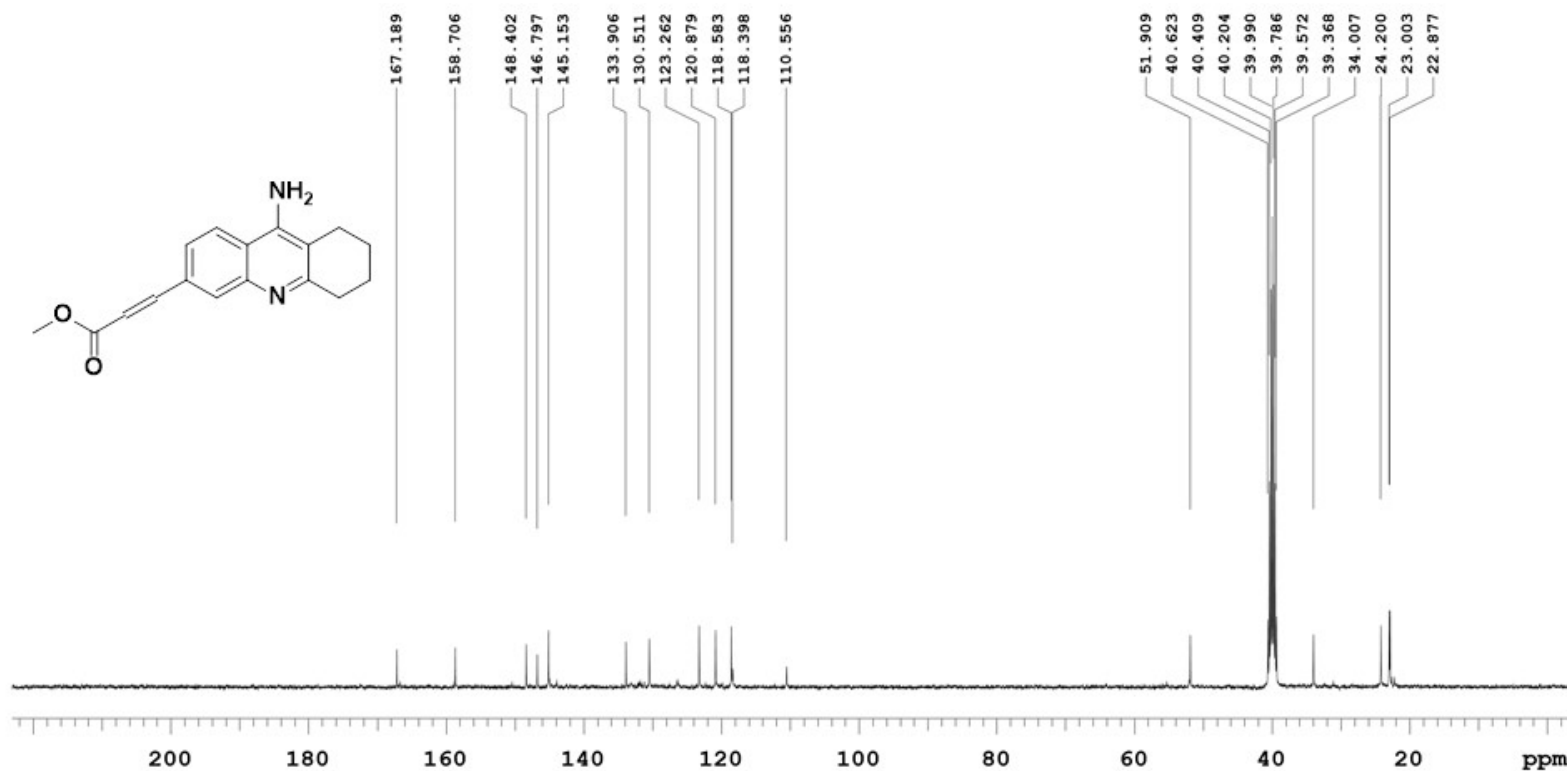

|                                                                                                                                                          |                                                                                                                                     |                                                                                                        |                                                                                                |
|----------------------------------------------------------------------------------------------------------------------------------------------------------|-------------------------------------------------------------------------------------------------------------------------------------|--------------------------------------------------------------------------------------------------------|------------------------------------------------------------------------------------------------|
| <p>PULSE SEQUENCE</p> <p>Relax. delay 1.000 sec</p> <p>Pulse 45.0 degrees</p> <p>Acq. time 1.022 sec</p> <p>Width 32051.3 Hz</p> <p>1520 repetitions</p> | <p>OBSERVE C13, 100.5356212</p> <p>DECOUPLE H1, 399.8251894</p> <p>Power 39 dB</p> <p>continuously on</p> <p>WALTZ-16 modulated</p> | <p>DATA PROCESSING</p> <p>Line broadening 2.5 Hz</p> <p>FT size 65536</p> <p>Total time 51 minutes</p> | <p>Solvent: dmsc</p> <p>Ambient temperature</p> <p>Operator: vnmr1</p> <p>File: TAD-55-13C</p> |
|----------------------------------------------------------------------------------------------------------------------------------------------------------|-------------------------------------------------------------------------------------------------------------------------------------|--------------------------------------------------------------------------------------------------------|------------------------------------------------------------------------------------------------|



<sup>1</sup>H NMR of Compound **11b**

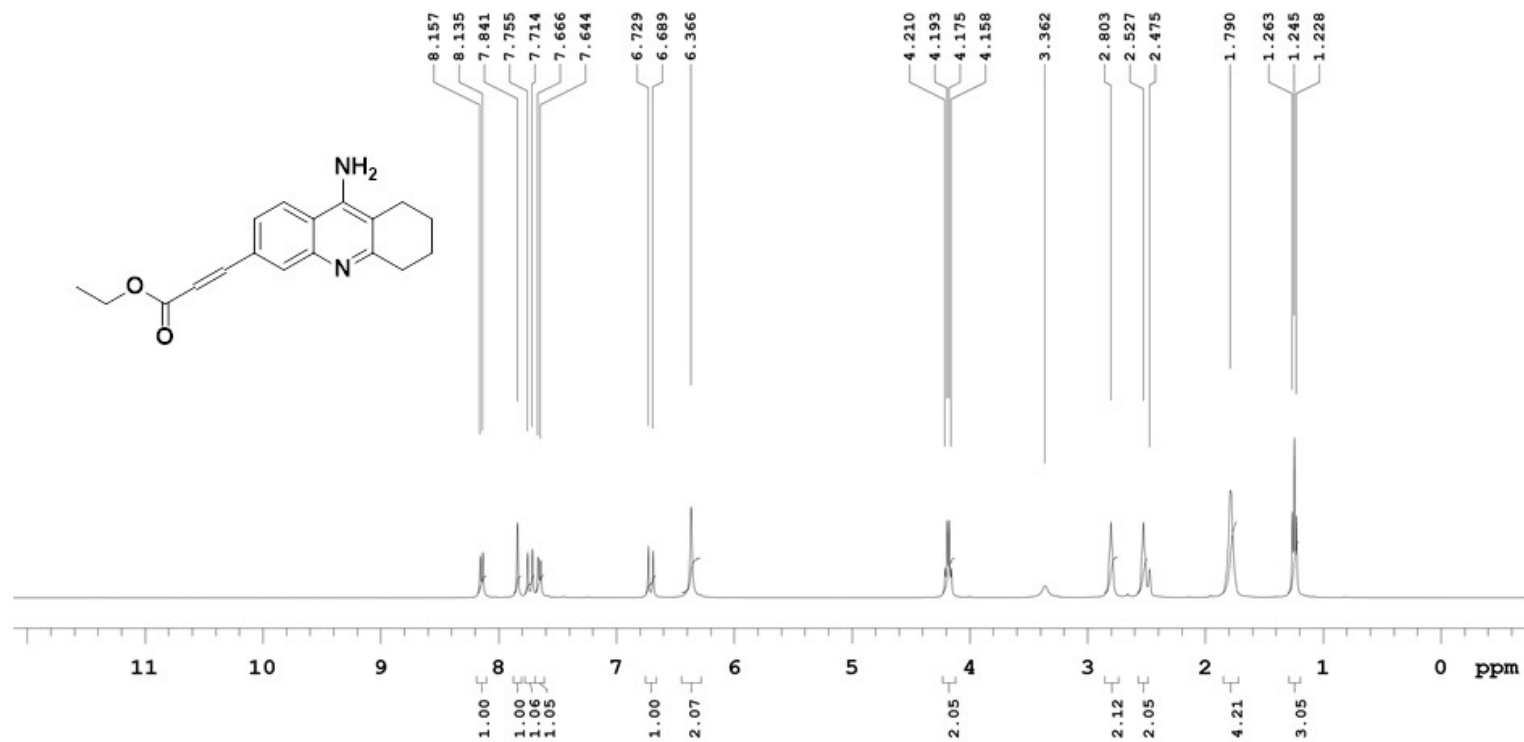

|                                                                                                                                                                                                                                                        |                                |                                                                                                                                                                   |                                                                                                                                                                                                      |
|--------------------------------------------------------------------------------------------------------------------------------------------------------------------------------------------------------------------------------------------------------|--------------------------------|-------------------------------------------------------------------------------------------------------------------------------------------------------------------|------------------------------------------------------------------------------------------------------------------------------------------------------------------------------------------------------|
| <p><b>PULSE SEQUENCE</b><br/>                     Relax. delay 1.000 sec<br/>                     Pulse 45.0 degrees<br/>                     Acq. time 3.146 sec<br/>                     Width 10416.7 Hz<br/>                     8 repetitions</p> | <p>OBSERVE H1, 399.8231903</p> | <p><b>DATA PROCESSING</b><br/>                     Line broadening 1.0 Hz<br/>                     FT size 65536<br/>                     Total time 1 minute</p> | <p>Solvent: dmso<br/>                     Ambient temperature<br/>                     Operator: vnmr1<br/>                     File: TAD-56-1H<br/>                     VNMR5-400 "Agilent-NMR"</p> |
|--------------------------------------------------------------------------------------------------------------------------------------------------------------------------------------------------------------------------------------------------------|--------------------------------|-------------------------------------------------------------------------------------------------------------------------------------------------------------------|------------------------------------------------------------------------------------------------------------------------------------------------------------------------------------------------------|

<sup>13</sup>C NMR of Compound 11b

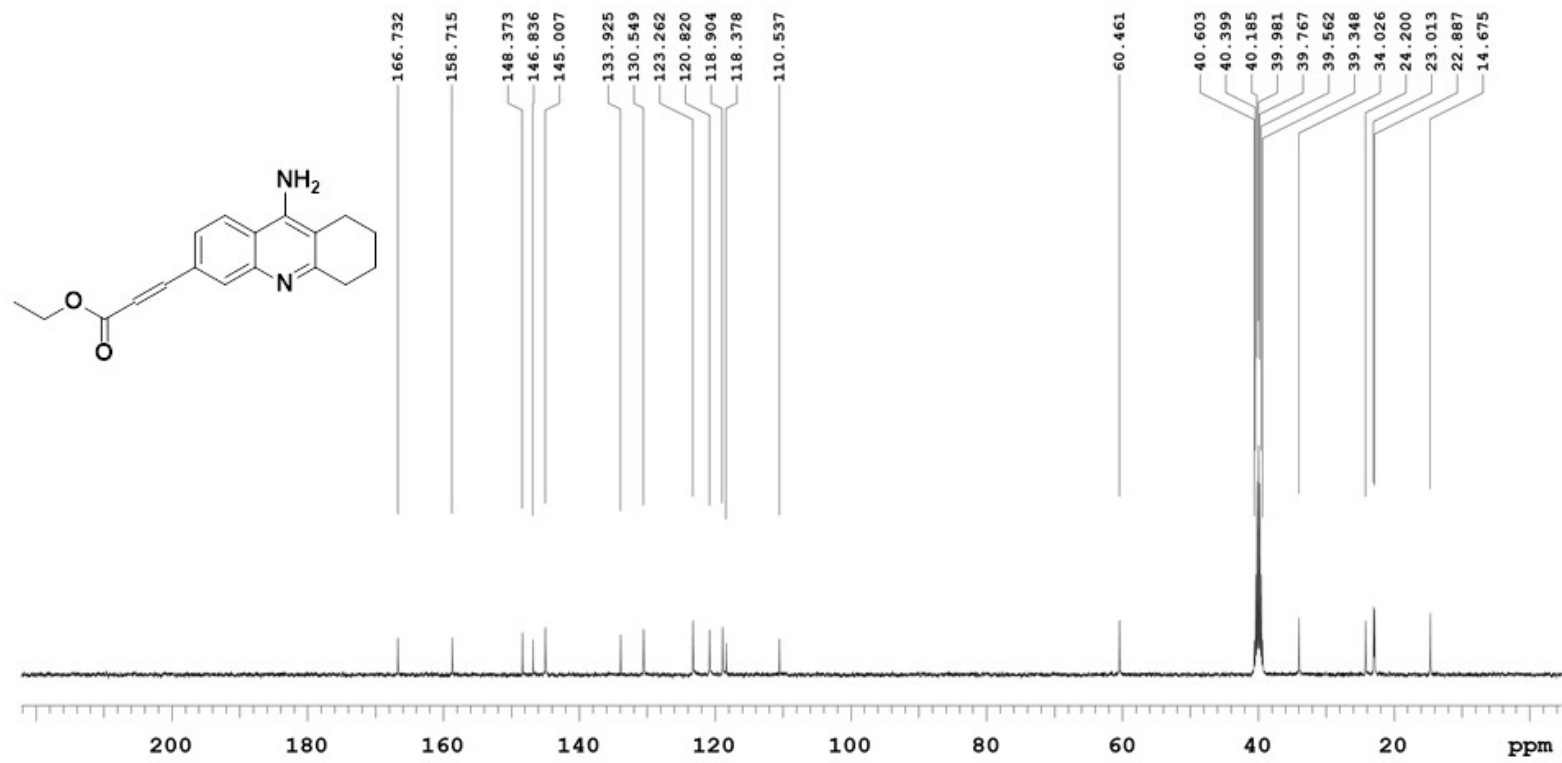

|                                                                                                                                                                                                                                      |                                                                                                                                                                                           |                                                                                                                                                         |                                                                                                                                                                                       |
|--------------------------------------------------------------------------------------------------------------------------------------------------------------------------------------------------------------------------------------|-------------------------------------------------------------------------------------------------------------------------------------------------------------------------------------------|---------------------------------------------------------------------------------------------------------------------------------------------------------|---------------------------------------------------------------------------------------------------------------------------------------------------------------------------------------|
| <p><b>PULSE SEQUENCE</b><br/>                 Relax. delay 1.000 sec<br/>                 Pulse 45.0 degrees<br/>                 Acq. time 1.022 sec<br/>                 Width 32051.3 Hz<br/>                 320 repetitions</p> | <p><b>OBSERVE</b> C13, 100.5356212<br/> <b>DECOUPLE</b> H1, 399.8251894<br/>                 Power 39 dB<br/>                 continuously on<br/>                 WALTZ-16 modulated</p> | <p><b>DATA PROCESSING</b><br/>                 Line broadening 2.5 Hz<br/>                 FT size 65536<br/>                 Total time 10 minutes</p> | <p>Solvent: dmsd<br/>                 Ambient temperature<br/>                 Operator: vnmr1<br/>                 File: TAD-56-13C<br/>                 VNMRS-400 "Agilent-NMR"</p> |
|--------------------------------------------------------------------------------------------------------------------------------------------------------------------------------------------------------------------------------------|-------------------------------------------------------------------------------------------------------------------------------------------------------------------------------------------|---------------------------------------------------------------------------------------------------------------------------------------------------------|---------------------------------------------------------------------------------------------------------------------------------------------------------------------------------------|

<sup>1</sup>H NMR of Compound **11c**

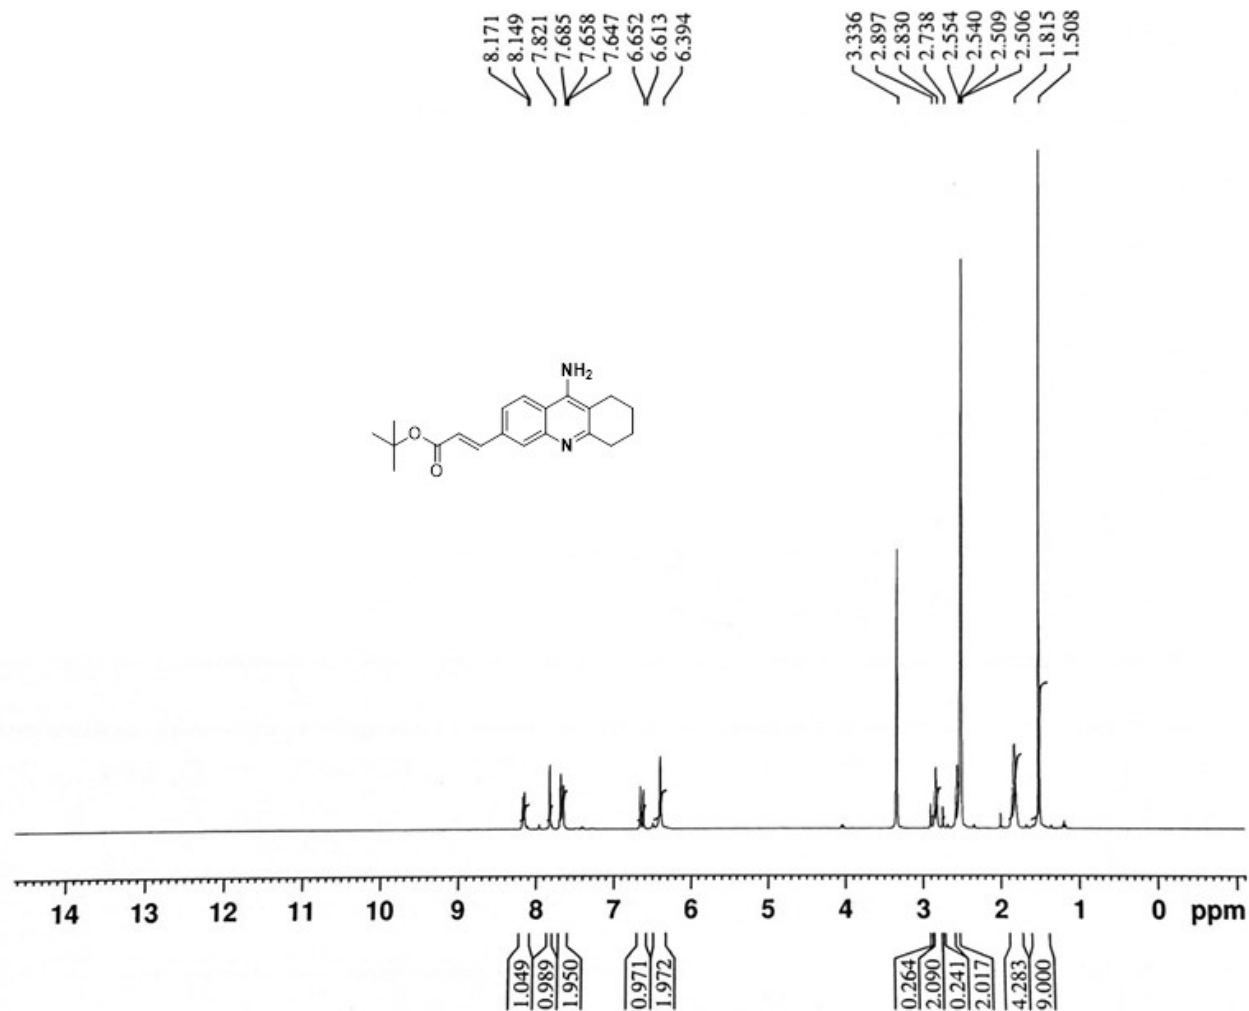

F2 - Acquisition Parameters

INSTRUM AVNeo 400 Nanobay  
 PROBHD Z163739\_0178 (  
 PULPROG zg30  
 TD 32768  
 SOLVENT DMSO  
 NS 16  
 DS 2  
 SWH 8196.722 Hz  
 FIDRES 0.500288 Hz  
 AQ 1.9988480 sec  
 RG 101  
 DW 61.000 usec  
 DE 13.89 usec  
 TE 296.6 K  
 D1 1.00000000 sec  
 TD0 1  
 SFO1 400.5324733 MHz  
 NUC1 1H  
 P0 2.67 usec  
 P1 8.00 usec  
 PLW1 21.78599930 W

F2 - Processing parameters

SI 65536  
 SF 400.5300000 MHz  
 WDW EM  
 SSB 0  
 LB 0.30 Hz  
 GB 0  
 PC 1.00

<sup>13</sup>C NMR of Compound 11c

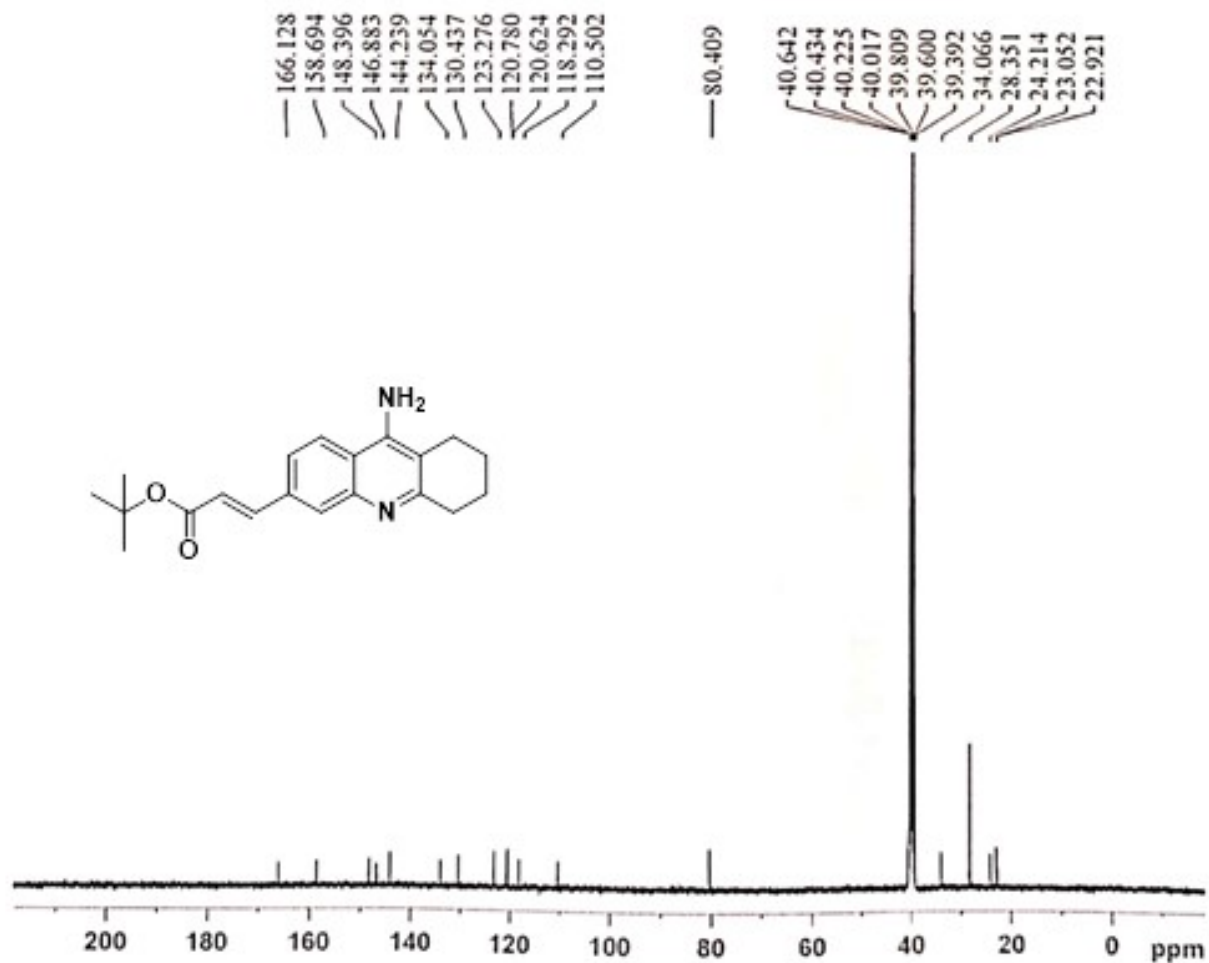

```

INSTRUM  AT960 400 Masobay
PRORND   1143739_0178 (
PULPROG  zgpg30
TD        32748
SOLVENT   DMSO
NS        1500
DS        4
SMH       23809.521 Hz
FIDRES    1.453218 Hz
AQ        0.4881280 sec
RG        101
DM        21.000 sec
DE        4.50 sec
TE        300.3 K
D1        2.00000000 sec
D11       9.03000000 sec
TD0       1
SFO1      100.7234139 MHz
NUC1      13C
PD        2.67 sec
P1        9.00 sec
PLW1      91.51399994 W
SFO2      400.5314021 MHz
NUC2      1H
CPDPRG2   waltz65
PCPD2     90.00 sec
PLW2      21.78599930 W
PLW12     0.17214000 W
PLW13     0.08444800 W

F2 - Processing parameters
SI        32748
SF        100.7133484 MHz
WDW       EM
SSB       0
LB        1.00 Hz
GB        0
PC        1.40
    
```

<sup>1</sup>H NMR of Compound **11d**

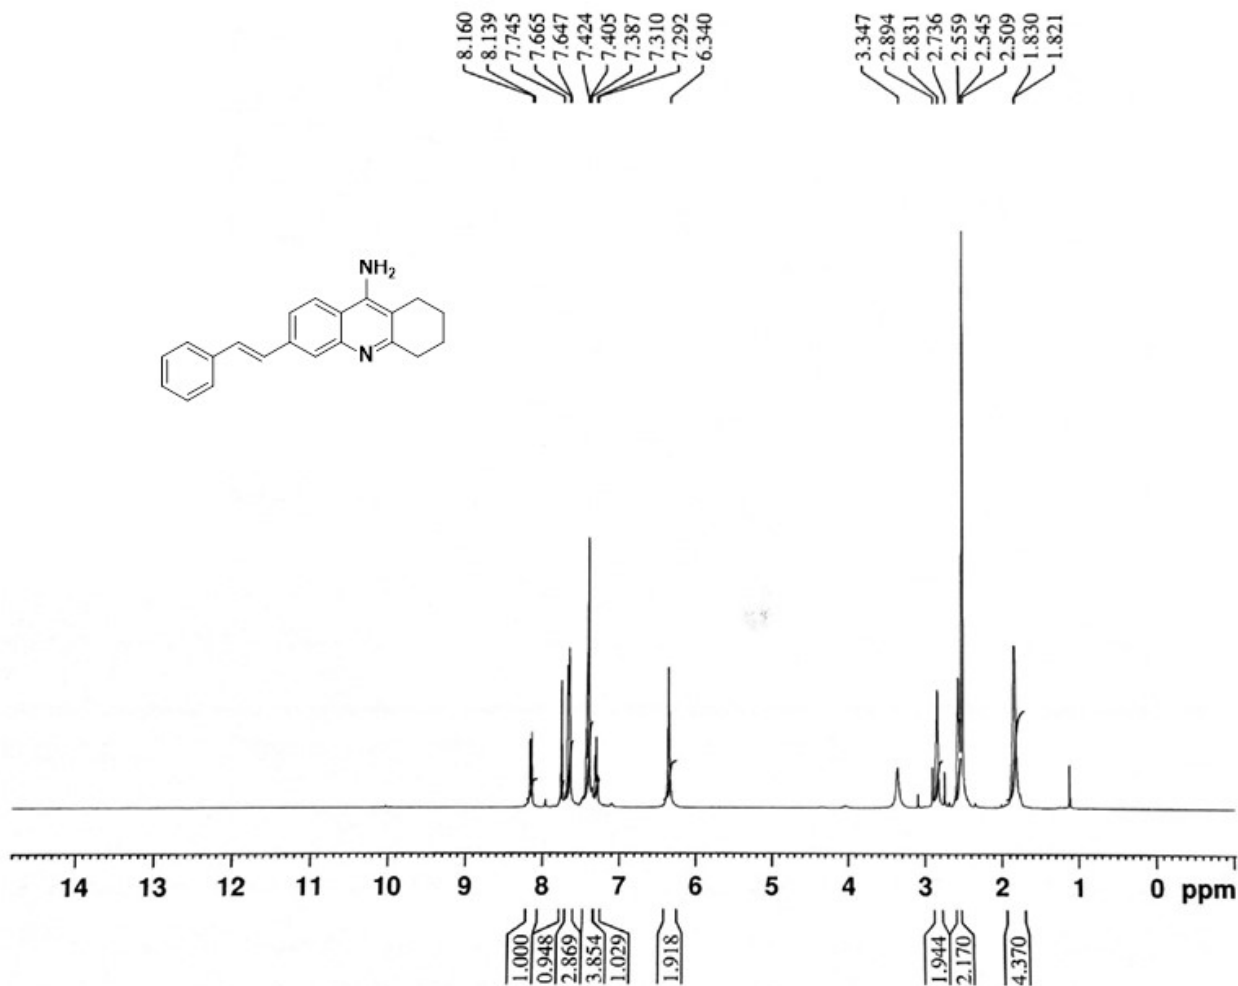

Current Data Parameters

|                             |                   |
|-----------------------------|-------------------|
| EXPNO                       | 1                 |
| PROCNO                      | 1                 |
| F2 - Acquisition Parameters |                   |
| INSTRUM                     | AVNeo 400 Nanobay |
| PROBHD                      | Z163739_0178 (    |
| PULPROG                     | zg30              |
| TD                          | 32768             |
| SOLVENT                     | DMSO              |
| NS                          | 16                |
| DS                          | 2                 |
| SWH                         | 8196.722 Hz       |
| FIDRES                      | 0.500288 Hz       |
| AQ                          | 1.9988480 sec     |
| RG                          | 101               |
| DW                          | 61.000 usec       |
| DE                          | 13.89 usec        |
| TE                          | 296.6 K           |
| D1                          | 1.00000000 sec    |
| TDO                         | 1                 |
| SFO1                        | 400.5324733 MHz   |
| NUC1                        | 1H                |
| PO                          | 2.67 usec         |
| P1                          | 8.00 usec         |
| PLW1                        | 21.78599930 W     |
| F2 - Processing parameters  |                   |
| SI                          | 65536             |
| SF                          | 400.5300000 MHz   |
| WDW                         | EM                |
| SSB                         | 0                 |
| LB                          | 0.30 Hz           |
| GB                          | 0                 |
| PC                          | 1.00              |

<sup>13</sup>C NMR of Compound 11d

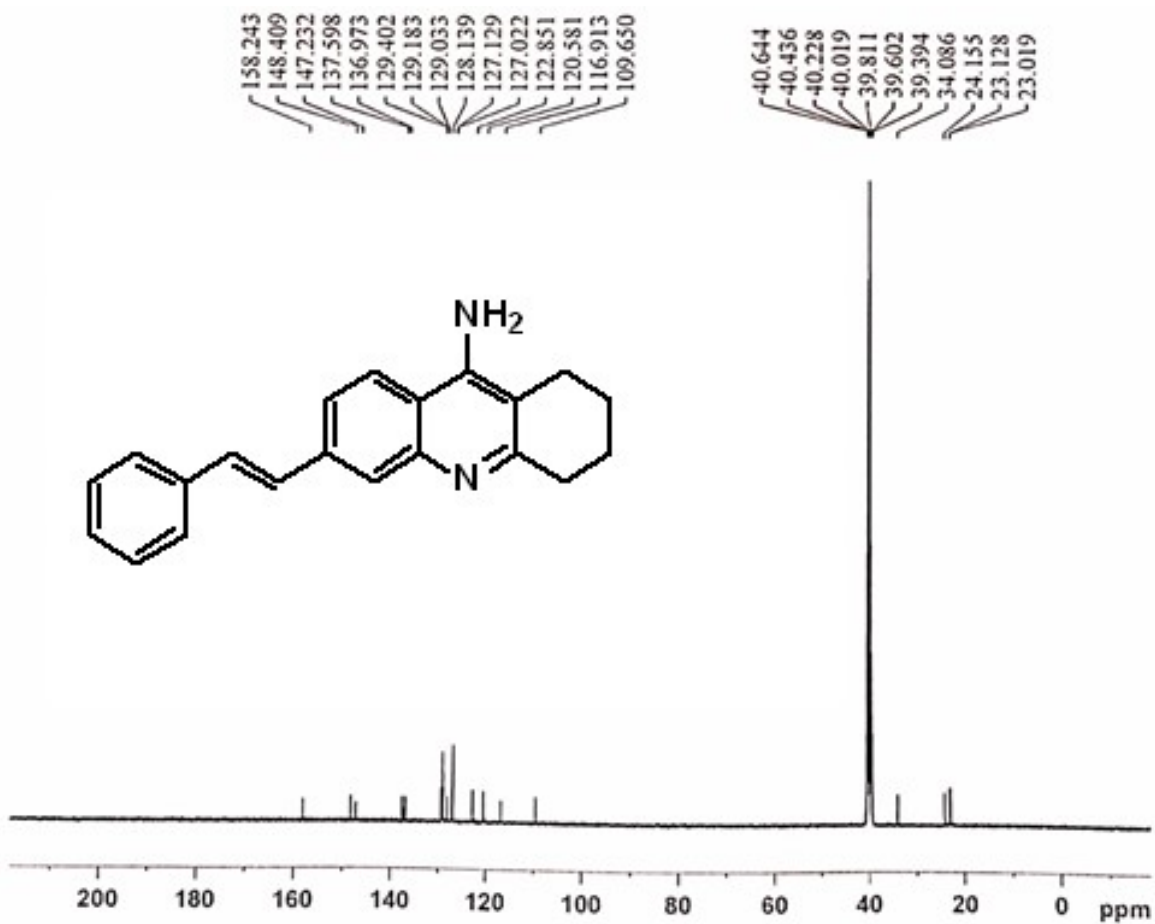

```

INSTRUM  ATNco 400 Masobay
PROBHD   2163739 0179 (
PULPROG  zgpg30
TD       32768
SOLVENT  DMSO
NS       1250
DS       4
SWE      23809.523 Hz
FIDRES   1.453218 Hz
AQ       0.6891280 sec
RG       101
DS       21.000 ssec
SE       6.50 ssec
TE       300.5 K
D1       2.00000000 sec
D11      0.03000000 sec
TDO      1
SFO1     100.7234199 MHz
NUC1     13C
P0       2.67 ssec
P1       8.00 ssec
PLW1     91.51399994 W
SFO2     400.5116021 MHz
NUC2     1H
CPCPRG(2) waltz165
PCPD2    90.00 ssec
PLW2     21.78599930 W
PLW12    0.17214000 W
PLW13    0.08644800 W

F2 - Processing parameters
SI       32768
SF       100.7133486 MHz
WDW      EM
SSB      0
LA       1.00 Hz
GB       0
PC       1.40
    
```

<sup>1</sup>H NMR of Compound **13a**

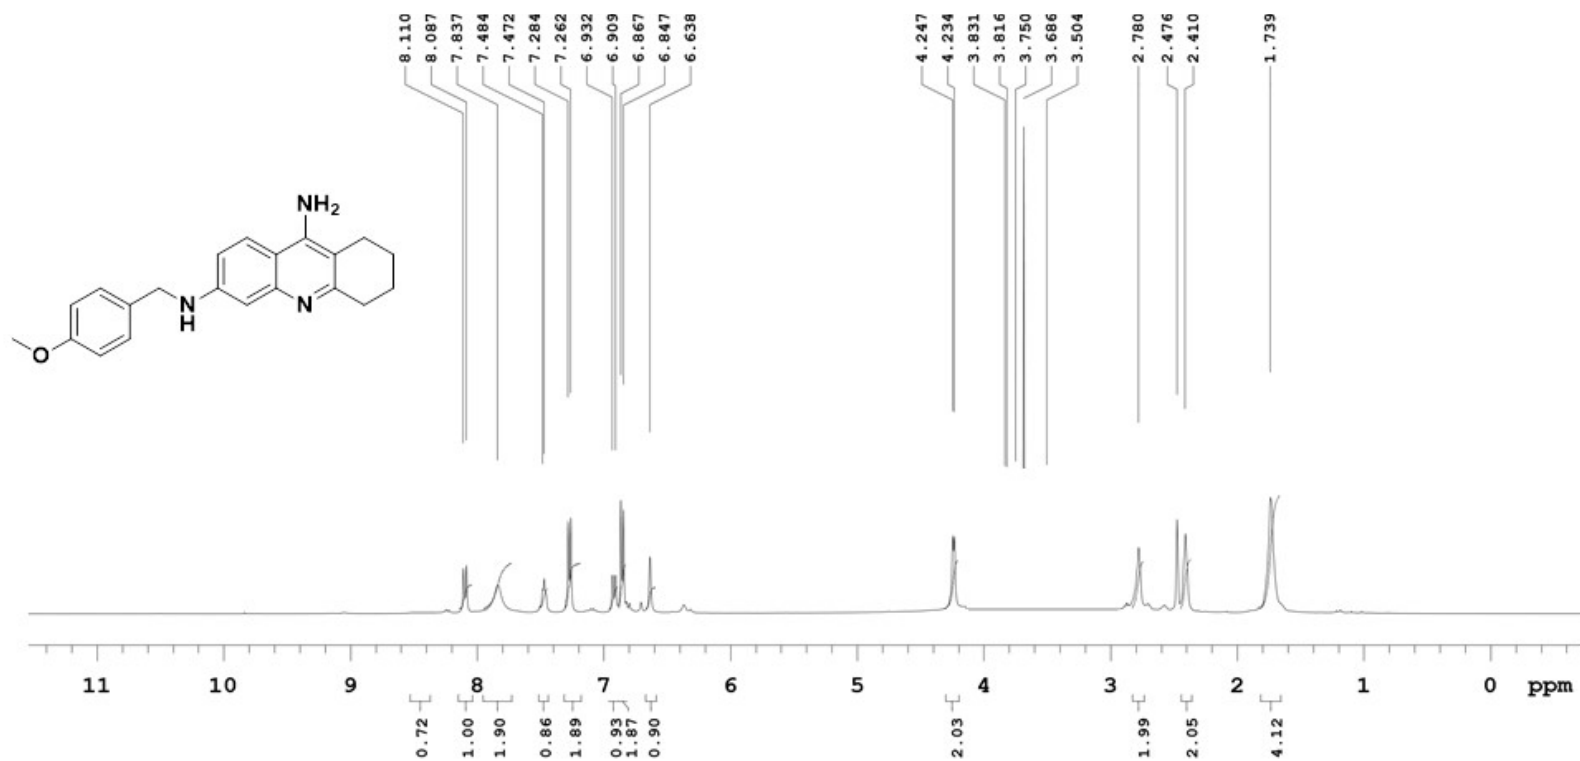

|                                                                                                                                   |                                |                                                                                          |                                                                                                       |
|-----------------------------------------------------------------------------------------------------------------------------------|--------------------------------|------------------------------------------------------------------------------------------|-------------------------------------------------------------------------------------------------------|
| <b>PULSE SEQUENCE</b><br>Relax. delay 1.000 sec<br>Pulse 45.0 degrees<br>Acq. time 3.146 sec<br>Width 10416.7 Hz<br>8 repetitions | <b>OBSERVE</b> H1, 399.8231903 | <b>DATA PROCESSING</b><br>Line broadening 1.0 Hz<br>FT size 65536<br>Total time 1 minute | Solvent: dms0<br>Ambient temperature<br>Operator: vnmr1<br>File: TAD-63-1H<br>VNMRS-400 "Agilent-NMR" |
|-----------------------------------------------------------------------------------------------------------------------------------|--------------------------------|------------------------------------------------------------------------------------------|-------------------------------------------------------------------------------------------------------|

<sup>13</sup>C NMR of Compound 13a

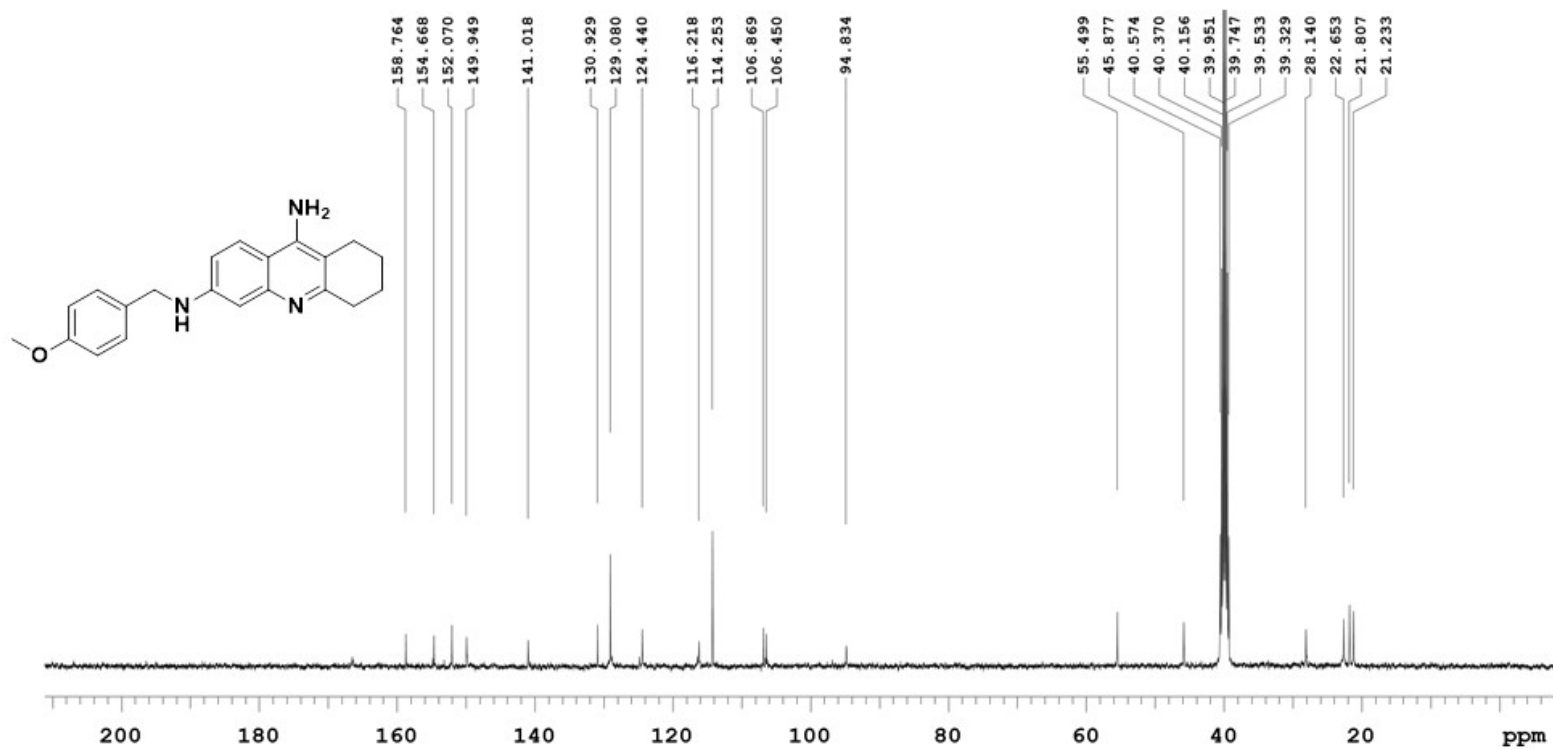

|                                                                                                                                                                                                                                       |                                                                                                                                                                                           |                                                                                                                                                         |                                                                                                                                                                                       |
|---------------------------------------------------------------------------------------------------------------------------------------------------------------------------------------------------------------------------------------|-------------------------------------------------------------------------------------------------------------------------------------------------------------------------------------------|---------------------------------------------------------------------------------------------------------------------------------------------------------|---------------------------------------------------------------------------------------------------------------------------------------------------------------------------------------|
| <p><b>PULSE SEQUENCE</b><br/>                 Relax. delay 1.000 sec<br/>                 Pulse 45.0 degrees<br/>                 Acq. time 1.022 sec<br/>                 Width 32051.3 Hz<br/>                 1074 repetitions</p> | <p><b>OBSERVE</b> C13, 100.5356212<br/> <b>DECOUPLE</b> H1, 399.8251894<br/>                 Power 39 dB<br/>                 continuously on<br/>                 WALTZ-16 modulated</p> | <p><b>DATA PROCESSING</b><br/>                 Line broadening 2.5 Hz<br/>                 FT size 65536<br/>                 Total time 36 minutes</p> | <p>Solvent: dmso<br/>                 Ambient temperature<br/>                 Operator: vnmri<br/>                 File: TAD-63-13C<br/>                 VNMR5-400 "Agilent-NMR"</p> |
|---------------------------------------------------------------------------------------------------------------------------------------------------------------------------------------------------------------------------------------|-------------------------------------------------------------------------------------------------------------------------------------------------------------------------------------------|---------------------------------------------------------------------------------------------------------------------------------------------------------|---------------------------------------------------------------------------------------------------------------------------------------------------------------------------------------|



# <sup>1</sup>H NMR of Compound 13b

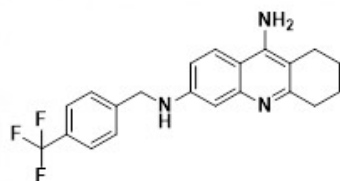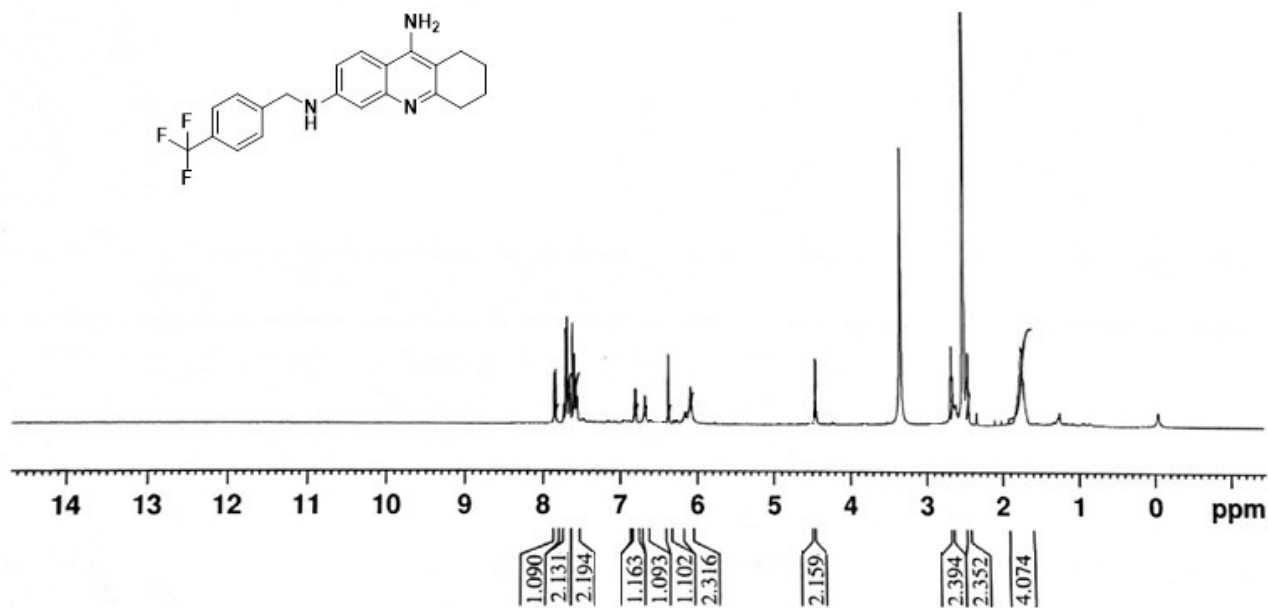

Current Data Parameters

|                             |                   |
|-----------------------------|-------------------|
| EXPNO                       | 1                 |
| PROCNO                      | 1                 |
| F2 - Acquisition Parameters |                   |
| INSTRUM                     | AVNeo 400 Nanobay |
| PROBHD                      | Z163739_0178 (    |
| PULPROG                     | zg30              |
| TD                          | 32768             |
| SOLVENT                     | DMSO              |
| NS                          | 16                |
| DS                          | 2                 |
| SWH                         | 8196.722 Hz       |
| FIDRES                      | 0.500288 Hz       |
| AQ                          | 1.9988480 sec     |
| RG                          | 101               |
| DW                          | 61.000 usec       |
| DE                          | 13.89 usec        |
| TE                          | 295.8 K           |
| D1                          | 1.00000000 sec    |
| TD0                         | 1                 |
| SFO1                        | 400.5324733 MHz   |
| NUC1                        | 1H                |
| P0                          | 2.67 usec         |
| P1                          | 8.00 usec         |
| PLW1                        | 21.78599930 W     |
| F2 - Processing parameters  |                   |
| SI                          | 65536             |
| SF                          | 400.5300000 MHz   |
| WDW                         | EM                |
| SSB                         | 0                 |
| LB                          | 0.30 Hz           |
| GB                          | 0                 |
| PC                          | 1.00              |

<sup>13</sup>C NMR of Compound 13b

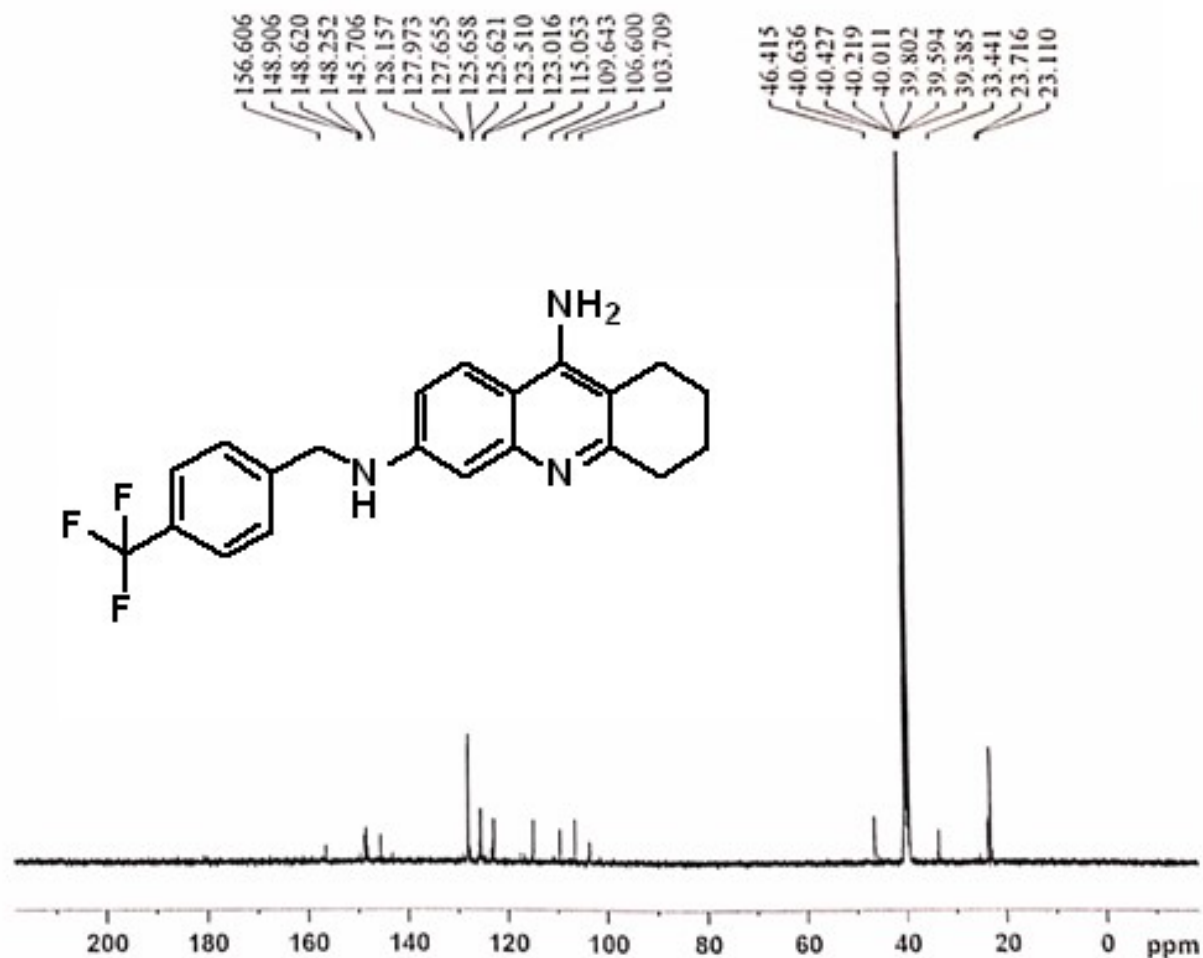

```

INSTRUM  AVBo 400 Varoay
PROBHD   1163739_0179 (
PULPROG  zgpg30
TD       32768
SOLVENT  DMSO
NS       1250
DS       4
SWE      23809.523 Hz
FIDRES   1.453213 Hz
AQ       0.4881280 sec
RG       101
DM       21.000 usec
DE       4.50 usec
TE       300.5 K
D1       2.00000000 sec
D11      0.03000000 sec
TD0      1
SFO1     100.7234139 MHz
NUC1     13C
PQ       2.67 usec
P1       8.00 usec
PLM1     91.51399994 W
SFO2     400.5316021 MHz
NUC2     1H
CPDPRG2  waltz163
PCPD2    90.00 usec
PLM2     21.78599930 W
PLM12    0.17214000 W
PLM13    0.08644000 W

F2 - Processing parameters
SI       32768
SF       100.7133404 MHz
WDW      EM
SSB      0
LA       1.00 Hz
GB       0
PC       1.40
    
```

# <sup>1</sup>H NMR of Compound 13c

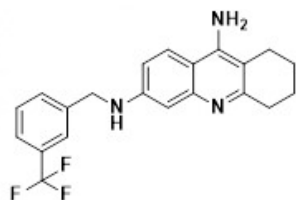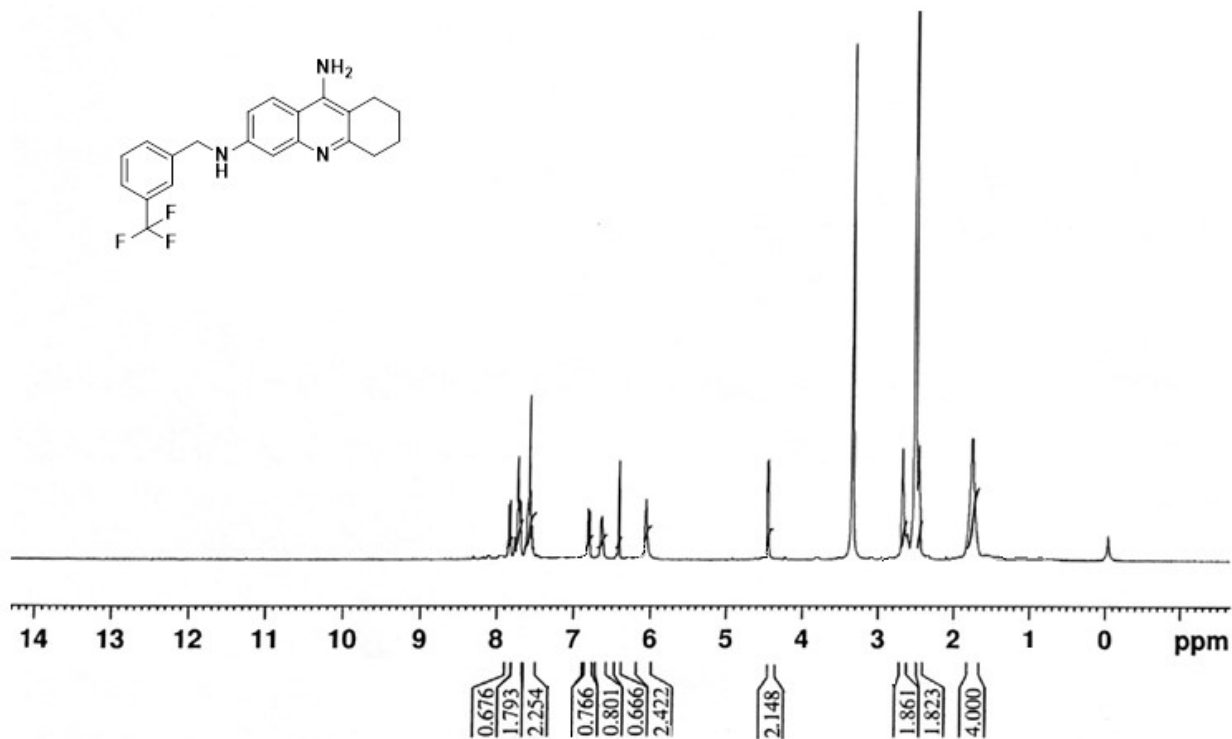

Current Data Parameters  
EXPNO 1  
PROCNO 1  
F2 - Acquisition Parameters  
INSTRUM AVNeo 400 Nanobay  
PROBHD Z163739\_0178 (  
PULPROG zg30  
TD 32768  
SOLVENT DMSO  
NS 16  
DS 2  
SWH 8196.722 Hz  
FIDRES 0.500288 Hz  
AQ 1.9988480 sec  
RG 101  
DW 61.000 usec  
DE 13.89 usec  
TE 296.5 K  
D1 2.00000000 sec  
TD0 1  
SFO1 400.5324733 MHz  
NUC1 1H  
P0 2.67 usec  
P1 8.00 usec  
PLW1 21.78599930 W

F2 - Processing parameters  
SI 65536  
SF 400.5300000 MHz  
WDW EM  
SSB 0  
LB 0.30 Hz  
GB 0  
PC 1.00

<sup>13</sup>C NMR of Compound 13c

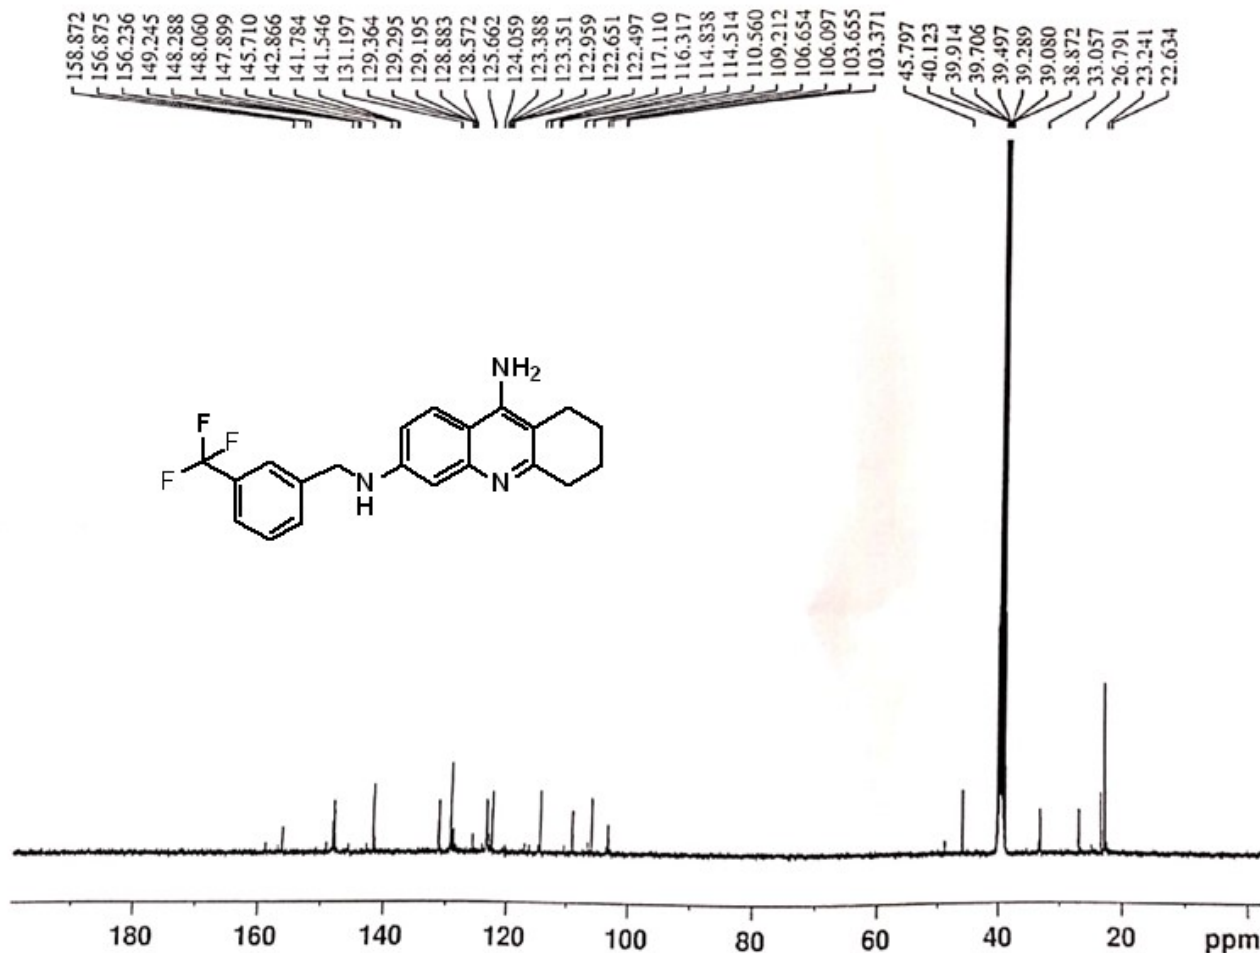

```

INSTRUM AVNeo 400 Nanobay
PROBHD 3163739_0178 (
PULPROG zgpg30
TD 32768
SOLVENT DMSO
NS 2000
DS 4
SMH 23809.523 Hz
FIDRES 1.453218 Hz
AQ 0.6881280 sec
RG 101
DW 21.000 usec
DE 6.50 usec
TE 298.3 K
D1 2.00000000 sec
D11 0.03000000 sec
TD0 1
SFO1 100.7234199 MHz
NUC1 13C
P0 2.67 usec
P1 8.00 usec
PLW1 91.51399994 W
SFO2 400.5316021 MHz
NUC2 1H
CPDPRG[2] waltz65
PCPD2 90.00 usec
PLW2 21.78599930 W
PLW12 0.17214000 W
PLW13 0.08644800 W
  
```

```

F2 - Processing parameters
SI 32768
SF 100.7133994 MHz
WDW EM
SSB 0
LB 1.00 Hz
GB 0
PC 1.40
  
```

<sup>1</sup>H NMR of Compound 13d

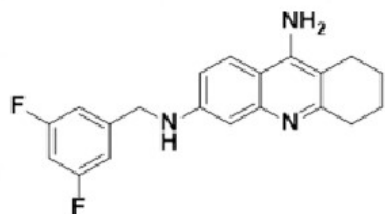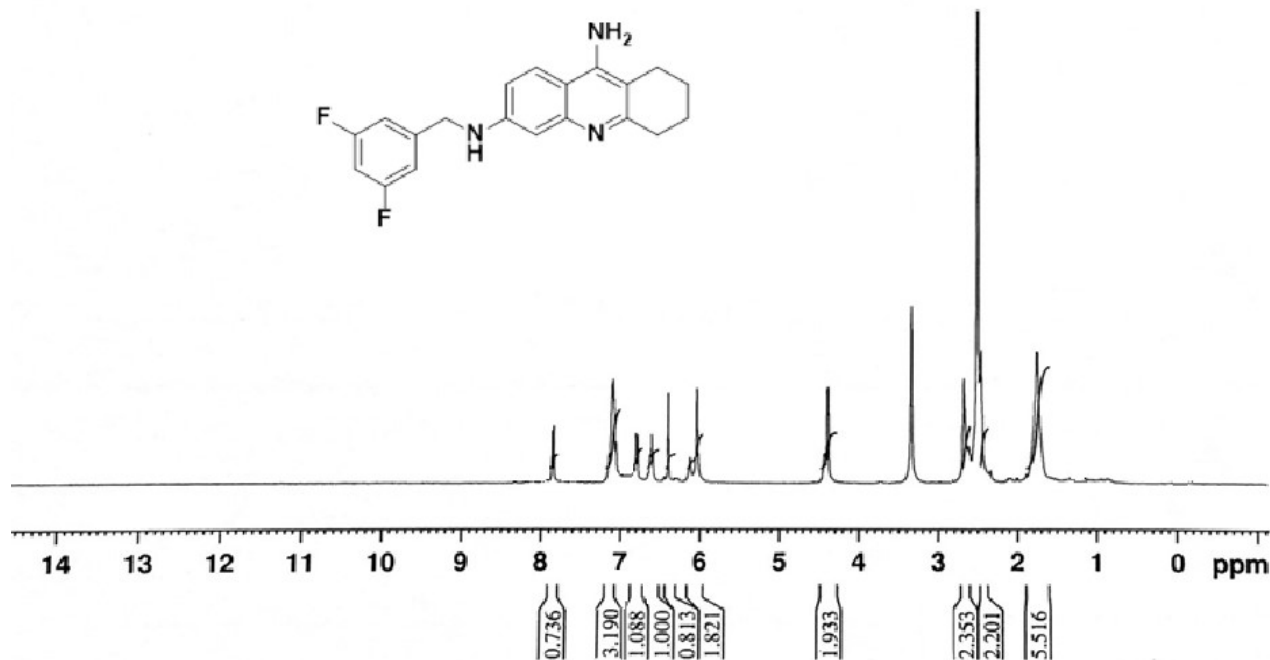

F2 - Acquisition Parameters

INSTRUM AVNeo 400 Nanobay  
PROBHD Z163739\_0178 (zg30)  
PULPROG zg30  
TD 32768  
SOLVENT DMSO  
NS 16  
DS 2  
SWH 8196.722 Hz  
FIDRES 0.500288 Hz  
AQ 1.9988480 sec  
RG 101  
DW 61.000 usec  
DE 13.89 usec  
TE 296.7 K  
D1 2.00000000 sec  
TD0 1  
SFO1 400.5324733 MHz  
NUC1 1H  
PO 2.67 usec  
P1 8.00 usec  
PLW1 21.78599930 W

F2 - Processing parameters

SI 65536  
SF 400.5300000 MHz  
WDW EM  
SSB 0  
LB 0.30 Hz  
GB 0  
PC 1.00

<sup>13</sup>C NMR of Compound 13d

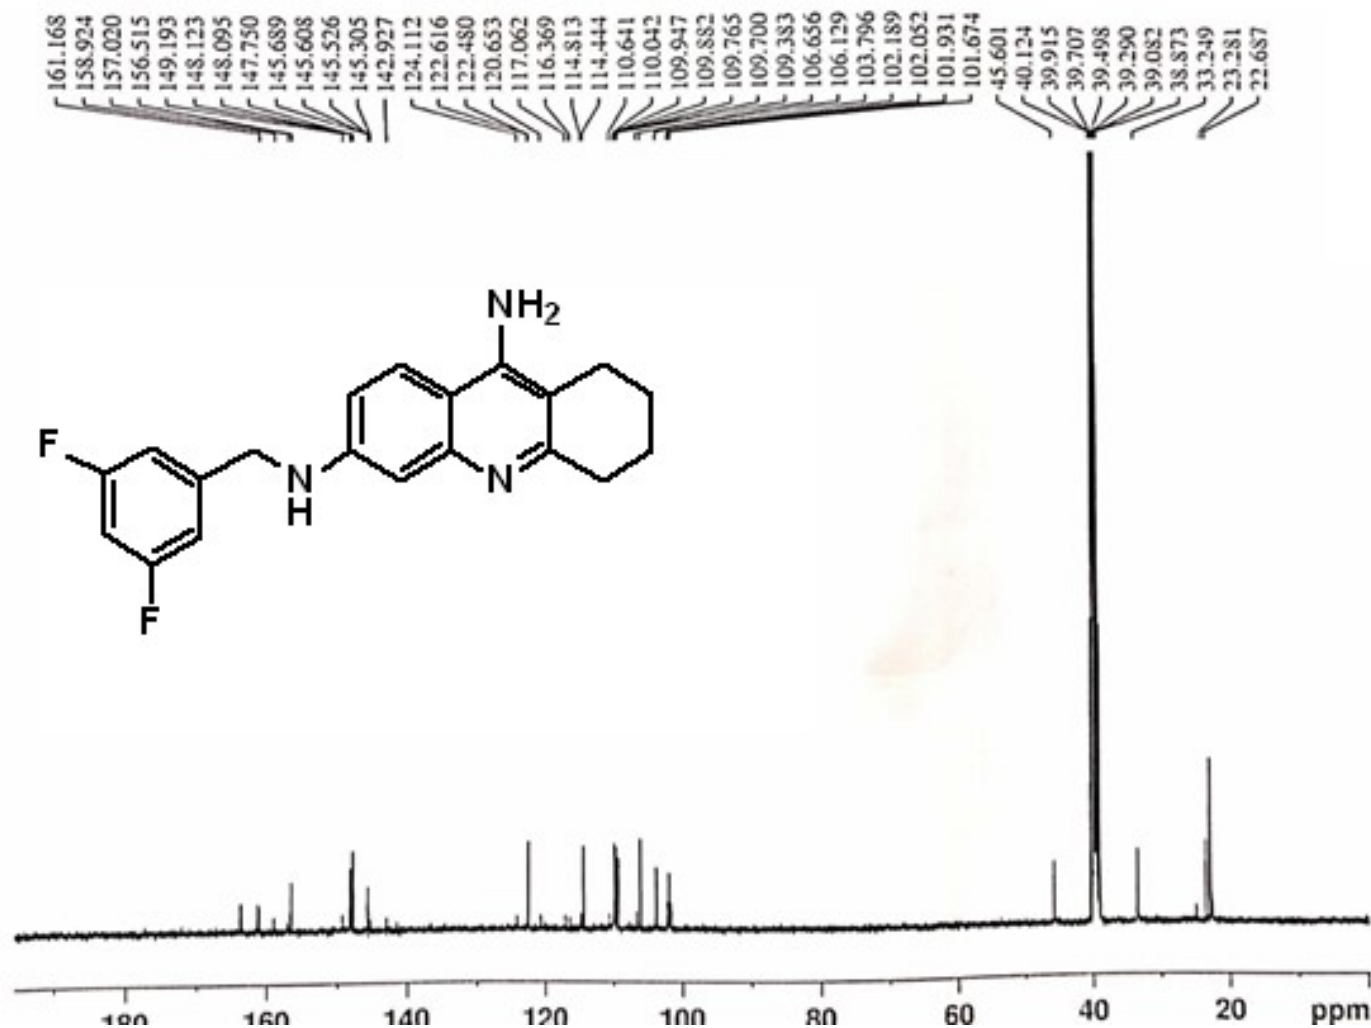

```

INSTRUM AVNao 400 Nanobay
PROCNO  2163733_0178 (
PULPROG  zgpg30
TD       32768
SOLVENT  DMSO
NS       2000
DS       4
SWH      23809.523 Hz
FIDRES   1.453218 Hz
AQ       0.6891280 sec
RG       101
DM       21.000 used
DE       6.50 used
TE       299.0 K
D1       2.00000000 sec
d11      0.03000000 sec
TD0      1
SFO1     100.7234199 MHz
NUC1     13C
P0       2.67 used
P1       8.00 used
PLW1     91.51399994 W
SFO2     400.5316021 MHz
NUC2     1H
CPDPRG2  waltz65
PCPD2    90.00 used
PLW2     21.78599930 W
PLW12    0.17214000 W
PLW13    0.08644800 W
    
```

```

F2 - Processing parameters
SI       32768
SF       100.7133993 MHz
NOM      3M
SSB      0
LA       1.00 Hz
GB       0
PC       1.40
    
```

<sup>1</sup>H NMR of Compound 13e

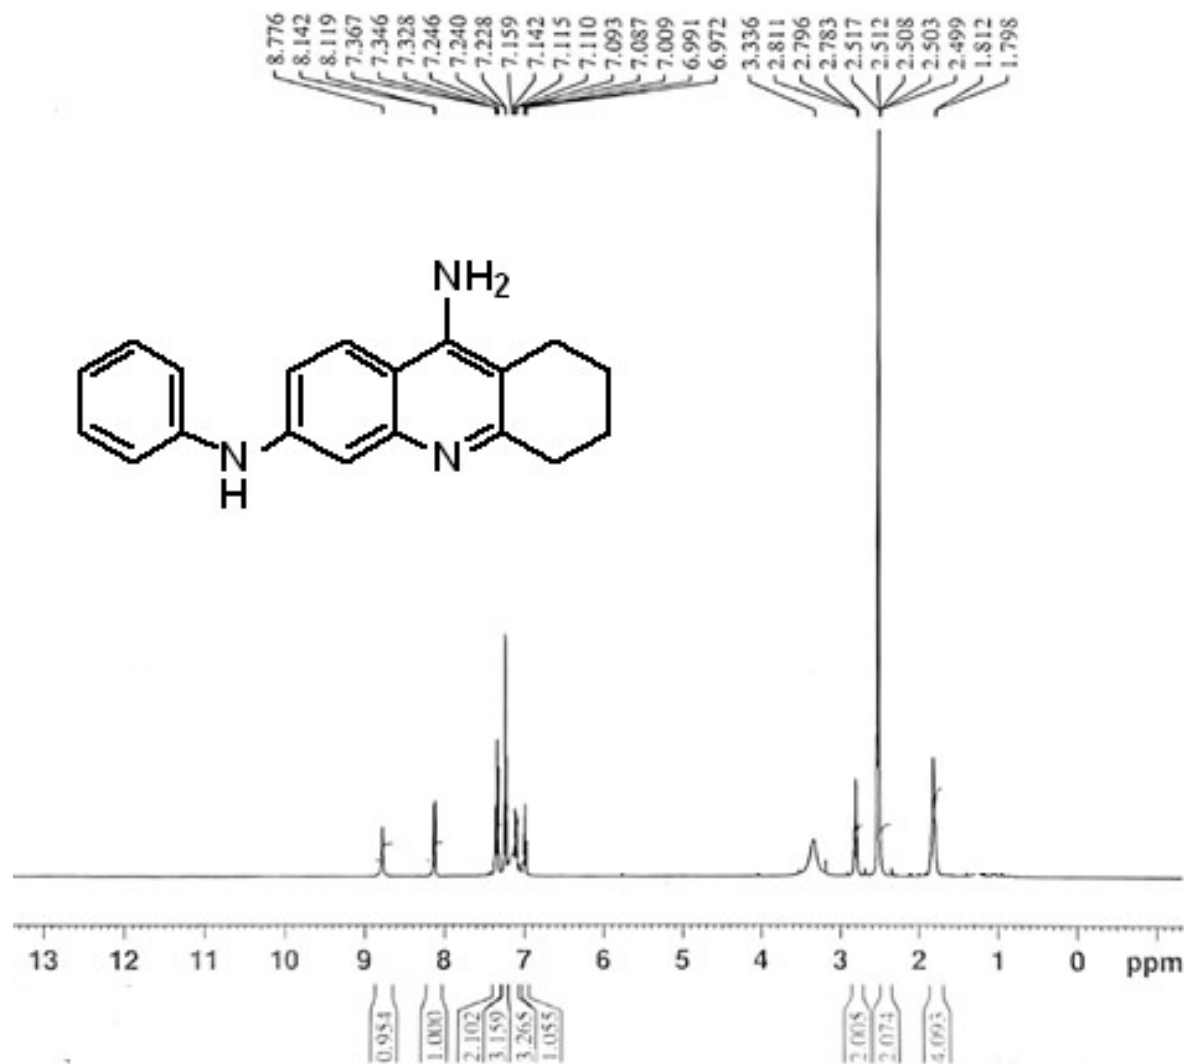

```

INSTRUM  AVNeo 400 Nanobay
PROBHD    Z163739_0178 (
PULPROG   zg30
TD         32768
SOLVENT    DMSO
NS         16
DS         2
SWH        8196.722 Hz
FIDRES     0.500288 Hz
AQ         1.9988480 sec
RG         101
DW         61.000 usec
DE         13.89 usec
TE         298.0 K
D1         2.00000000 sec
TDO        1
SFO1       400.5324733 MHz
NUC1       1H
P0         2.67 usec
P1         8.00 usec
PLW1       21.64200020 W
    
```

```

F2 - Processing parameters
SI         65536
SF         400.5300000 MHz
WDW        EM
SSB        0
LB         0.30 Hz
GB         0
PC         1.00
    
```

<sup>13</sup>C NMR of Compound 13e

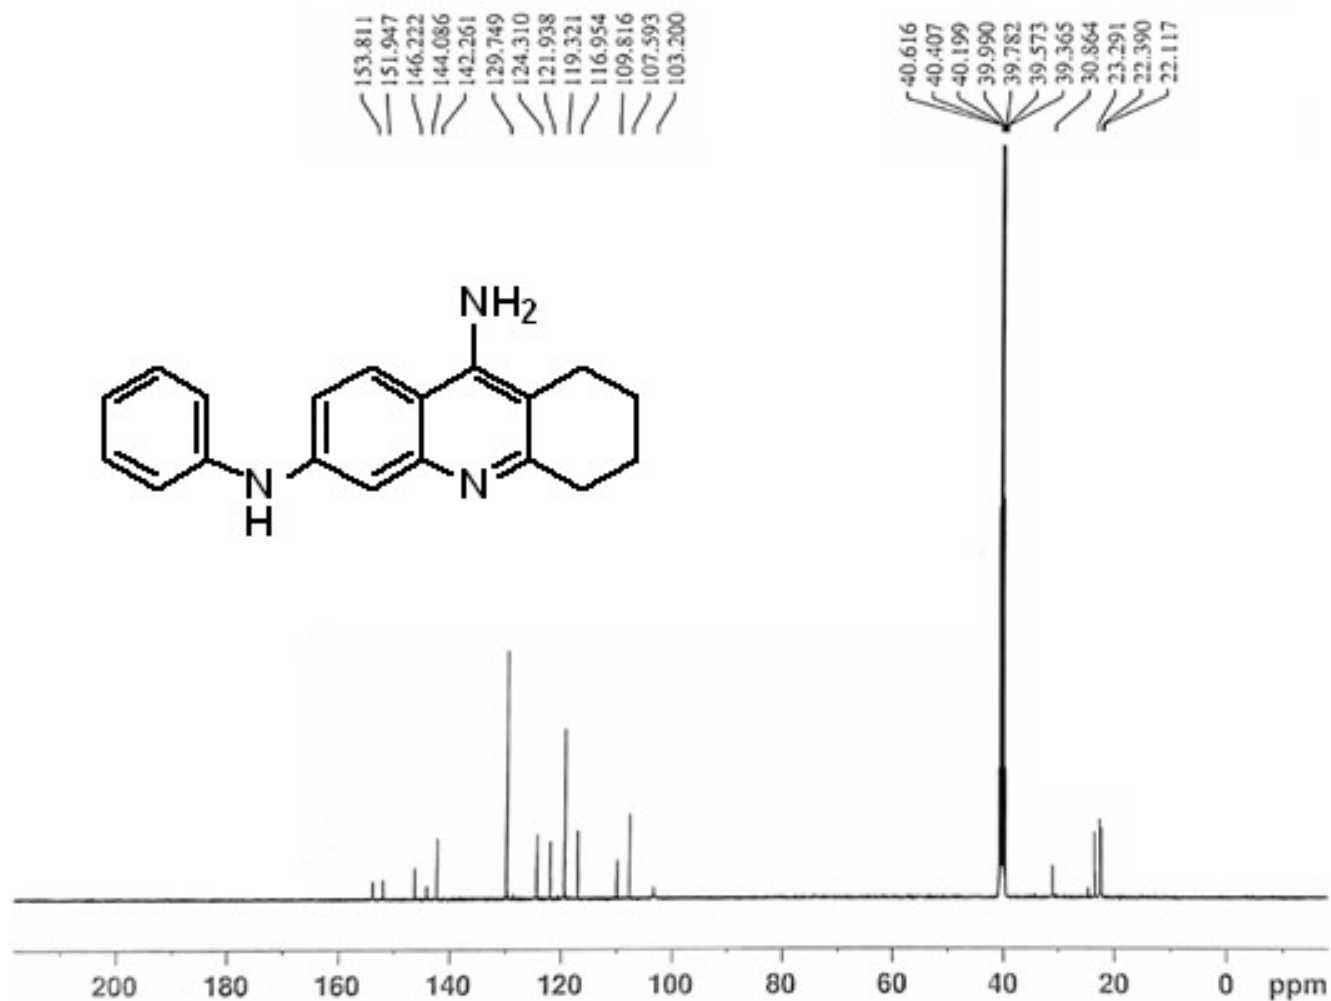

```

INSTRUM AVNeo 400 Nanobay
PROBHD Z163739_0178 (
PULPROG zgpg30
TD 32768
SOLVENT DMSO
NS 2000
DS 4
SWH 23809.523 Hz
FIDRES 1.453218 Hz
AQ 0.6881280 sec
RG 101
DM 21.000 usec
DE 6.50 usec
TE 298.0 K
D1 2.00000000 sec
D11 0.03000000 sec
TDO 1
SFO1 100.7234199 MHz
NUC1 13C
PO 2.67 usec
P1 8.00 usec
PLW1 90.91000365 W
SFO2 400.5316021 MHz
NUC2 1H
CPDPRG[2] waltz65
PCPD2 90.00 usec
PLW2 21.64200020 W
PLW12 0.17100000 W
PLW13 0.08587700 W

F2 - Processing parameters
SI 32768
SF 100.7133486 MHz
WDW EM
SSB 0
LB 1.00 Hz
GB 0
PC 1.40
    
```



# <sup>1</sup>H NMR of Compound 13f

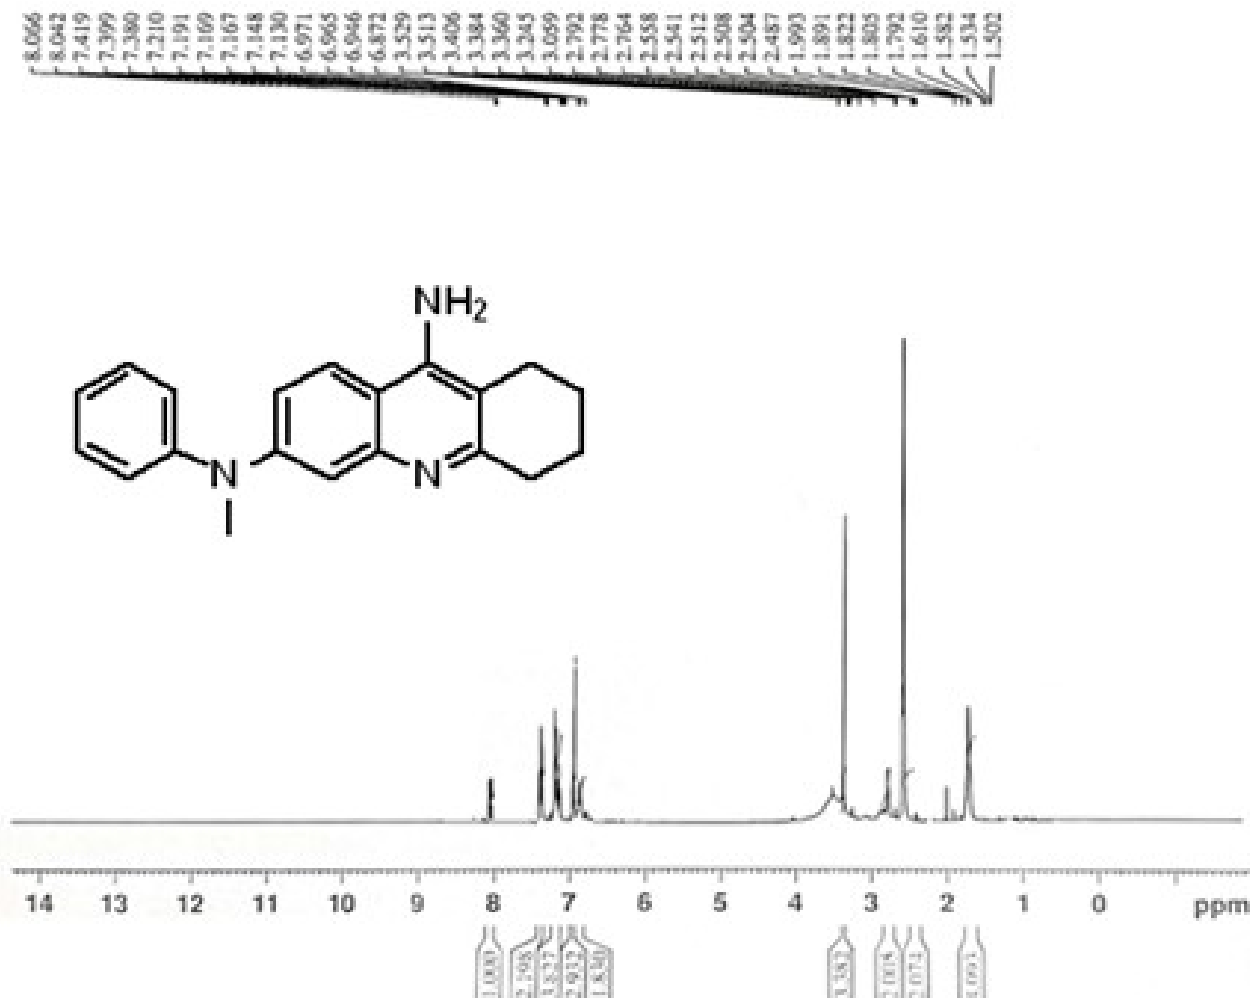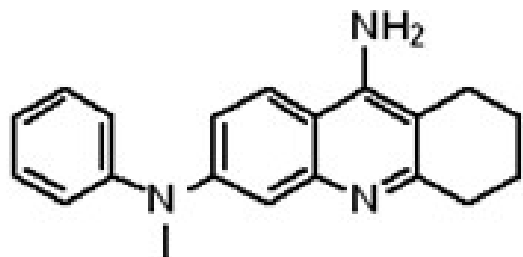

Current Data Parameters  
 NAME AMG\_131034\_10\_D015696  
 EXPRO 1  
 PROCNO 1

F2 - Acquisition Parameters  
 Date\_ 20220711  
 Time 20.05 h  
 INSTRUM AVNeo 400 Nanobay  
 PROBHD E163739\_0178 (4  
 PULPROG zg30  
 TD 32768  
 SOLVENT DMSO  
 NS 16  
 DS 2  
 SWH 8196.732 Hz  
 FIDRES 0.500288 Hz  
 AQ 1.9988480 sec  
 RG 91.8478  
 DM 61.000 usec  
 DE 13.89 usec  
 TE 298.0 K  
 D1 2.00000000 sec  
 TDO 1  
 SFO1 400.5324733 MHz  
 NUCL1 1H  
 P0 2.67 usec  
 P1 8.00 usec  
 PLW1 21.64200020 W

F2 - Processing parameters  
 SI 65536  
 SF 400.5300000 MHz  
 WDW EM  
 SSB 0  
 LB 0.30 Hz  
 GB 0  
 PC 1.00

<sup>13</sup>C NMR of Compound 13f

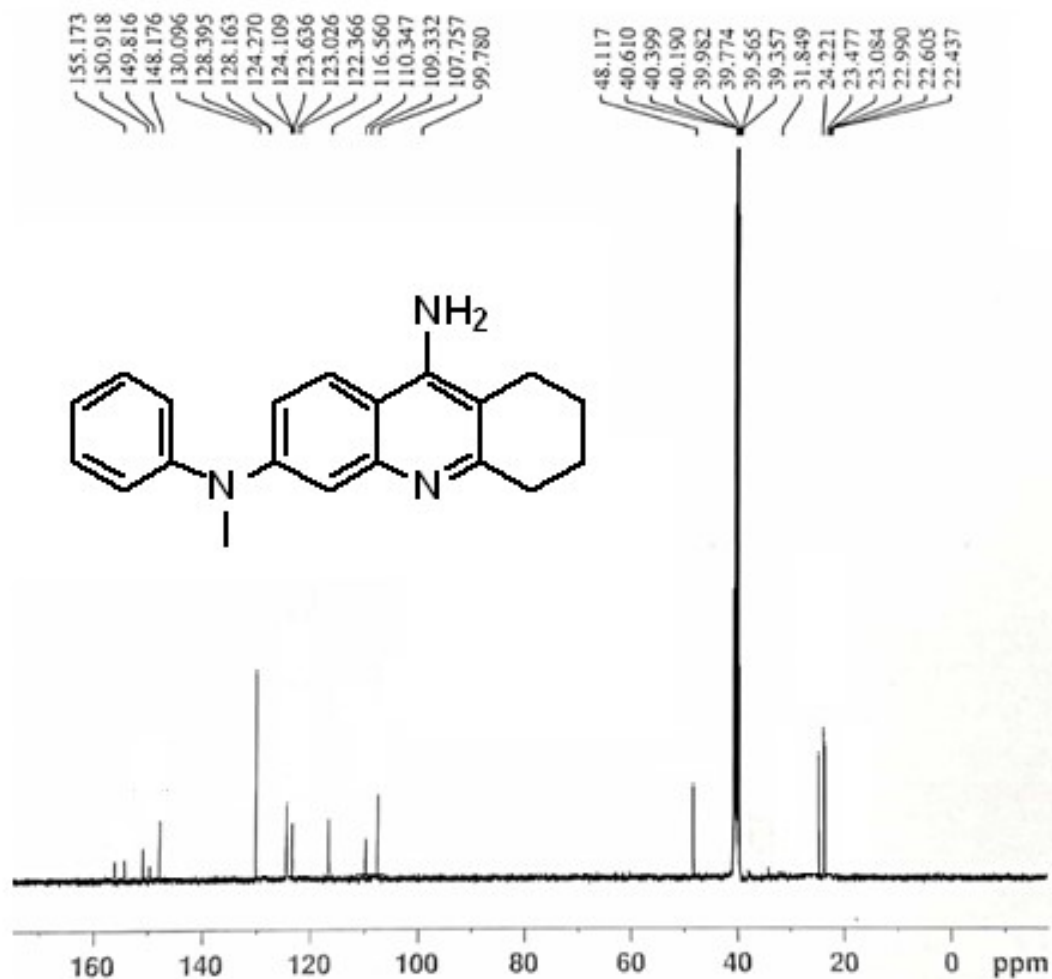

```

INSTRUM AVNeo 400 Nanobay
PROBRD 2163739_0178 (
PULPROG zgpg30
TD 32768
SOLVENT DMSO
NS 1024
DS 4
SWH 23809.523 KHz
FIDRES 1.453218 KHz
AQ 0.6881280 sec
RG 101
DM 21.000 usec
DE 6.50 usec
TE 298.0 K
D1 2.00000000 sec
D11 0.03000000 sec
TD0 1
SF01 100.7234199 MHz
NUC1 13C
P0 2.67 usec
P1 8.00 usec
PLW1 90.91000346 W
SF02 400.5316021 MHz
NUC2 1H
CPDPRG2 waltz65
PCPD2 90.00 usec
PLW2 21.64200020 W
PLW12 0.17100000 W
PLW13 0.08587700 W
    
```

```

F2 - Processing parameters
SI 32768
SF 100.7133486 MHz
WDW EM
SSB 0
LB 1.00 Hz
GB 0
FC 1.40
    
```

<sup>1</sup>H NMR of Compound 13g

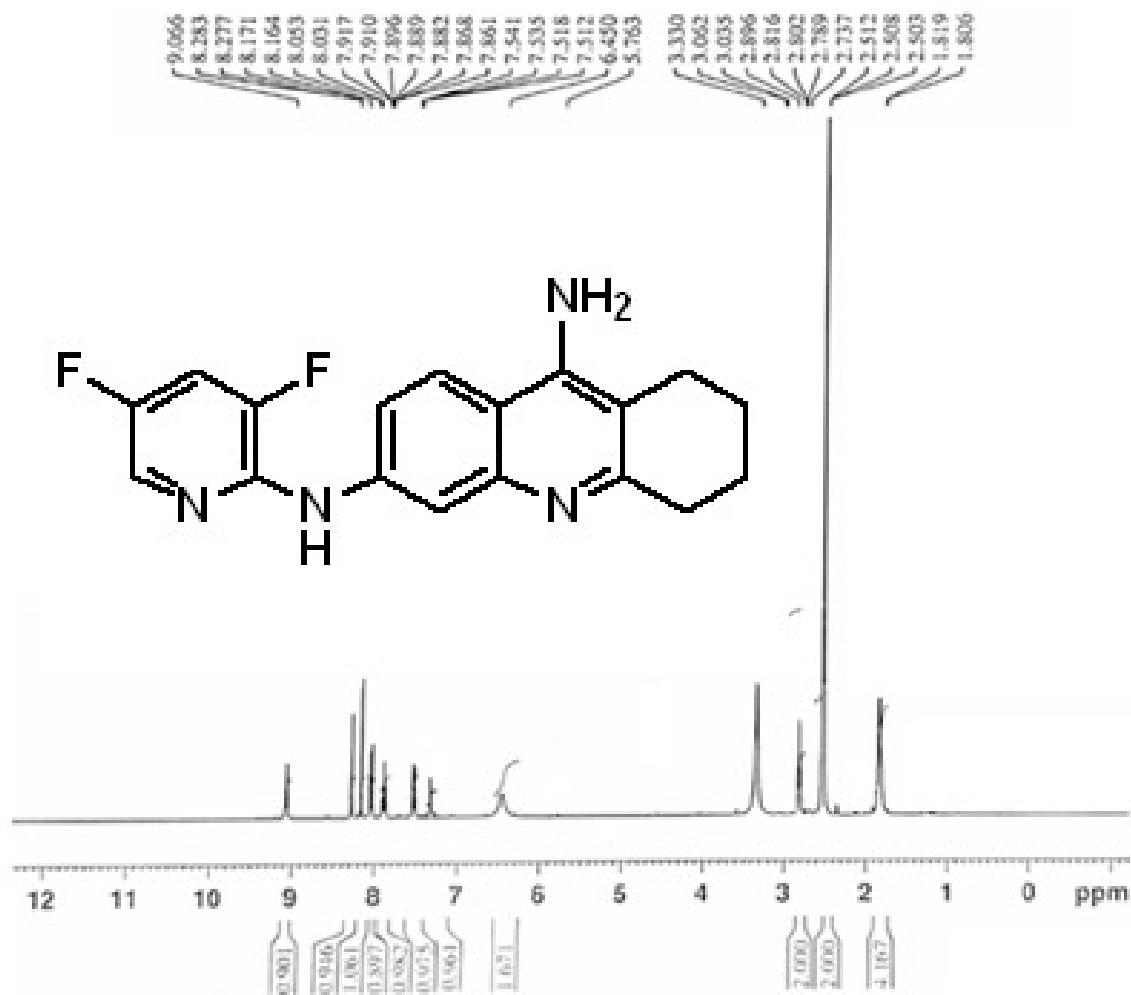

```

INSTRUM AVNec 400 Nanobay
PROBHD 1163739_0178 (
PULPROG zg30
TD 32768
SOLVENT DMSO
NS 16
DS 2
SWH 8196.722 Hz
FIDRES 0.300288 Hz
AQ 1.9988480 sec
RG 101
DM 41.000 usec
DE 13.89 usec
TE 298.0 K
D1 2.00000000 sec
TD0 1
SF01 400.5324733 MHz
NUC1 1H
PO 2.67 usec
P1 8.00 usec
PLW1 21.64200020 W
    
```

```

F2 - Processing parameters
SI 65536
SF 400.5300000 MHz
WDW EM
SSB 0
LB 0.30 Hz
GB 0
PC 1.00
    
```

<sup>13</sup>C NMR of Compound 13g

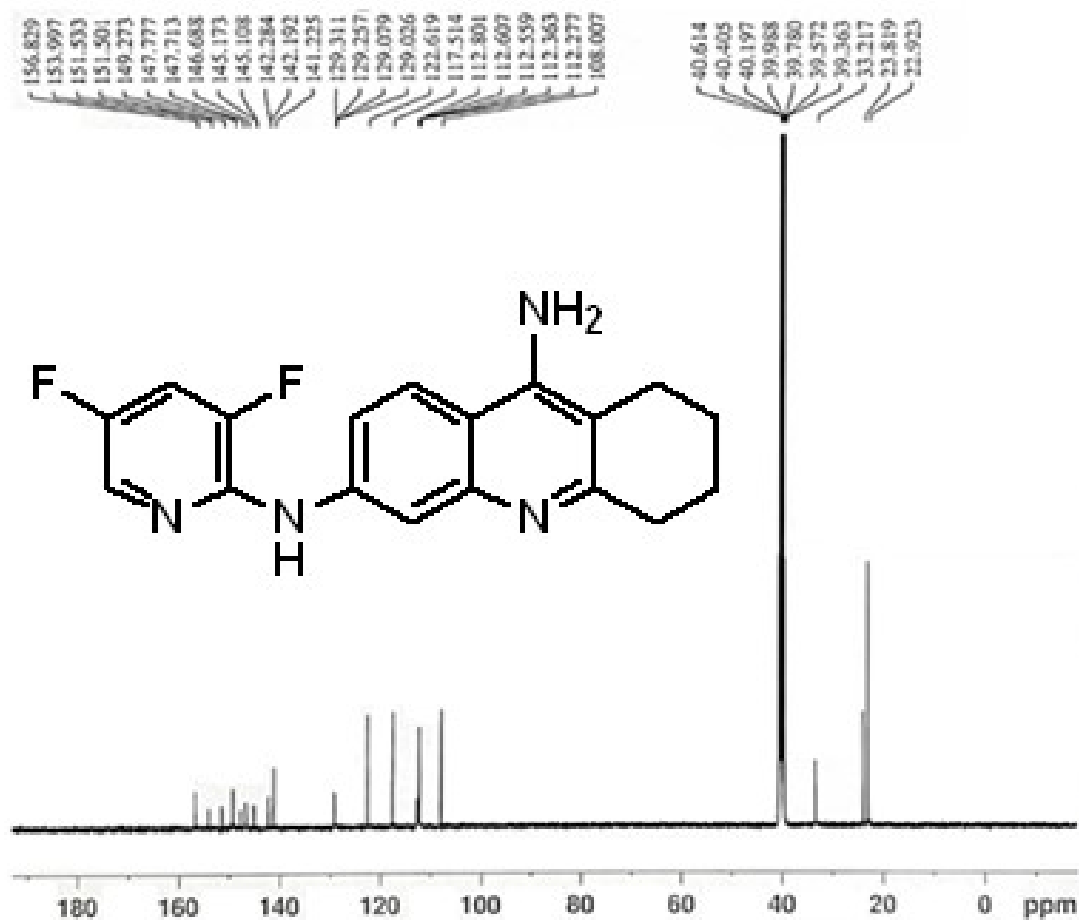

```

INSTRUM AVNco 400 Mainzby
PROCNO  2167738_0178 (
PULPROG  zgpg30
TD       32768
SOLVENT  DMSO
NS       1024
DS       4
SWH      23809.323 Hz
FIDRES   1.458218 Hz
AQ       0.4881280 sec
RG       101
OR       31.000 used
DE       0.50 used
TE       298.0 K
D1       2.00000000 sec
D11      0.03000000 sec
TD0      1
SFO1     100.7134199 MHz
NUC1     13C
PC       2.67 used
P1       8.00 used
PLM1     90.91000366 W
SFO2     400.5114021 MHz
NUC2     1H
CPDPRG2  waltz163
PCPD2    90.00 used
PLM2     21.64200020 W
PLM3     0.17100000 W
PLM4     0.00287700 W

F2 - Processing parameters
SI       32768
SF       100.7133484 MHz
WDW      EM
SSB      0
LB       1.00 Hz
GB       0
PC       1.40
    
```
